# Supplementary material
Source: publisher figshare collection journal article supplement (https://acs.figshare.com/ndownloader/files/12977714)
Supplement: Supplementary file 1 [file 12977714]

## Sheet: Public_data_for_release_in_supp
PubChem_CID	CANONICAL_SMILES	ACTIVITY_ID	STANDARD_TYPE (other type)	Ki(uM)	Kd(uM)	IC50(uM)	Other	Other(units	RELATION	STANDARD_VALUE	STANDARD_UNITS	Activity Concentration[uM]	PCHEMBL_VALUE	Concentration	ACTIVITY_COMMENT	DATA_VALIDITY_COMMENT	POTENTIAL_DUPLICATE	BAO_ENDPOINT	UO_UNITS	QUDT_UNITS	ASSAY_ID	ASSAY_CHEMBLID	ASSAY_TYPE	DESCRIPTION	ASSAY_SRC_ID	ASSAY_SRC_DESCRIPTION	ASSAY_ORGANISM	ASSAY_STRAIN	ASSAY_TAX_ID	CURATED_BY	BAO_FORMAT	TID	TARGET_CHEMBLID	TARGET_TYPE	PROTEIN_ACCESSION	PREF_NAME	ORGANISM	CONFIDENCE_SCORE	TARGET_MAPPING	APD_NAME	APD_CONFIDENCE	DOC_ID	DOC_CHEMBLID	PUBMED_ID	JOURNAL	YEAR	VOLUME	ISSUE	FIRST_PAGE
24229806	CNC(=O)c1scc2OCCOc12	13890245	IC50						=	241000	nM		3.62		N			BAO_0000190	UO_0000065	http://www.openphacts.org/units/Nanomolar	1286637	CHEMBL3111112	B	Displacement of biotinylated H3Kac14 peptide from His6-tagged human BAZ2B expressed in Escherichia coli BL21(DE3) after 30 mins by AlphaScreen assay	1	Scientific Literature	Homo sapiens		9606	Autocuration	BAO_0000019	104016	CHEMBL1741220	SINGLE PROTEIN	Q9UIF8	Bromodomain adjacent to zinc finger domain protein 2B	Homo sapiens	9	Protein			76677	CHEMBL3108698	24304323	J. Med. Chem.	2013	56	24	10183
32854678	CC(=O)N1CCc2[nH]c3ccc(Br)cc3c2C1	13890223	IC50						=	12000	nM		4.92		N			BAO_0000190	UO_0000065	http://www.openphacts.org/units/Nanomolar	1286636	CHEMBL3111111	B	Displacement of biotinylated H3Kac14 peptide from His6-tagged human BAZ2B expressed in Escherichia coli BL21(DE3) after 30 mins by AlphaLISA assay	1	Scientific Literature	Homo sapiens		9606	Autocuration	BAO_0000019	104016	CHEMBL1741220	SINGLE PROTEIN	Q9UIF8	Bromodomain adjacent to zinc finger domain protein 2B	Homo sapiens	9	Protein			76677	CHEMBL3108698	24304323	J. Med. Chem.	2013	56	24	10183
46907787	Cc1sc2c(C(=N[C@@H](CC(=O)OC(C)(C)C)c3nnc(C)n23)c4ccc(Cl)cc4)c1C	8046386	Kd						=	59.5	nM		7.23		A			BAO_0000034	UO_0000065	http://www.openphacts.org/units/Nanomolar	807438	CHEMBL1958560	B	Binding affinity to BRD3-BD1 by isothermal titration calorimetry	1	Scientific Literature				Autocuration	BAO_0000357	104266	CHEMBL1795186	SINGLE PROTEIN	Q15059	Bromodomain-containing protein 3	Homo sapiens	8	Homologous protein			61257	CHEMBL1955852	22316554	Bioorg. Med. Chem.	2012	20	6	1887
46907787	Cc1sc2c(C(=N[C@@H](CC(=O)OC(C)(C)C)c3nnc(C)n23)c4ccc(Cl)cc4)c1C	8046387	Kd						=	82	nM		7.09		A			BAO_0000034	UO_0000065	http://www.openphacts.org/units/Nanomolar	807437	CHEMBL1958559	B	Binding affinity to BRD3-BD2 by isothermal titration calorimetry	1	Scientific Literature				Autocuration	BAO_0000357	104266	CHEMBL1795186	SINGLE PROTEIN	Q15059	Bromodomain-containing protein 3	Homo sapiens	8	Homologous protein			61257	CHEMBL1955852	22316554	Bioorg. Med. Chem.	2012	20	6	1887
975713	Cc1cc(c2ccccc2)n3nc(N)nc3n1	13477945	Inhibition						=	32	%		3.2747	250	N			BAO_0000201	UO_0000187	http://qudt.org/vocab/unit#Percent	988293	CHEMBL2439747	B	Inhibition of His-tagged first bromodomain of BRD4 (unknown origin) using H-SGRGK(Ac)GGK(Ac)GLGK-(Ac)GGAK(Ac)RHRK(Biotin)-OH as substrate at 250 uM preincubated for 30 mins prior to substrate addition measured after 30 mins by AlphaScreen assay relative to control	1	Scientific Literature	Homo sapiens		9606	Autocuration	BAO_0000357	103454	CHEMBL1163125	SINGLE PROTEIN	O60885	Bromodomain-containing protein 4	Homo sapiens	9	Protein			75196	CHEMBL2434916	24090311	J. Med. Chem.	2013	56	20	8073
2824992	CN1C(=O)CC(Nc2ccccc12)c3ccccc3	14661059	IC50						=	7500	nM		5.12		A			BAO_0000190	UO_0000065	http://www.openphacts.org/units/Nanomolar	1349750	CHEMBL3267582	B	Displacement of histone peptide from His-tagged BRD4(1) (unknown origin) expressed in Escherichia coli BL21(DE3) by alpha-screen assay	1	Scientific Literature	Homo sapiens		9606	Autocuration	BAO_0000019	103454	CHEMBL1163125	SINGLE PROTEIN	O60885	Bromodomain-containing protein 4	Homo sapiens	9	Protein			83201	CHEMBL3259646	24767840	Bioorg. Med. Chem. Lett.	2014	24	11	2493
3846558	CN1Cc2ccccc2NC1=O	12134097	IC50						=	39000	nM		4.41		N			BAO_0000190	UO_0000065	http://www.openphacts.org/units/Nanomolar	878136	CHEMBL2183681	B	Inhibition of BRD4 isoform 1 by AlphaScreen assay	1	Scientific Literature				Autocuration	BAO_0000357	103454	CHEMBL1163125	SINGLE PROTEIN	O60885	Bromodomain-containing protein 4	Homo sapiens	8	Homologous protein			66670	CHEMBL2177039	23095041	J. Med. Chem.	2012	55	22	9831
5325760	Cc1onc(C)c1c2ccccc2	12733056	IC50						=	0.8	nM		9.1		A			BAO_0000190	UO_0000065	http://www.openphacts.org/units/Nanomolar	953486	CHEMBL2351097	B	Displacement of FITC-labeled (+)-JQ1 from bromodomain BRD4(1) (unknown origin) expressed in Escherichia coli BL21(DE3) after 4 hrs by fluorescence anisotropy assay	1	Scientific Literature	Homo sapiens		9606	Autocuration	BAO_0000019	103454	CHEMBL1163125	SINGLE PROTEIN	O60885	Bromodomain-containing protein 4	Homo sapiens	9	Protein			72867	CHEMBL2346589	23530754	J. Med. Chem.	2013	56	10	3833
11128828	CCc1cc2C(=O)CCCc2n1Cc3ccccc3	14661049	IC50						=	7000	nM		5.15		A			BAO_0000190	UO_0000065	http://www.openphacts.org/units/Nanomolar	1349750	CHEMBL3267582	B	Displacement of histone peptide from His-tagged BRD4(1) (unknown origin) expressed in Escherichia coli BL21(DE3) by alpha-screen assay	1	Scientific Literature	Homo sapiens		9606	Autocuration	BAO_0000019	103454	CHEMBL1163125	SINGLE PROTEIN	O60885	Bromodomain-containing protein 4	Homo sapiens	9	Protein			83201	CHEMBL3259646	24767840	Bioorg. Med. Chem. Lett.	2014	24	11	2493
72713637	CC(=O)Nc1cccc(c1)c2cc(C)[n+]([O-])c3ccccc23	13477934	IC50						=	42000	nM		4.38		N			BAO_0000190	UO_0000065	http://www.openphacts.org/units/Nanomolar	988295	CHEMBL2439861	B	Inhibition of His-tagged first bromodomain of BRD4 (unknown origin) using H-SGRGK(Ac)GGK(Ac)GLGK-(Ac)GGAK(Ac)RHRK(Biotin)-OH as substrate preincubated for 30 mins prior to substrate addition measured after 30 mins by AlphaScreen assay	1	Scientific Literature	Homo sapiens		9606	Autocuration	BAO_0000357	103454	CHEMBL1163125	SINGLE PROTEIN	O60885	Bromodomain-containing protein 4	Homo sapiens	9	Protein			75196	CHEMBL2434916	24090311	J. Med. Chem.	2013	56	20	8073
76310219	Cc1nnc2c3ccccc3c(nn12)c4ccc(N5CCOCC5)c(NS(=O)(=O)c6ccccc6Cl)c4	13891622	IC50						=	158.49	nM		6.8		A			BAO_0000190	UO_0000065	http://www.openphacts.org/units/Nanomolar	1287025	CHEMBL3111336	B	Displacement of H4Ac4 peptide from BRD4 bromodomain-1 (unknown origin) by AlphaScreen assay	1	Scientific Literature	Homo sapiens		9606	Autocuration	BAO_0000357	103454	CHEMBL1163125	SINGLE PROTEIN	O60885	Bromodomain-containing protein 4	Homo sapiens	9	Protein			76683	CHEMBL3108763	24313754	J. Med. Chem.	2014	57	2	462
72943187	CCOC(=O)Nc1cc(nn2c(C)nnc12)c3ccc(C)c(NS(=O)(=O)C)c3	13973361	Kd						=	1480	nM		5.83		A			BAO_0000034	UO_0000065	http://www.openphacts.org/units/Nanomolar	1301085	CHEMBL3134643	B	Binding affinity to human recombinant biotinylated BRD9 compound treated in ammonium acetate buffer by FAC-MS analysis	1	Scientific Literature	Homo sapiens		9606	Autocuration	BAO_0000357	108000	CHEMBL3108640	SINGLE PROTEIN	Q9H8M2	Bromodomain-containing protein 9	Homo sapiens	9	Protein			77364	CHEMBL3132771		MedChemComm	2014	5	4	540
3277	CCN1C2=NC=C(C(=C2C=N1)NN=C(C)C)C(=O)OCC		Potency									3.1623	5.5		A						907			Confirmation Concentration-Response Assay for Cell signaling CRE-BLA (Fsk stim) - HEK293 CREB Luciferase												CREB-binding protein
4122	COC(=O)NC1=NC2=C(N1)C=C(C=C2)C(=O)C3=CC=CS3		Potency									0.7943	6.10002		A						916			Confirmation Concentration-Response Assay for Cell signaling CRE-BLA (Fsk stim)												CREB-binding protein
5522	CCCCNC1=C2C=NN(C2=NC(=C1C(=O)OCC)C)CC		Potency									0.7943	6.10002		A						907			Confirmation Concentration-Response Assay for Cell signaling CRE-BLA (Fsk stim) - HEK293 CREB Luciferase												CREB-binding protein
6167	CC(=O)N[C@H]1CCC2=CC(=C(C(=C2C3=CC=C(C(=O)C=C13)OC)OC)OC)OC		Potency									5.0119	5.3		A						916			Confirmation Concentration-Response Assay for Cell signaling CRE-BLA (Fsk stim)												CREB-binding protein
97662	COC1=C(C2=C3C(=C1)C=CN=C3C(=O)C4=CC(=C(C=C42)OC)OC)OC		Potency									0.1585	6.79997		A						907			Confirmation Concentration-Response Assay for Cell signaling CRE-BLA (Fsk stim) - HEK293 CREB Luciferase												CREB-binding protein
448055	COC1=C(C=C(C=C1)[C@H]2CC(=O)NC2)OC3CCCC3		Potency									0.0282	7.54975		A						907			Confirmation Concentration-Response Assay for Cell signaling CRE-BLA (Fsk stim) - HEK293 CREB Luciferase												CREB-binding protein
606837	C1COCCN1C2=NC(=NC(=N2)CSCC3=CC=CC=C3)N		Potency									2.8184	5.55		A						907			Confirmation Concentration-Response Assay for Cell signaling CRE-BLA (Fsk stim) - HEK293 CREB Luciferase												CREB-binding protein
644441	CC1=NN(C2=C1C=C(S2)C(=O)N(CC3=CC=CO3)CC(=O)NC(C)(C)C)C4=CC=CC=C4		Potency									12.5893	4.9	4.9	N						907			Confirmation Concentration-Response Assay for Cell signaling CRE-BLA (Fsk stim) - HEK293 CREB Luciferase												CREB-binding protein
649357	CN1C(=O)C2=C(N=C1SCC(=O)N3CCOCC3)SC4=C2CCCC4		Potency									3.5481	5.45		A						907			Confirmation Concentration-Response Assay for Cell signaling CRE-BLA (Fsk stim) - HEK293 CREB Luciferase												CREB-binding protein
651563	CCCN(C#N)C1=NC(=NC(=N1)NC(C)C)NCC		Potency									12.5893	4.9	4.9	N						916			Confirmation Concentration-Response Assay for Cell signaling CRE-BLA (Fsk stim)												CREB-binding protein
652999	CCNC1=NC(=NC(=N1)N(CC)C#N)NC(C)(C)C		Potency									1.2589	5.90001		A						907			Confirmation Concentration-Response Assay for Cell signaling CRE-BLA (Fsk stim) - HEK293 CREB Luciferase												CREB-binding protein
653813	CC1=NC2=NC=NN2C(=C1)N3CCN(CC3)S(=O)(=O)C4=CC5=C(C=C4)OCCO5		Potency									12.5893	4.9	4.9	N						907			Confirmation Concentration-Response Assay for Cell signaling CRE-BLA (Fsk stim) - HEK293 CREB Luciferase												CREB-binding protein
655128	CC1=NN(C2=C1C=C(S2)C(=O)N(CC3=CC=CO3)C(C)C(=O)NC(C)(C)C)C4=CC=CC=C4		Potency									12.5893	4.9	4.9	N						906			Cell Viability - CRE-beta lactamase CHO cell - 40 hr assay												CREB-binding protein
658195	CC1(CC2=C(CO1)SC3=C2C(=O)N(C(=N3)SCC#N)C4CCCCC4)C		Potency									19.9526	4.7	4.7	N						916			Confirmation Concentration-Response Assay for Cell signaling CRE-BLA (Fsk stim)												CREB-binding protein
661324	C1=CC=C(C=C1)C2=NC(=NN2)SCC3=NC(=NC(=N3)NC4=CC=CC=C4)N		Potency									5.0119	5.3		A						907			Confirmation Concentration-Response Assay for Cell signaling CRE-BLA (Fsk stim) - HEK293 CREB Luciferase												CREB-binding protein
661880	C1CCC2=C(C1)C3=C(S2)N=CN4C3=NC(=N4)CC#N		Potency									5.0119	5.3		A						907			Confirmation Concentration-Response Assay for Cell signaling CRE-BLA (Fsk stim) - HEK293 CREB Luciferase												CREB-binding protein
662965	COC1=C(C=C(C=C1)C2=NN3C(=NN=C3SC2)C4=CC=CC=C4OC)OC		Potency									0.0398	7.40012		A						907			Confirmation Concentration-Response Assay for Cell signaling CRE-BLA (Fsk stim) - HEK293 CREB Luciferase												CREB-binding protein
663539	CC1=NC2=C(C(=N1)SCC(=O)NC3=CC4=C(C=C3)OCCO4)OC5=CC=CC=C52		Potency									5.0119	5.3		A						907			Confirmation Concentration-Response Assay for Cell signaling CRE-BLA (Fsk stim) - HEK293 CREB Luciferase												CREB-binding protein
663661	C1=CC=C2C(=C1)C3=C(O2)C(=NC=N3)SCC4=NC5=CC=CC=C5N4		Potency									0.7943	6.10002		A						907			Confirmation Concentration-Response Assay for Cell signaling CRE-BLA (Fsk stim) - HEK293 CREB Luciferase												CREB-binding protein
663675	CC1=CC(=NC(=N1)N2CCN(CC2)C3=NC(=NC4=C3OC5=CC=CC=C54)C)C		Potency									3.1623	5.5		A						907			Confirmation Concentration-Response Assay for Cell signaling CRE-BLA (Fsk stim) - HEK293 CREB Luciferase												CREB-binding protein
663707	C1=CC=C2C(=C1)C3=C(O2)C(=NC=N3)SCC4=CC=C(C=C4)F		Potency									10	5		A						916			Confirmation Concentration-Response Assay for Cell signaling CRE-BLA (Fsk stim)												CREB-binding protein
663905	CC1=NC2=C(C(=N1)SCC(=O)N3CCCC4=CC=CC=C43)OC5=CC=CC=C52		Potency									3.9811	5.4		A						907			Confirmation Concentration-Response Assay for Cell signaling CRE-BLA (Fsk stim) - HEK293 CREB Luciferase												CREB-binding protein
664240	CC1=CC2=C(C=C1)C(=NC(=N2)NC3=NC(=O)C=C(N3)CSC4=NN=NN4C5=CC=CC=C5)C		Potency									3.1623	5.5		A						907			Confirmation Concentration-Response Assay for Cell signaling CRE-BLA (Fsk stim) - HEK293 CREB Luciferase												CREB-binding protein
664274	COC1=C(C=C(C=C1)Cl)NC(=O)CSC2=NC=NC3=C2OC4=CC=CC=C43		Potency									1.2589	5.90001		A						907			Confirmation Concentration-Response Assay for Cell signaling CRE-BLA (Fsk stim) - HEK293 CREB Luciferase												CREB-binding protein
664279	CC1=NC2=C(C(=N1)SCC3=NC4=CC=CC=C4N3)OC5=CC=CC=C52		Potency									1	6		A						907			Confirmation Concentration-Response Assay for Cell signaling CRE-BLA (Fsk stim) - HEK293 CREB Luciferase												CREB-binding protein
664361	CC1=NC2=C(C(=N1)SCC(=O)NC3=CC=CC=C3)OC4=CC=CC=C42		Potency									5.0119	5.3		A						907			Confirmation Concentration-Response Assay for Cell signaling CRE-BLA (Fsk stim) - HEK293 CREB Luciferase												CREB-binding protein
664458	C1=CC=C2C(=C1)C3=C(O2)C(=NC=N3)SCC(=O)C4=CC=CS4		Potency									1.2589	5.90001		A						907			Confirmation Concentration-Response Assay for Cell signaling CRE-BLA (Fsk stim) - HEK293 CREB Luciferase												CREB-binding protein
665196	CC1=NC2=C(C(=N1)SCC(=O)NCCC3=CC(=C(C=C3)OC)OC)OC4=CC=CC=C42		Potency									12.5893	4.9	4.9	N						916			Confirmation Concentration-Response Assay for Cell signaling CRE-BLA (Fsk stim)												CREB-binding protein
665236	CCC1=NC2=C(C(=N1)SCC(=O)NC3=CC4=C(C=C3)OCCO4)OC5=CC=CC=C52		Potency									31.6228	4.5	4.5	N						906			Cell Viability - CRE-beta lactamase CHO cell - 40 hr assay												CREB-binding protein
665291	CCC1=NC2=C(C(=N1)SCC(=O)N3CCC4=CC=CC=C43)OC5=CC=CC=C52		Potency									14.1254	4.85	4.85	N						907			Confirmation Concentration-Response Assay for Cell signaling CRE-BLA (Fsk stim) - HEK293 CREB Luciferase												CREB-binding protein
665473	CC1=CC(=NN1)C2=NN=C3N2N=C(CS3)C4=CC=C(C=C4)C5=CC=CC=C5		Potency									12.5893	4.9	4.9	N						916			Confirmation Concentration-Response Assay for Cell signaling CRE-BLA (Fsk stim)												CREB-binding protein
665947	CCCC1=C2COC(CC2=C3C4=C(C(=NC=N4)NCC5=CC=CC=N5)OC3=N1)(C)C		Potency									0.3981	6.40001		A						907			Confirmation Concentration-Response Assay for Cell signaling CRE-BLA (Fsk stim) - HEK293 CREB Luciferase												CREB-binding protein
666981	COC1=CC(=CC(=C1OC)OC)C2=NN=C3N2N=C(S3)C4=CC=CO4		Potency									3.1623	5.5		A						907			Confirmation Concentration-Response Assay for Cell signaling CRE-BLA (Fsk stim) - HEK293 CREB Luciferase												CREB-binding protein
667325	CCOC1=C(C=CC(=C1)C2C3=C(C(=O)N2CC4=CC=CO4)OC5=CC(=C(C=C5C3=O)Cl)C)O		Potency									0.7943	6.10002		A						907			Confirmation Concentration-Response Assay for Cell signaling CRE-BLA (Fsk stim) - HEK293 CREB Luciferase												CREB-binding protein
676035	COC1=C(C=CC(=C1)C2=CC(=O)C3=CC=CC=C3O2)O		Potency									15.8489	4.8	4.8	N						916			Confirmation Concentration-Response Assay for Cell signaling CRE-BLA (Fsk stim)												CREB-binding protein
694179	CC1=NN(C2=C1C=C(S2)C(=O)N3CCCCC3)C4=CC=CC=C4		Potency									10	5		A						907			Confirmation Concentration-Response Assay for Cell signaling CRE-BLA (Fsk stim) - HEK293 CREB Luciferase												CREB-binding protein
802075	CCCN(CCC)C1=NC2=CC=CC=C2N3C1=NN=C3C		Potency									12.5893	4.9	4.9	N						916			Confirmation Concentration-Response Assay for Cell signaling CRE-BLA (Fsk stim)												CREB-binding protein
976690	CC1=CC2=C(C=C1)N(C3=NC4=CC=CC=C4N=C23)CCN5CCOCC5		Potency									3.9811	5.4		A						907			Confirmation Concentration-Response Assay for Cell signaling CRE-BLA (Fsk stim) - HEK293 CREB Luciferase												CREB-binding protein
1018416	CSC1=NC2=C(S1)C=C(C=C2)NC3=NC(=NC(=N3)N4CCOCC4)N5CCOCC5		Potency									12.5893	4.9	4.9	N						916			Confirmation Concentration-Response Assay for Cell signaling CRE-BLA (Fsk stim)												CREB-binding protein
1242271	CC1=C(SC2=C1C(=O)N(C(=N2)SCC3=NC4=CC=CC=C4N3)CC5=CC=CO5)C		Potency									1.5849	5.8		A						907			Confirmation Concentration-Response Assay for Cell signaling CRE-BLA (Fsk stim) - HEK293 CREB Luciferase												CREB-binding protein
1314771	CN1C(=O)C2=CC=CC=C2C(=N1)C3=CC(=C(C=C3)N4CCCCC4)NC(=O)C5=CC=CO5		Potency									0.631	6.19997		A						907			Confirmation Concentration-Response Assay for Cell signaling CRE-BLA (Fsk stim) - HEK293 CREB Luciferase												CREB-binding protein
1825648	CC1=NC(=NC2=C1C=CC=C2OC)NC3=NC(=O)C=C(N3)CSC4=NN=C(S4)C		Potency									6.3096	5.2		A						907			Confirmation Concentration-Response Assay for Cell signaling CRE-BLA (Fsk stim) - HEK293 CREB Luciferase												CREB-binding protein
2058657	COC(=O)C1=CC=C(O1)CSC2=NC(=O)C3=CNN(C3=N2)C4=CC=C(C=C4)F		Potency									15.8489	4.8	4.8	N						916			Confirmation Concentration-Response Assay for Cell signaling CRE-BLA (Fsk stim)												CREB-binding protein
2058658	CCCSC1=NC(=O)C2=CNN(C2=N1)C3=CC=C(C=C3)F		Potency									6.3096	5.2		A						907			Confirmation Concentration-Response Assay for Cell signaling CRE-BLA (Fsk stim) - HEK293 CREB Luciferase												CREB-binding protein
2152933	C1=CC=C(C=C1)N2C3=NC(=NC(=O)C3=CN2)SCC4=CC=CC=C4Cl		Potency									6.3096	5.2		A						907			Confirmation Concentration-Response Assay for Cell signaling CRE-BLA (Fsk stim) - HEK293 CREB Luciferase												CREB-binding protein
2201235	CCOC1=NC(=NC(=N1)NCC=C)NC2=C(C=C(C=C2)OC)OC		Potency									10	5		A						907			Confirmation Concentration-Response Assay for Cell signaling CRE-BLA (Fsk stim) - HEK293 CREB Luciferase												CREB-binding protein
2612492	CC1=CC(=NO1)NC(=O)CSC2=NC(=NC3=C2C4=C(S3)CCCC4)C		Potency									4.4668	5.35		A						907			Confirmation Concentration-Response Assay for Cell signaling CRE-BLA (Fsk stim) - HEK293 CREB Luciferase												CREB-binding protein
2876179	CCN1C2=CC=CC=C2C3=C1N=C(N=N3)SCN4C(=O)C5=CC=CC=C5C4=O		Potency									1.9953	5.69999		A						907			Confirmation Concentration-Response Assay for Cell signaling CRE-BLA (Fsk stim) - HEK293 CREB Luciferase												CREB-binding protein
2997981	CC1=NN(C2=C1C=C(S2)C(=O)N3CCN(CC3)C4=CC=CC=N4)C5=CC=C(C=C5)Cl		Potency									1.4125	5.85001		A						907			Confirmation Concentration-Response Assay for Cell signaling CRE-BLA (Fsk stim) - HEK293 CREB Luciferase												CREB-binding protein
2997999	CCN1C2=CC=CC=C2C3=C1N=C(N=N3)SCC4=CC(=O)N5C=CSC5=N4		Potency									5.0119	5.3		A						907			Confirmation Concentration-Response Assay for Cell signaling CRE-BLA (Fsk stim) - HEK293 CREB Luciferase												CREB-binding protein
2999553	C1COCCN1S(=O)(=O)C2=C(C=CC(=C2)C(=O)NC3=CC=C(C=C3)C4=CN5C=CSC5=N4)F		Potency									2.8184	5.55		A						907			Confirmation Concentration-Response Assay for Cell signaling CRE-BLA (Fsk stim) - HEK293 CREB Luciferase												CREB-binding protein
3235688	CCOC1=C(C=C(C=C1)C2=NN3C(=NN=C3SC2)C4=CC=CC=C4)Cl		Potency									1.5849	5.8		A						907			Confirmation Concentration-Response Assay for Cell signaling CRE-BLA (Fsk stim) - HEK293 CREB Luciferase												CREB-binding protein
3236118	C1CN(CCN1C2=NC3=CC=CC=C3N4C2=NN=C4)C5=NC=CC=N5		Potency									7.9433	5.1		A						907			Confirmation Concentration-Response Assay for Cell signaling CRE-BLA (Fsk stim) - HEK293 CREB Luciferase												CREB-binding protein
3237807	CCOC1=CC=C(C=C1)C2=NN=C3N2N=C(C=C3)SCC4=CC=C(O4)C(=O)OC		Potency									2.2387	5.65		A						907			Confirmation Concentration-Response Assay for Cell signaling CRE-BLA (Fsk stim) - HEK293 CREB Luciferase												CREB-binding protein
3239983	CCC1=NN2C(=CC(=NC2=N1)C)NC3=CC=CC(=C3)C(F)(F)F		Potency									12.5893	4.9	4.9	N						907			Confirmation Concentration-Response Assay for Cell signaling CRE-BLA (Fsk stim) - HEK293 CREB Luciferase												CREB-binding protein
3240902	CCCN1CC2=CC=CC(=C2C1=O)C(=O)NC3=CC=C(C=C3)N4CCN(CC4)CC		Potency									7.9433	5.1		A						907			Confirmation Concentration-Response Assay for Cell signaling CRE-BLA (Fsk stim) - HEK293 CREB Luciferase												CREB-binding protein
3241227	COC1=CC(=CC(=C1OC)OC)C2=NOC(C2)C(=O)N3CCN(CC3)C4=CC=C(C=C4)F		Potency									3.9811	5.4		A						907			Confirmation Concentration-Response Assay for Cell signaling CRE-BLA (Fsk stim) - HEK293 CREB Luciferase												CREB-binding protein
3242411	CCN(C1=CC=CC=C1C)C(=O)C2=CN(C(=O)C3=CC(=C(C=C32)OC)OC)C		Potency									5.0119	5.3		A						907			Confirmation Concentration-Response Assay for Cell signaling CRE-BLA (Fsk stim) - HEK293 CREB Luciferase												CREB-binding protein
3245393	CN1C=C(C2=CC(=C(C=C2C1=O)OC)OC)C(=O)NC3=C(C=CC(=C3)OC)OC		Potency									3.9811	5.4		A						907			Confirmation Concentration-Response Assay for Cell signaling CRE-BLA (Fsk stim) - HEK293 CREB Luciferase												CREB-binding protein
3245474	COC1=C(C=C(C=C1)C2=NN=C3N2N=C(C=C3)SCC4=CC=C(O4)C(=O)OC)OC		Potency									1.9953	5.69999		A						907			Confirmation Concentration-Response Assay for Cell signaling CRE-BLA (Fsk stim) - HEK293 CREB Luciferase												CREB-binding protein
3601836	CCOC1=C(C=C(C=C1)C2C3=C(C(=O)N2C4=NC=C(C=C4)C)OC5=CC=CC=C5C3=O)OC		Potency									15.8489	4.8	4.8	N						916			Confirmation Concentration-Response Assay for Cell signaling CRE-BLA (Fsk stim)												CREB-binding protein
5307230	CCCCCOC(=O)C1=C(C2=C(N1)CC(CC2=O)C3=CC=CO3)C		Potency									0.2512	6.59998		A						916			Confirmation Concentration-Response Assay for Cell signaling CRE-BLA (Fsk stim)												CREB-binding protein
5307628	CN1C2=CC=CC=C2C3=C(C1=O)C=C(N3C)C(=O)NC4CC4		Potency									10	5		A						907			Confirmation Concentration-Response Assay for Cell signaling CRE-BLA (Fsk stim) - HEK293 CREB Luciferase												CREB-binding protein
5308052	CCN1C=C(C2=CC(=C(C=C2C1=O)OC)OC)C(=O)NC3=CC4=C(C=C3)OCCO4		Potency									0.7079	6.15003		A						907			Confirmation Concentration-Response Assay for Cell signaling CRE-BLA (Fsk stim) - HEK293 CREB Luciferase												CREB-binding protein
5309844	COC1=CC(=CC(=C1OC)OC)NC(=O)C2=C3C(=CC=C2)CN(C3=O)CC4=CN=CC=C4		Potency									0.7943	6.10002		A						907			Confirmation Concentration-Response Assay for Cell signaling CRE-BLA (Fsk stim) - HEK293 CREB Luciferase												CREB-binding protein
5310296	C1COC2=C(O1)C=CC(=C2)S(=O)(=O)NC3=CC=CC(=C3)C4=NC5=C(S4)N=CC=C5		Potency									11.2202	4.95	4.95	N						907			Confirmation Concentration-Response Assay for Cell signaling CRE-BLA (Fsk stim) - HEK293 CREB Luciferase												CREB-binding protein
5771510	CN\1C2=CC=CC=C2N/C1=C(/C#N)\C(=O)C3=CC(=C(C=C3)OC)OC		Potency									15.8489	4.8	4.8	N						916			Confirmation Concentration-Response Assay for Cell signaling CRE-BLA (Fsk stim)												CREB-binding protein
6602826	CCC1=NC2=C(C(=N1)NC3=CC4=NC=CN=C4C=C3)OC5=CC=CC=C52.Cl		Potency									1.5849	5.8		A						916			Confirmation Concentration-Response Assay for Cell signaling CRE-BLA (Fsk stim)												CREB-binding protein
6604842	CC[C@@]1(C[C@H]2C[C@](C3=C(CCN(C2)C1)C4=CC=CC=C4N3)(C5=C(C=C6C(=C5)[C@@]78CCN9[C@H]7[C@](C=CC9)([C@@H]([C@]([C@@H]8N6C)(C(=O)OC)O)C(=O)OC)CC)OC)C(=O)OC)O		Potency									0.0631	7.19997		A						916			Confirmation Concentration-Response Assay for Cell signaling CRE-BLA (Fsk stim)												CREB-binding protein
6604843	CC[C@@]1(C[C@H]2C[C@](C3=C(CCN(C2)C1)C4=CC=CC=C4N3)(C5=C(C=C6C(=C5)[C@]78CCN9[C@@H]7[C@](C=CC9)([C@H]([C@@]([C@@H]8N6C=O)(C(=O)OC)O)C(=O)OC)CC)OC)C(=O)OC)O		Potency									0.5012	6.29999		A						916			Confirmation Concentration-Response Assay for Cell signaling CRE-BLA (Fsk stim)												CREB-binding protein
7041550	CN1C2=CC=CC=C2N=C1/C(=C\3/N(C(=O)/C(=C/C4=CC(=C(C(=C4)OC)OC)OC)/S3)CC=C)/C#N		Potency									1	6		A						907			Confirmation Concentration-Response Assay for Cell signaling CRE-BLA (Fsk stim) - HEK293 CREB Luciferase												CREB-binding protein
54669868	CCOc1cc(cc(c1)c2c(C)onc2C)C(C)O	6364757	IC50						=	28100	nM		4.55		N			BAO_0000190	UO_0000065	http://www.openphacts.org/units/Nanomolar	770203	CHEMBL1832993	B	Displacement of H3K56Ac from human CREBBP by peptide displacement assay	1	Scientific Literature	Homo sapiens		9606	Autocuration	BAO_0000357	101310	CHEMBL5747	SINGLE PROTEIN	Q92793	CREB-binding protein	Homo sapiens	9	Protein			58989	CHEMBL1828554	21851057	J. Med. Chem.	2011	54	19	6761
54757750	CC(O)c1cccc(c1)c2c(C)onc2C	6364753	IC50						=	45400	nM		4.34		N			BAO_0000190	UO_0000065	http://www.openphacts.org/units/Nanomolar	770203	CHEMBL1832993	B	Displacement of H3K56Ac from human CREBBP by peptide displacement assay	1	Scientific Literature	Homo sapiens		9606	Autocuration	BAO_0000357	101310	CHEMBL5747	SINGLE PROTEIN	Q92793	CREB-binding protein	Homo sapiens	9	Protein			58989	CHEMBL1828554	21851057	J. Med. Chem.	2011	54	19	6761
13953710	Cc1nnc2C(NC(=O)OCc3ccccc3)N=C(c4ccccc4)c5ccccc5n12	12062983	Kd						>	50000	nM		4.3		N			BAO_0000034	UO_0000065	http://www.openphacts.org/units/Nanomolar	852815	CHEMBL2156122	B	Binding affinity to ATAD2 by isothermal titration calorimetric analysis	1	Scientific Literature				Autocuration	BAO_0000357	105188	CHEMBL2150837	SINGLE PROTEIN	Q6PL18	ATPase family AAA domain-containing protein 2	Homo sapiens	8	Homologous protein			65556	CHEMBL2150880	21568322	J. Med. Chem.	2011	54	11	3827
13387	CN1CCCC1=O	6365472	IC50						=	34000000	nM		1.47		N	Outside typical range		BAO_0000190	UO_0000065	http://www.openphacts.org/units/Nanomolar	770208	CHEMBL1832998	B	Inhibition of BAZ2B	1	Scientific Literature				Autocuration	BAO_0000357	104016	CHEMBL1741220	SINGLE PROTEIN	Q9UIF8	Bromodomain adjacent to zinc finger domain protein 2B	Homo sapiens	8	Homologous protein			58989	CHEMBL1828554	21851057	J. Med. Chem.	2011	54	19	6761
82316	CC(=O)c1ccc(cc1)n2ccnc2	13890244	IC50						=	826000	nM		3.08		N			BAO_0000190	UO_0000065	http://www.openphacts.org/units/Nanomolar	1286637	CHEMBL3111112	B	Displacement of biotinylated H3Kac14 peptide from His6-tagged human BAZ2B expressed in Escherichia coli BL21(DE3) after 30 mins by AlphaScreen assay	1	Scientific Literature	Homo sapiens		9606	Autocuration	BAO_0000019	104016	CHEMBL1741220	SINGLE PROTEIN	Q9UIF8	Bromodomain adjacent to zinc finger domain protein 2B	Homo sapiens	9	Protein			76677	CHEMBL3108698	24304323	J. Med. Chem.	2013	56	24	10183
648697	CC(=O)N1CCc2[nH]c3ccccc3c2C1	13890224	IC50						=	37000	nM		4.43		N			BAO_0000190	UO_0000065	http://www.openphacts.org/units/Nanomolar	1286636	CHEMBL3111111	B	Displacement of biotinylated H3Kac14 peptide from His6-tagged human BAZ2B expressed in Escherichia coli BL21(DE3) after 30 mins by AlphaLISA assay	1	Scientific Literature	Homo sapiens		9606	Autocuration	BAO_0000019	104016	CHEMBL1741220	SINGLE PROTEIN	Q9UIF8	Bromodomain adjacent to zinc finger domain protein 2B	Homo sapiens	9	Protein			76677	CHEMBL3108698	24304323	J. Med. Chem.	2013	56	24	10183
709639	CC(=O)N1CCc2[nH]c3ccc(C)cc3c2C1	13890226	IC50						=	26000	nM		4.59		N			BAO_0000190	UO_0000065	http://www.openphacts.org/units/Nanomolar	1286636	CHEMBL3111111	B	Displacement of biotinylated H3Kac14 peptide from His6-tagged human BAZ2B expressed in Escherichia coli BL21(DE3) after 30 mins by AlphaLISA assay	1	Scientific Literature	Homo sapiens		9606	Autocuration	BAO_0000019	104016	CHEMBL1741220	SINGLE PROTEIN	Q9UIF8	Bromodomain adjacent to zinc finger domain protein 2B	Homo sapiens	9	Protein			76677	CHEMBL3108698	24304323	J. Med. Chem.	2013	56	24	10183
1268265	Oc1cc(O)nc(S)n1	13890240	IC50						=	279000	nM		3.55		N			BAO_0000190	UO_0000065	http://www.openphacts.org/units/Nanomolar	1286637	CHEMBL3111112	B	Displacement of biotinylated H3Kac14 peptide from His6-tagged human BAZ2B expressed in Escherichia coli BL21(DE3) after 30 mins by AlphaScreen assay	1	Scientific Literature	Homo sapiens		9606	Autocuration	BAO_0000019	104016	CHEMBL1741220	SINGLE PROTEIN	Q9UIF8	Bromodomain adjacent to zinc finger domain protein 2B	Homo sapiens	9	Protein			76677	CHEMBL3108698	24304323	J. Med. Chem.	2013	56	24	10183
1511198	CNS(=O)(=O)c1cc(ccc1C)c2nn3c(C)nnc3c4ccccc24	13891963	IC50						>	100000	nM		4		N			BAO_0000190	UO_0000065	http://www.openphacts.org/units/Nanomolar	1287021	CHEMBL3111332	B	Displacement of H3K14(Ac) peptide from BAZ2B bromodomain (unknown origin) by AlphaScreen assay	1	Scientific Literature	Homo sapiens		9606	Autocuration	BAO_0000357	104016	CHEMBL1741220	SINGLE PROTEIN	Q9UIF8	Bromodomain adjacent to zinc finger domain protein 2B	Homo sapiens	9	Protein			76683	CHEMBL3108763	24313754	J. Med. Chem.	2014	57	2	462
1511199	CN(C)S(=O)(=O)c1cc(ccc1C)c2nn3c(C)nnc3c4ccccc24	13891962	IC50						>	100000	nM		4		N			BAO_0000190	UO_0000065	http://www.openphacts.org/units/Nanomolar	1287021	CHEMBL3111332	B	Displacement of H3K14(Ac) peptide from BAZ2B bromodomain (unknown origin) by AlphaScreen assay	1	Scientific Literature	Homo sapiens		9606	Autocuration	BAO_0000357	104016	CHEMBL1741220	SINGLE PROTEIN	Q9UIF8	Bromodomain adjacent to zinc finger domain protein 2B	Homo sapiens	9	Protein			76683	CHEMBL3108763	24313754	J. Med. Chem.	2014	57	2	462
2780190	CC(=O)Nc1ccc2C(=O)CCCc2c1	13890239	IC50						=	476000	nM		3.32		N			BAO_0000190	UO_0000065	http://www.openphacts.org/units/Nanomolar	1286637	CHEMBL3111112	B	Displacement of biotinylated H3Kac14 peptide from His6-tagged human BAZ2B expressed in Escherichia coli BL21(DE3) after 30 mins by AlphaScreen assay	1	Scientific Literature	Homo sapiens		9606	Autocuration	BAO_0000019	104016	CHEMBL1741220	SINGLE PROTEIN	Q9UIF8	Bromodomain adjacent to zinc finger domain protein 2B	Homo sapiens	9	Protein			76677	CHEMBL3108698	24304323	J. Med. Chem.	2013	56	24	10183
2796714	Cc1ncc([nH]1)C(=S)N	13890238	IC50						=	495000	nM		3.31		N			BAO_0000190	UO_0000065	http://www.openphacts.org/units/Nanomolar	1286637	CHEMBL3111112	B	Displacement of biotinylated H3Kac14 peptide from His6-tagged human BAZ2B expressed in Escherichia coli BL21(DE3) after 30 mins by AlphaScreen assay	1	Scientific Literature	Homo sapiens		9606	Autocuration	BAO_0000019	104016	CHEMBL1741220	SINGLE PROTEIN	Q9UIF8	Bromodomain adjacent to zinc finger domain protein 2B	Homo sapiens	9	Protein			76677	CHEMBL3108698	24304323	J. Med. Chem.	2013	56	24	10183
2797467	NC(=S)c1cnccn1	13890241	IC50						=	190000	nM		3.72		N			BAO_0000190	UO_0000065	http://www.openphacts.org/units/Nanomolar	1286637	CHEMBL3111112	B	Displacement of biotinylated H3Kac14 peptide from His6-tagged human BAZ2B expressed in Escherichia coli BL21(DE3) after 30 mins by AlphaScreen assay	1	Scientific Literature	Homo sapiens		9606	Autocuration	BAO_0000019	104016	CHEMBL1741220	SINGLE PROTEIN	Q9UIF8	Bromodomain adjacent to zinc finger domain protein 2B	Homo sapiens	9	Protein			76677	CHEMBL3108698	24304323	J. Med. Chem.	2013	56	24	10183
4907545	Cc1ccc(cc1NS(=O)(=O)C)c2nn3c(C)nnc3c4ccccc24	13891961	IC50						>	100000	nM		4		N			BAO_0000190	UO_0000065	http://www.openphacts.org/units/Nanomolar	1287021	CHEMBL3111332	B	Displacement of H3K14(Ac) peptide from BAZ2B bromodomain (unknown origin) by AlphaScreen assay	1	Scientific Literature	Homo sapiens		9606	Autocuration	BAO_0000357	104016	CHEMBL1741220	SINGLE PROTEIN	Q9UIF8	Bromodomain adjacent to zinc finger domain protein 2B	Homo sapiens	9	Protein			76683	CHEMBL3108763	24313754	J. Med. Chem.	2014	57	2	462
4908238	CCC(=O)Nc1cc(ccc1C)c2nn3c(C)nnc3c4ccccc24	13891964	IC50						>	100000	nM		4		N			BAO_0000190	UO_0000065	http://www.openphacts.org/units/Nanomolar	1287021	CHEMBL3111332	B	Displacement of H3K14(Ac) peptide from BAZ2B bromodomain (unknown origin) by AlphaScreen assay	1	Scientific Literature	Homo sapiens		9606	Autocuration	BAO_0000357	104016	CHEMBL1741220	SINGLE PROTEIN	Q9UIF8	Bromodomain adjacent to zinc finger domain protein 2B	Homo sapiens	9	Protein			76683	CHEMBL3108763	24313754	J. Med. Chem.	2014	57	2	462
19279808	CNC(=O)c1cc(C)n(C)n1	13890243	IC50						=	1094000	nM		2.96		N			BAO_0000190	UO_0000065	http://www.openphacts.org/units/Nanomolar	1286637	CHEMBL3111112	B	Displacement of biotinylated H3Kac14 peptide from His6-tagged human BAZ2B expressed in Escherichia coli BL21(DE3) after 30 mins by AlphaScreen assay	1	Scientific Literature	Homo sapiens		9606	Autocuration	BAO_0000019	104016	CHEMBL1741220	SINGLE PROTEIN	Q9UIF8	Bromodomain adjacent to zinc finger domain protein 2B	Homo sapiens	9	Protein			76677	CHEMBL3108698	24304323	J. Med. Chem.	2013	56	24	10183
23345022	CC(=O)N1CCc2c(C1)c3cccc4SCCn2c34	13890216	Inhibition						=	70	%		4.06695	200	N			BAO_0000201	UO_0000187	http://qudt.org/vocab/unit#Percent	1286632	CHEMBL3111107	B	Displacement of biotinylated H3Kac14 peptide from His6-tagged human BAZ2B expressed in Escherichia coli BL21(DE3) at 200 uM after 30 mins by AlphaLISA assay relative to control	1	Scientific Literature	Homo sapiens		9606	Autocuration	BAO_0000019	104016	CHEMBL1741220	SINGLE PROTEIN	Q9UIF8	Bromodomain adjacent to zinc finger domain protein 2B	Homo sapiens	9	Protein			76677	CHEMBL3108698	24304323	J. Med. Chem.	2013	56	24	10183
24229802	CNC(=O)c1ccc(nc1)c2ccccc2	13890246	IC50						=	109000	nM		3.96		N			BAO_0000190	UO_0000065	http://www.openphacts.org/units/Nanomolar	1286637	CHEMBL3111112	B	Displacement of biotinylated H3Kac14 peptide from His6-tagged human BAZ2B expressed in Escherichia coli BL21(DE3) after 30 mins by AlphaScreen assay	1	Scientific Literature	Homo sapiens		9606	Autocuration	BAO_0000019	104016	CHEMBL1741220	SINGLE PROTEIN	Q9UIF8	Bromodomain adjacent to zinc finger domain protein 2B	Homo sapiens	9	Protein			76677	CHEMBL3108698	24304323	J. Med. Chem.	2013	56	24	10183
24229807	CNC(=O)c1ccccc1OC2CCOCC2	13890247	IC50						=	38000	nM		4.42		N			BAO_0000190	UO_0000065	http://www.openphacts.org/units/Nanomolar	1286637	CHEMBL3111112	B	Displacement of biotinylated H3Kac14 peptide from His6-tagged human BAZ2B expressed in Escherichia coli BL21(DE3) after 30 mins by AlphaScreen assay	1	Scientific Literature	Homo sapiens		9606	Autocuration	BAO_0000019	104016	CHEMBL1741220	SINGLE PROTEIN	Q9UIF8	Bromodomain adjacent to zinc finger domain protein 2B	Homo sapiens	9	Protein			76677	CHEMBL3108698	24304323	J. Med. Chem.	2013	56	24	10183
29133832	CC(=O)N1CCc2[nH]c3ccc(Cl)cc3c2C1	13890237	IC50						=	24000	nM		4.62		N			BAO_0000190	UO_0000065	http://www.openphacts.org/units/Nanomolar	1286636	CHEMBL3111111	B	Displacement of biotinylated H3Kac14 peptide from His6-tagged human BAZ2B expressed in Escherichia coli BL21(DE3) after 30 mins by AlphaLISA assay	1	Scientific Literature	Homo sapiens		9606	Autocuration	BAO_0000019	104016	CHEMBL1741220	SINGLE PROTEIN	Q9UIF8	Bromodomain adjacent to zinc finger domain protein 2B	Homo sapiens	9	Protein			76677	CHEMBL3108698	24304323	J. Med. Chem.	2013	56	24	10183
29147548	COc1ccc2[nH]c3CCN(Cc3c2c1)C(=O)C	13890225	IC50						=	36000	nM		4.44		N			BAO_0000190	UO_0000065	http://www.openphacts.org/units/Nanomolar	1286636	CHEMBL3111111	B	Displacement of biotinylated H3Kac14 peptide from His6-tagged human BAZ2B expressed in Escherichia coli BL21(DE3) after 30 mins by AlphaLISA assay	1	Scientific Literature	Homo sapiens		9606	Autocuration	BAO_0000019	104016	CHEMBL1741220	SINGLE PROTEIN	Q9UIF8	Bromodomain adjacent to zinc finger domain protein 2B	Homo sapiens	9	Protein			76677	CHEMBL3108698	24304323	J. Med. Chem.	2013	56	24	10183
42582730	CC(=O)N1CCc2[nH]c3ccc(F)cc3c2C1	13890227	IC50						=	102000	nM		3.99		N			BAO_0000190	UO_0000065	http://www.openphacts.org/units/Nanomolar	1286636	CHEMBL3111111	B	Displacement of biotinylated H3Kac14 peptide from His6-tagged human BAZ2B expressed in Escherichia coli BL21(DE3) after 30 mins by AlphaLISA assay	1	Scientific Literature	Homo sapiens		9606	Autocuration	BAO_0000019	104016	CHEMBL1741220	SINGLE PROTEIN	Q9UIF8	Bromodomain adjacent to zinc finger domain protein 2B	Homo sapiens	9	Protein			76677	CHEMBL3108698	24304323	J. Med. Chem.	2013	56	24	10183
44122562	CC(=O)N1CCc2[nH]c3ccc(cc3c2C1)C(=O)O	13890210	Inhibition						=	48	%		3.66421	200	N			BAO_0000201	UO_0000187	http://qudt.org/vocab/unit#Percent	1286632	CHEMBL3111107	B	Displacement of biotinylated H3Kac14 peptide from His6-tagged human BAZ2B expressed in Escherichia coli BL21(DE3) at 200 uM after 30 mins by AlphaLISA assay relative to control	1	Scientific Literature	Homo sapiens		9606	Autocuration	BAO_0000019	104016	CHEMBL1741220	SINGLE PROTEIN	Q9UIF8	Bromodomain adjacent to zinc finger domain protein 2B	Homo sapiens	9	Protein			76677	CHEMBL3108698	24304323	J. Med. Chem.	2013	56	24	10183
47306828	CNC(=O)N1CCc2[nH]c3ccc(Cl)cc3c2C1	13890202	Kd						=	8000	nM		5.1		A			BAO_0000034	UO_0000065	http://www.openphacts.org/units/Nanomolar	1286631	CHEMBL3111106	B	Binding affinity to human BAZ2B expressed in Escherichia coli BL21(DE3) by direct isothermal titration calorimetric analysis	1	Scientific Literature	Homo sapiens		9606	Autocuration	BAO_0000019	104016	CHEMBL1741220	SINGLE PROTEIN	Q9UIF8	Bromodomain adjacent to zinc finger domain protein 2B	Homo sapiens	9	Protein			76677	CHEMBL3108698	24304323	J. Med. Chem.	2013	56	24	10183
76310336	CC(=O)N1CCc2c(C1)c3cc(Br)ccc3n2C(=O)OC(C)(C)C	13890217	Inhibition						=	38	%		3.48636	200	N			BAO_0000201	UO_0000187	http://qudt.org/vocab/unit#Percent	1286632	CHEMBL3111107	B	Displacement of biotinylated H3Kac14 peptide from His6-tagged human BAZ2B expressed in Escherichia coli BL21(DE3) at 200 uM after 30 mins by AlphaLISA assay relative to control	1	Scientific Literature	Homo sapiens		9606	Autocuration	BAO_0000019	104016	CHEMBL1741220	SINGLE PROTEIN	Q9UIF8	Bromodomain adjacent to zinc finger domain protein 2B	Homo sapiens	9	Protein			76677	CHEMBL3108698	24304323	J. Med. Chem.	2013	56	24	10183
76310337	NC(=S)N1CCc2[nH]c3ccc(Cl)cc3c2C1	13890221	IC50						>	2000000	nM		2.7		N			BAO_0000190	UO_0000065	http://www.openphacts.org/units/Nanomolar	1286636	CHEMBL3111111	B	Displacement of biotinylated H3Kac14 peptide from His6-tagged human BAZ2B expressed in Escherichia coli BL21(DE3) after 30 mins by AlphaLISA assay	1	Scientific Literature	Homo sapiens		9606	Autocuration	BAO_0000019	104016	CHEMBL1741220	SINGLE PROTEIN	Q9UIF8	Bromodomain adjacent to zinc finger domain protein 2B	Homo sapiens	9	Protein			76677	CHEMBL3108698	24304323	J. Med. Chem.	2013	56	24	10183
76310338	CNC(=O)CCn1c2CCN(Cc2c3cc(Cl)ccc13)C(=O)C	13890234	IC50						=	143000	nM		3.84		N			BAO_0000190	UO_0000065	http://www.openphacts.org/units/Nanomolar	1286636	CHEMBL3111111	B	Displacement of biotinylated H3Kac14 peptide from His6-tagged human BAZ2B expressed in Escherichia coli BL21(DE3) after 30 mins by AlphaLISA assay	1	Scientific Literature	Homo sapiens		9606	Autocuration	BAO_0000019	104016	CHEMBL1741220	SINGLE PROTEIN	Q9UIF8	Bromodomain adjacent to zinc finger domain protein 2B	Homo sapiens	9	Protein			76677	CHEMBL3108698	24304323	J. Med. Chem.	2013	56	24	10183
76314005	CN(C(=O)C)c1ccc2[nH]c3CCN(Cc3c2c1)C(=O)C	13890213	Inhibition						=	65	%		3.96782	200	N			BAO_0000201	UO_0000187	http://qudt.org/vocab/unit#Percent	1286632	CHEMBL3111107	B	Displacement of biotinylated H3Kac14 peptide from His6-tagged human BAZ2B expressed in Escherichia coli BL21(DE3) at 200 uM after 30 mins by AlphaLISA assay relative to control	1	Scientific Literature	Homo sapiens		9606	Autocuration	BAO_0000019	104016	CHEMBL1741220	SINGLE PROTEIN	Q9UIF8	Bromodomain adjacent to zinc finger domain protein 2B	Homo sapiens	9	Protein			76677	CHEMBL3108698	24304323	J. Med. Chem.	2013	56	24	10183
76314006	CNC(=O)Cn1c2CCN(Cc2c3cc(Cl)ccc13)C(=O)C	13890232	IC50						=	69000	nM		4.16		N			BAO_0000190	UO_0000065	http://www.openphacts.org/units/Nanomolar	1286636	CHEMBL3111111	B	Displacement of biotinylated H3Kac14 peptide from His6-tagged human BAZ2B expressed in Escherichia coli BL21(DE3) after 30 mins by AlphaLISA assay	1	Scientific Literature	Homo sapiens		9606	Autocuration	BAO_0000019	104016	CHEMBL1741220	SINGLE PROTEIN	Q9UIF8	Bromodomain adjacent to zinc finger domain protein 2B	Homo sapiens	9	Protein			76677	CHEMBL3108698	24304323	J. Med. Chem.	2013	56	24	10183
76317545	CC(=O)N1CCc2[nH]c3ccc(cc3c2C1)c4cccnc4	13890212	Inhibition						=	55	%		3.78612	200	N			BAO_0000201	UO_0000187	http://qudt.org/vocab/unit#Percent	1286632	CHEMBL3111107	B	Displacement of biotinylated H3Kac14 peptide from His6-tagged human BAZ2B expressed in Escherichia coli BL21(DE3) at 200 uM after 30 mins by AlphaLISA assay relative to control	1	Scientific Literature	Homo sapiens		9606	Autocuration	BAO_0000019	104016	CHEMBL1741220	SINGLE PROTEIN	Q9UIF8	Bromodomain adjacent to zinc finger domain protein 2B	Homo sapiens	9	Protein			76677	CHEMBL3108698	24304323	J. Med. Chem.	2013	56	24	10183
76317546	CC(=O)N1CCc2c(C1)c3cc(Cl)ccc3n2C	13890236	IC50						=	25000	nM		4.6		N			BAO_0000190	UO_0000065	http://www.openphacts.org/units/Nanomolar	1286636	CHEMBL3111111	B	Displacement of biotinylated H3Kac14 peptide from His6-tagged human BAZ2B expressed in Escherichia coli BL21(DE3) after 30 mins by AlphaLISA assay	1	Scientific Literature	Homo sapiens		9606	Autocuration	BAO_0000019	104016	CHEMBL1741220	SINGLE PROTEIN	Q9UIF8	Bromodomain adjacent to zinc finger domain protein 2B	Homo sapiens	9	Protein			76677	CHEMBL3108698	24304323	J. Med. Chem.	2013	56	24	10183
76317547	CC(=O)N1CCc2[nH]c3ccc(N)cc3c2C1	13890208	Kd						=	336000	nM		3.47		N			BAO_0000034	UO_0000065	http://www.openphacts.org/units/Nanomolar	1286630	CHEMBL3111105	B	Binding affinity to human BAZ2B expressed in Escherichia coli BL21(DE3) by competitive isothermal titration calorimetric analysis	1	Scientific Literature	Homo sapiens		9606	Autocuration	BAO_0000019	104016	CHEMBL1741220	SINGLE PROTEIN	Q9UIF8	Bromodomain adjacent to zinc finger domain protein 2B	Homo sapiens	9	Protein			76677	CHEMBL3108698	24304323	J. Med. Chem.	2013	56	24	10183
76317548	CNS(=O)(=O)c1ccc2[nH]c3CCN(Cc3c2c1)C(=O)C	13890229	IC50						=	55000	nM		4.26		N			BAO_0000190	UO_0000065	http://www.openphacts.org/units/Nanomolar	1286636	CHEMBL3111111	B	Displacement of biotinylated H3Kac14 peptide from His6-tagged human BAZ2B expressed in Escherichia coli BL21(DE3) after 30 mins by AlphaLISA assay	1	Scientific Literature	Homo sapiens		9606	Autocuration	BAO_0000019	104016	CHEMBL1741220	SINGLE PROTEIN	Q9UIF8	Bromodomain adjacent to zinc finger domain protein 2B	Homo sapiens	9	Protein			76677	CHEMBL3108698	24304323	J. Med. Chem.	2013	56	24	10183
76317549	CC(=O)N1CCc2[nH]c3ccc(NS(=O)(=O)C)cc3c2C1	13890228	IC50						>	1000000	nM		3		N			BAO_0000190	UO_0000065	http://www.openphacts.org/units/Nanomolar	1286636	CHEMBL3111111	B	Displacement of biotinylated H3Kac14 peptide from His6-tagged human BAZ2B expressed in Escherichia coli BL21(DE3) after 30 mins by AlphaLISA assay	1	Scientific Literature	Homo sapiens		9606	Autocuration	BAO_0000019	104016	CHEMBL1741220	SINGLE PROTEIN	Q9UIF8	Bromodomain adjacent to zinc finger domain protein 2B	Homo sapiens	9	Protein			76677	CHEMBL3108698	24304323	J. Med. Chem.	2013	56	24	10183
76317550	CC(=O)N1CCc2[nH]c3ccc(cc3c2C1)[N+](=O)[O-]	13890206	Kd						=	694000	nM		3.16		N			BAO_0000034	UO_0000065	http://www.openphacts.org/units/Nanomolar	1286630	CHEMBL3111105	B	Binding affinity to human BAZ2B expressed in Escherichia coli BL21(DE3) by competitive isothermal titration calorimetric analysis	1	Scientific Literature	Homo sapiens		9606	Autocuration	BAO_0000019	104016	CHEMBL1741220	SINGLE PROTEIN	Q9UIF8	Bromodomain adjacent to zinc finger domain protein 2B	Homo sapiens	9	Protein			76677	CHEMBL3108698	24304323	J. Med. Chem.	2013	56	24	10183
76321282	CC(=O)N1CCc2c(C1)c3cc(Cl)ccc3n2CC(=O)O	13890233	IC50						=	152000	nM		3.82		N			BAO_0000190	UO_0000065	http://www.openphacts.org/units/Nanomolar	1286636	CHEMBL3111111	B	Displacement of biotinylated H3Kac14 peptide from His6-tagged human BAZ2B expressed in Escherichia coli BL21(DE3) after 30 mins by AlphaLISA assay	1	Scientific Literature	Homo sapiens		9606	Autocuration	BAO_0000019	104016	CHEMBL1741220	SINGLE PROTEIN	Q9UIF8	Bromodomain adjacent to zinc finger domain protein 2B	Homo sapiens	9	Protein			76677	CHEMBL3108698	24304323	J. Med. Chem.	2013	56	24	10183
76321283	CNc1ccc2[nH]c3CCN(Cc3c2c1)C(=O)C	13890207	Kd						=	274000	nM		3.56		N			BAO_0000034	UO_0000065	http://www.openphacts.org/units/Nanomolar	1286630	CHEMBL3111105	B	Binding affinity to human BAZ2B expressed in Escherichia coli BL21(DE3) by competitive isothermal titration calorimetric analysis	1	Scientific Literature	Homo sapiens		9606	Autocuration	BAO_0000019	104016	CHEMBL1741220	SINGLE PROTEIN	Q9UIF8	Bromodomain adjacent to zinc finger domain protein 2B	Homo sapiens	9	Protein			76677	CHEMBL3108698	24304323	J. Med. Chem.	2013	56	24	10183
76321284	CC(=O)N1CCc2[nH]c3ccc(cc3c2C1)S(=O)(=O)N	13890231	IC50						=	46000	nM		4.34		N			BAO_0000190	UO_0000065	http://www.openphacts.org/units/Nanomolar	1286636	CHEMBL3111111	B	Displacement of biotinylated H3Kac14 peptide from His6-tagged human BAZ2B expressed in Escherichia coli BL21(DE3) after 30 mins by AlphaLISA assay	1	Scientific Literature	Homo sapiens		9606	Autocuration	BAO_0000019	104016	CHEMBL1741220	SINGLE PROTEIN	Q9UIF8	Bromodomain adjacent to zinc finger domain protein 2B	Homo sapiens	9	Protein			76677	CHEMBL3108698	24304323	J. Med. Chem.	2013	56	24	10183
76324894	CN1CC(=O)n2c3CCN(Cc3c4cccc1c24)C(=O)C	13890215	Inhibition						=	63	%		3.93011	200	N			BAO_0000201	UO_0000187	http://qudt.org/vocab/unit#Percent	1286632	CHEMBL3111107	B	Displacement of biotinylated H3Kac14 peptide from His6-tagged human BAZ2B expressed in Escherichia coli BL21(DE3) at 200 uM after 30 mins by AlphaLISA assay relative to control	1	Scientific Literature	Homo sapiens		9606	Autocuration	BAO_0000019	104016	CHEMBL1741220	SINGLE PROTEIN	Q9UIF8	Bromodomain adjacent to zinc finger domain protein 2B	Homo sapiens	9	Protein			76677	CHEMBL3108698	24304323	J. Med. Chem.	2013	56	24	10183
76324895	CC(=S)N1CCc2[nH]c3ccc(Cl)cc3c2C1	13890203	Kd						>	100000	nM		4		N			BAO_0000034	UO_0000065	http://www.openphacts.org/units/Nanomolar	1286631	CHEMBL3111106	B	Binding affinity to human BAZ2B expressed in Escherichia coli BL21(DE3) by direct isothermal titration calorimetric analysis	1	Scientific Literature	Homo sapiens		9606	Autocuration	BAO_0000019	104016	CHEMBL1741220	SINGLE PROTEIN	Q9UIF8	Bromodomain adjacent to zinc finger domain protein 2B	Homo sapiens	9	Protein			76677	CHEMBL3108698	24304323	J. Med. Chem.	2013	56	24	10183
76324896	CC(=O)N1CCc2c(C1)c3cc(Cl)ccc3n2CCC(=O)O	13890235	IC50						=	66000	nM		4.18		N			BAO_0000190	UO_0000065	http://www.openphacts.org/units/Nanomolar	1286636	CHEMBL3111111	B	Displacement of biotinylated H3Kac14 peptide from His6-tagged human BAZ2B expressed in Escherichia coli BL21(DE3) after 30 mins by AlphaLISA assay	1	Scientific Literature	Homo sapiens		9606	Autocuration	BAO_0000019	104016	CHEMBL1741220	SINGLE PROTEIN	Q9UIF8	Bromodomain adjacent to zinc finger domain protein 2B	Homo sapiens	9	Protein			76677	CHEMBL3108698	24304323	J. Med. Chem.	2013	56	24	10183
76324897	CCNS(=O)(=O)c1ccc2[nH]c3CCN(Cc3c2c1)C(=O)C	13890230	IC50						=	50000	nM		4.3		N			BAO_0000190	UO_0000065	http://www.openphacts.org/units/Nanomolar	1286636	CHEMBL3111111	B	Displacement of biotinylated H3Kac14 peptide from His6-tagged human BAZ2B expressed in Escherichia coli BL21(DE3) after 30 mins by AlphaLISA assay	1	Scientific Literature	Homo sapiens		9606	Autocuration	BAO_0000019	104016	CHEMBL1741220	SINGLE PROTEIN	Q9UIF8	Bromodomain adjacent to zinc finger domain protein 2B	Homo sapiens	9	Protein			76677	CHEMBL3108698	24304323	J. Med. Chem.	2013	56	24	10183
76332139	CC(=O)N1CCc2[nH]c3c(Cl)ccc(O)c3c2C1	13890214	Inhibition						=	52	%		3.73373	200	N			BAO_0000201	UO_0000187	http://qudt.org/vocab/unit#Percent	1286632	CHEMBL3111107	B	Displacement of biotinylated H3Kac14 peptide from His6-tagged human BAZ2B expressed in Escherichia coli BL21(DE3) at 200 uM after 30 mins by AlphaLISA assay relative to control	1	Scientific Literature	Homo sapiens		9606	Autocuration	BAO_0000019	104016	CHEMBL1741220	SINGLE PROTEIN	Q9UIF8	Bromodomain adjacent to zinc finger domain protein 2B	Homo sapiens	9	Protein			76677	CHEMBL3108698	24304323	J. Med. Chem.	2013	56	24	10183
76332140	CC(=O)N1CCc2[nH]c3ccc(Oc4ccccc4)cc3c2C1	13890211	Inhibition						=	65	%		3.96782	200	N			BAO_0000201	UO_0000187	http://qudt.org/vocab/unit#Percent	1286632	CHEMBL3111107	B	Displacement of biotinylated H3Kac14 peptide from His6-tagged human BAZ2B expressed in Escherichia coli BL21(DE3) at 200 uM after 30 mins by AlphaLISA assay relative to control	1	Scientific Literature	Homo sapiens		9606	Autocuration	BAO_0000019	104016	CHEMBL1741220	SINGLE PROTEIN	Q9UIF8	Bromodomain adjacent to zinc finger domain protein 2B	Homo sapiens	9	Protein			76677	CHEMBL3108698	24304323	J. Med. Chem.	2013	56	24	10183
76335752	CC(=O)N1CCc2c(C1)c3cc(Br)ccc3n2C(=O)C	13890222	IC50						=	37000	nM		4.43		N			BAO_0000190	UO_0000065	http://www.openphacts.org/units/Nanomolar	1286636	CHEMBL3111111	B	Displacement of biotinylated H3Kac14 peptide from His6-tagged human BAZ2B expressed in Escherichia coli BL21(DE3) after 30 mins by AlphaLISA assay	1	Scientific Literature	Homo sapiens		9606	Autocuration	BAO_0000019	104016	CHEMBL1741220	SINGLE PROTEIN	Q9UIF8	Bromodomain adjacent to zinc finger domain protein 2B	Homo sapiens	9	Protein			76677	CHEMBL3108698	24304323	J. Med. Chem.	2013	56	24	10183
76335753	CC(=O)N1CCc2c(C1)c3cc(Br)ccc3n2S(=O)(=O)c4ccc(C)cc4	13890218	Inhibition						=	60	%		3.87506	200	N			BAO_0000201	UO_0000187	http://qudt.org/vocab/unit#Percent	1286632	CHEMBL3111107	B	Displacement of biotinylated H3Kac14 peptide from His6-tagged human BAZ2B expressed in Escherichia coli BL21(DE3) at 200 uM after 30 mins by AlphaLISA assay relative to control	1	Scientific Literature	Homo sapiens		9606	Autocuration	BAO_0000019	104016	CHEMBL1741220	SINGLE PROTEIN	Q9UIF8	Bromodomain adjacent to zinc finger domain protein 2B	Homo sapiens	9	Protein			76677	CHEMBL3108698	24304323	J. Med. Chem.	2013	56	24	10183
76335754	CNC(=O)N1CCc2[nH]c3ccc(Br)cc3c2C1	13890219	IC50						=	14000	nM		4.85		N			BAO_0000190	UO_0000065	http://www.openphacts.org/units/Nanomolar	1286636	CHEMBL3111111	B	Displacement of biotinylated H3Kac14 peptide from His6-tagged human BAZ2B expressed in Escherichia coli BL21(DE3) after 30 mins by AlphaLISA assay	1	Scientific Literature	Homo sapiens		9606	Autocuration	BAO_0000019	104016	CHEMBL1741220	SINGLE PROTEIN	Q9UIF8	Bromodomain adjacent to zinc finger domain protein 2B	Homo sapiens	9	Protein			76677	CHEMBL3108698	24304323	J. Med. Chem.	2013	56	24	10183
A419	Cc1cc(N=Nc2ccc(cc2)S(=O)(=O)Nc3ccccn3)c(N)c(C)c1O	13826946	Ki						=	2260	nM		5.64589		A			BAO_0000192	UO_0000065	http://www.openphacts.org/units/Nanomolar	1277426	CHEMBL3089616	B	Displacement of fluorescein-labeled MS239 from recombinant human BAZ2b after 1 hr by fluorescence anisotropy assay	1	Scientific Literature	Homo sapiens		9606	Autocuration	BAO_0000357	104016	CHEMBL1741220	SINGLE PROTEIN	Q9UIF8	Bromodomain adjacent to zinc finger domain protein 2B	Homo sapiens	9	Protein			76008	CHEMBL3085768	24144283	J. Med. Chem.	2013	56	22	9251
A470	Cc1cc(N=Nc2ccc(cc2)S(=O)(=O)Nc3ccccn3)c(N)cc1O	13826947	Ki						=	3290	nM		5.4828		A			BAO_0000192	UO_0000065	http://www.openphacts.org/units/Nanomolar	1277426	CHEMBL3089616	B	Displacement of fluorescein-labeled MS239 from recombinant human BAZ2b after 1 hr by fluorescence anisotropy assay	1	Scientific Literature	Homo sapiens		9606	Autocuration	BAO_0000357	104016	CHEMBL1741220	SINGLE PROTEIN	Q9UIF8	Bromodomain adjacent to zinc finger domain protein 2B	Homo sapiens	9	Protein			76008	CHEMBL3085768	24144283	J. Med. Chem.	2013	56	22	9251
A471	Cc1cc(N=Nc2ccc(cc2)S(=O)(=O)Nc3ccccn3)c(N)c(Cl)c1O	13826945	Ki						=	3300	nM		5.48149		A			BAO_0000192	UO_0000065	http://www.openphacts.org/units/Nanomolar	1277426	CHEMBL3089616	B	Displacement of fluorescein-labeled MS239 from recombinant human BAZ2b after 1 hr by fluorescence anisotropy assay	1	Scientific Literature	Homo sapiens		9606	Autocuration	BAO_0000357	104016	CHEMBL1741220	SINGLE PROTEIN	Q9UIF8	Bromodomain adjacent to zinc finger domain protein 2B	Homo sapiens	9	Protein			76008	CHEMBL3085768	24144283	J. Med. Chem.	2013	56	22	9251
A387	Cc1cc(N=Nc2ccc(cc2)S(=O)(=O)Nc3ccccn3)c(N)c(Cl)c1O	13826948	Ki						=	1620	nM		5.79048		A			BAO_0000192	UO_0000065	http://www.openphacts.org/units/Nanomolar	1277427	CHEMBL3089617	B	Displacement of fluorescein-labeled MS239 from recombinant human BPTF after 1 hr by fluorescence anisotropy assay	1	Scientific Literature	Homo sapiens		9606	Autocuration	BAO_0000357	107969	CHEMBL3085621	SINGLE PROTEIN	Q12830	Nucleosome-remodeling factor subunit BPTF	Homo sapiens	9	Protein			76008	CHEMBL3085768	24144283	J. Med. Chem.	2013	56	22	9251
A390	Cc1cc(N=Nc2ccc(cc2)S(=O)(=O)Nc3ccccn3)c(N)c(C)c1O	13826949	Ki						<	1700	nM		5.76955		A			BAO_0000192	UO_0000065	http://www.openphacts.org/units/Nanomolar	1277427	CHEMBL3089617	B	Displacement of fluorescein-labeled MS239 from recombinant human BPTF after 1 hr by fluorescence anisotropy assay	1	Scientific Literature	Homo sapiens		9606	Autocuration	BAO_0000357	107969	CHEMBL3085621	SINGLE PROTEIN	Q12830	Nucleosome-remodeling factor subunit BPTF	Homo sapiens	9	Protein			76008	CHEMBL3085768	24144283	J. Med. Chem.	2013	56	22	9251
A553	Cc1cc(N=Nc2ccc(cc2)S(=O)(=O)Nc3ccccn3)c(N)cc1O	13826950	Ki						=	6060	nM		5.21753		A			BAO_0000192	UO_0000065	http://www.openphacts.org/units/Nanomolar	1277427	CHEMBL3089617	B	Displacement of fluorescein-labeled MS239 from recombinant human BPTF after 1 hr by fluorescence anisotropy assay	1	Scientific Literature	Homo sapiens		9606	Autocuration	BAO_0000357	107969	CHEMBL3085621	SINGLE PROTEIN	Q12830	Nucleosome-remodeling factor subunit BPTF	Homo sapiens	9	Protein			76008	CHEMBL3085768	24144283	J. Med. Chem.	2013	56	22	9251
2824992	CN1C(=O)CC(NC2=CC=CC=C21)C3=CC=CC=C3														N						1141841			Binding affinity to BRD1 (unknown origin) by thermal shift assay												Bromodomain-containing protein 1
11128828	CCC1=CC2=C(N1CC3=CC=CC=C3)CCCC2=O														N						1141841			Binding affinity to BRD1 (unknown origin) by thermal shift assay												Bromodomain-containing protein 1
672548	CN1C(=S)N(CCSc2nc3ccccc3[nH]2)c4ccccc14	13477949	IC50						=	28000	nM		4.55		N			BAO_0000190	UO_0000065	http://www.openphacts.org/units/Nanomolar	988296	CHEMBL2439862	B	Inhibition of first bromodomain of BRD2 (unknown origin)	1	Scientific Literature	Homo sapiens		9606	Autocuration	BAO_0000357	103722	CHEMBL1293289	SINGLE PROTEIN	P25440	Bromodomain-containing protein 2	Homo sapiens	9	Protein			75196	CHEMBL2434916	24090311	J. Med. Chem.	2013	56	20	8073
5325760	Cc1onc(C)c1c2ccccc2	6364741	IC50						=	34300	nM		4.46		N			BAO_0000190	UO_0000065	http://www.openphacts.org/units/Nanomolar	770205	CHEMBL1832995	B	Displacement of H4Ac4 peptide from first bromodomain of human BRD2 by peptide displacement assay	1	Scientific Literature	Homo sapiens		9606	Autocuration	BAO_0000357	103722	CHEMBL1293289	SINGLE PROTEIN	P25440	Bromodomain-containing protein 2	Homo sapiens	9	Protein			58989	CHEMBL1828554	21851057	J. Med. Chem.	2011	54	19	6761
13953710	Cc1nnc2C(NC(=O)OCc3ccccc3)N=C(c4ccccc4)c5ccccc5n12	12062962	Kd						=	46	nM		7.34		A			BAO_0000034	UO_0000065	http://www.openphacts.org/units/Nanomolar	852819	CHEMBL2156126	B	Binding affinity to N-terminal portion of human Brd2 containing bromodomain BD1 expressed in Escherichia coli at 16 degC by isothermal titration calorimetric analysis	1	Scientific Literature	Homo sapiens		9606	Autocuration	BAO_0000019	103722	CHEMBL1293289	SINGLE PROTEIN	P25440	Bromodomain-containing protein 2	Homo sapiens	9	Protein			65556	CHEMBL2150880	21568322	J. Med. Chem.	2011	54	11	3827
39791103	CN1Cc2cc(ccc2NC1=O)c3c(C)onc3C	6365474	IC50						=	3000	nM		5.52		A			BAO_0000190	UO_0000065	http://www.openphacts.org/units/Nanomolar	770210	CHEMBL1833000	B	Inhibition of first bromodomain of BRD2	1	Scientific Literature				Autocuration	BAO_0000357	103722	CHEMBL1293289	SINGLE PROTEIN	P25440	Bromodomain-containing protein 2	Homo sapiens	8	Homologous protein			58989	CHEMBL1828554	21851057	J. Med. Chem.	2011	54	19	6761
44243549	CC(=O)c1cccc(c1)c2c(C)onc2C	6364742	IC50						=	6000	nM		5.22		A			BAO_0000190	UO_0000065	http://www.openphacts.org/units/Nanomolar	770205	CHEMBL1832995	B	Displacement of H4Ac4 peptide from first bromodomain of human BRD2 by peptide displacement assay	1	Scientific Literature	Homo sapiens		9606	Autocuration	BAO_0000357	103722	CHEMBL1293289	SINGLE PROTEIN	P25440	Bromodomain-containing protein 2	Homo sapiens	9	Protein			58989	CHEMBL1828554	21851057	J. Med. Chem.	2011	54	19	6761
46907787	Cc1sc2c(C(=N[C@@H](CC(=O)OC(C)(C)C)c3nnc(C)n23)c4ccc(Cl)cc4)c1C	8046385	Kd						=	128.4	nM		6.89		A			BAO_0000034	UO_0000065	http://www.openphacts.org/units/Nanomolar	807436	CHEMBL1960807	B	Binding affinity to BRD2-BD1 by isothermal titration calorimetry	1	Scientific Literature				Autocuration	BAO_0000357	103722	CHEMBL1293289	SINGLE PROTEIN	P25440	Bromodomain-containing protein 2	Homo sapiens	8	Homologous protein			61257	CHEMBL1955852	22316554	Bioorg. Med. Chem.	2012	20	6	1887
46943432	CCNC(=O)C[C@@H]1N=C(c2ccc(Cl)cc2)c3cc(OC)ccc3n4c(C)nnc14	8046401	IC50						=	32.5	nM		7.49		A		1	BAO_0000190	UO_0000065	http://www.openphacts.org/units/Nanomolar	807449	CHEMBL1958571	B	Displacement of acetylated histone peptide from BRD2-BD1,2 by FRET assay	1	Scientific Literature				Autocuration	BAO_0000357	103722	CHEMBL1293289	SINGLE PROTEIN	P25440	Bromodomain-containing protein 2	Homo sapiens	8	Homologous protein			61257	CHEMBL1955852	22316554	Bioorg. Med. Chem.	2012	20	6	1887
53308655	CCOc1cc(cc(c1)c2c(C)onc2C)C(=O)O	6364746	IC50						=	28200	nM		4.55		N			BAO_0000190	UO_0000065	http://www.openphacts.org/units/Nanomolar	770205	CHEMBL1832995	B	Displacement of H4Ac4 peptide from first bromodomain of human BRD2 by peptide displacement assay	1	Scientific Literature	Homo sapiens		9606	Autocuration	BAO_0000357	103722	CHEMBL1293289	SINGLE PROTEIN	P25440	Bromodomain-containing protein 2	Homo sapiens	9	Protein			58989	CHEMBL1828554	21851057	J. Med. Chem.	2011	54	19	6761
54757749	CCOc1cccc(c1)c2c(C)onc2C	6364743	IC50						=	7400	nM		5.13		A			BAO_0000190	UO_0000065	http://www.openphacts.org/units/Nanomolar	770205	CHEMBL1832995	B	Displacement of H4Ac4 peptide from first bromodomain of human BRD2 by peptide displacement assay	1	Scientific Literature	Homo sapiens		9606	Autocuration	BAO_0000357	103722	CHEMBL1293289	SINGLE PROTEIN	P25440	Bromodomain-containing protein 2	Homo sapiens	9	Protein			58989	CHEMBL1828554	21851057	J. Med. Chem.	2011	54	19	6761
54757750	CC(O)c1cccc(c1)c2c(C)onc2C	6364744	IC50						=	4200	nM		5.38		A			BAO_0000190	UO_0000065	http://www.openphacts.org/units/Nanomolar	770205	CHEMBL1832995	B	Displacement of H4Ac4 peptide from first bromodomain of human BRD2 by peptide displacement assay	1	Scientific Literature	Homo sapiens		9606	Autocuration	BAO_0000357	103722	CHEMBL1293289	SINGLE PROTEIN	P25440	Bromodomain-containing protein 2	Homo sapiens	9	Protein			58989	CHEMBL1828554	21851057	J. Med. Chem.	2011	54	19	6761
54757751	CCOC(=O)c1cc(OCC)cc(c1)c2c(C)onc2C	6364745	IC50						=	3300	nM		5.48		A			BAO_0000190	UO_0000065	http://www.openphacts.org/units/Nanomolar	770205	CHEMBL1832995	B	Displacement of H4Ac4 peptide from first bromodomain of human BRD2 by peptide displacement assay	1	Scientific Literature	Homo sapiens		9606	Autocuration	BAO_0000357	103722	CHEMBL1293289	SINGLE PROTEIN	P25440	Bromodomain-containing protein 2	Homo sapiens	9	Protein			58989	CHEMBL1828554	21851057	J. Med. Chem.	2011	54	19	6761
54757752	CCOc1cc(cc(c1)c2c(C)onc2C)C(=O)C	6364747	IC50						=	2300	nM		5.64		A			BAO_0000190	UO_0000065	http://www.openphacts.org/units/Nanomolar	770205	CHEMBL1832995	B	Displacement of H4Ac4 peptide from first bromodomain of human BRD2 by peptide displacement assay	1	Scientific Literature	Homo sapiens		9606	Autocuration	BAO_0000357	103722	CHEMBL1293289	SINGLE PROTEIN	P25440	Bromodomain-containing protein 2	Homo sapiens	9	Protein			58989	CHEMBL1828554	21851057	J. Med. Chem.	2011	54	19	6761
13953710	Cc1nnc2C(NC(=O)OCc3ccccc3)N=C(c4ccccc4)c5ccccc5n12	12062963	Kd						=	52.5	nM		7.28		A			BAO_0000034	UO_0000065	http://www.openphacts.org/units/Nanomolar	852808	CHEMBL2156115	B	Binding affinity to N-terminal portion of human Brd2 containing bromodomain BD2 expressed in Escherichia coli at 26 degC by isothermal titration calorimetric analysis	1	Scientific Literature	Homo sapiens		9606	Autocuration	BAO_0000019	103722	CHEMBL1293289	SINGLE PROTEIN	P25440	Bromodomain-containing protein 2	Homo sapiens	9	Protein			65556	CHEMBL2150880	21568322	J. Med. Chem.	2011	54	11	3827
46943432	CCNC(=O)C[C@@H]1N=C(c2ccc(Cl)cc2)c3cc(OC)ccc3n4c(C)nnc14	8046399	Kd						=	50.5	nM		7.3		A			BAO_0000034	UO_0000065	http://www.openphacts.org/units/Nanomolar	807443	CHEMBL1958565	B	Binding affinity to BRD3-BD1,2 by isothermal titration calorimetry	1	Scientific Literature				Autocuration	BAO_0000357	104266	CHEMBL1795186	SINGLE PROTEIN	Q15059	Bromodomain-containing protein 3	Homo sapiens	8	Homologous protein			61257	CHEMBL1955852	22316554	Bioorg. Med. Chem.	2012	20	6	1887
53318989	Cc1nnc2[C@H](NC(=O)OCc3ccccc3)N=C(c4ccccc4)c5ccccc5n12	8046405	Kd						=	46	nM		7.34		A			BAO_0000034	UO_0000065	http://www.openphacts.org/units/Nanomolar	807443	CHEMBL1958565	B	Binding affinity to BRD3-BD1,2 by isothermal titration calorimetry	1	Scientific Literature				Autocuration	BAO_0000357	104266	CHEMBL1795186	SINGLE PROTEIN	Q15059	Bromodomain-containing protein 3	Homo sapiens	8	Homologous protein			61257	CHEMBL1955852	22316554	Bioorg. Med. Chem.	2012	20	6	1887
60171584	CC1=CC(=NNC2=CC=C(C=C2)S(=O)(=O)NC3=CC=CC=N3)C=C(C1=O)C		Ki									1.64	5.78516		A						1054705			Displacement of fluorescein-labeled MS574 from recombinant human BRD3 BrD1 after 1 hr by fluorescence anisotropy assay												Bromodomain-containing protein 3
73386670	CC1=C/C(=N\NC2=CC=C(C=C2)S(=O)(=O)NC3=CC=CC=N3)/C(=CC1=O)N		Ki									0.1	7		A						1054705			Displacement of fluorescein-labeled MS574 from recombinant human BRD3 BrD1 after 1 hr by fluorescence anisotropy assay												Bromodomain-containing protein 3
73386671	CC1=C/C(=N\NC2=CC=C(C=C2)S(=O)(=O)NC3=CC=CC=N3)/C(=C(C1=O)C)N		Ki									0.29	6.5376		A						1054705			Displacement of fluorescein-labeled MS574 from recombinant human BRD3 BrD1 after 1 hr by fluorescence anisotropy assay												Bromodomain-containing protein 3
76331639	CC1=C/C(=N\NC2=CC=C(C=C2)S(=O)(=O)NC3=CC=CC=N3)/C(=C(C1=O)Cl)N		Ki									0.24	6.61979		A						1054705			Displacement of fluorescein-labeled MS574 from recombinant human BRD3 BrD1 after 1 hr by fluorescence anisotropy assay												Bromodomain-containing protein 3
A470	Cc1cc(N=Nc2ccc(cc2)S(=O)(=O)Nc3ccccn3)c(N)cc1O	13826939	Ki						=	100	nM		7		A			BAO_0000192	UO_0000065	http://www.openphacts.org/units/Nanomolar	1277424	CHEMBL3089614	B	Displacement of fluorescein-labeled MS574 from recombinant human BRD3 BrD1 after 1 hr by fluorescence anisotropy assay	1	Scientific Literature	Homo sapiens		9606	Autocuration	BAO_0000357	104266	CHEMBL1795186	SINGLE PROTEIN	Q15059	Bromodomain-containing protein 3	Homo sapiens	9	Protein			76008	CHEMBL3085768	24144283	J. Med. Chem.	2013	56	22	9251
A471	Cc1cc(N=Nc2ccc(cc2)S(=O)(=O)Nc3ccccn3)c(N)c(Cl)c1O	13826937	Ki						=	240	nM		6.61979		A			BAO_0000192	UO_0000065	http://www.openphacts.org/units/Nanomolar	1277424	CHEMBL3089614	B	Displacement of fluorescein-labeled MS574 from recombinant human BRD3 BrD1 after 1 hr by fluorescence anisotropy assay	1	Scientific Literature	Homo sapiens		9606	Autocuration	BAO_0000357	104266	CHEMBL1795186	SINGLE PROTEIN	Q15059	Bromodomain-containing protein 3	Homo sapiens	9	Protein			76008	CHEMBL3085768	24144283	J. Med. Chem.	2013	56	22	9251
A419	Cc1cc(N=Nc2ccc(cc2)S(=O)(=O)Nc3ccccn3)c(N)c(C)c1O	13826938	Ki						=	290	nM		6.5376		A			BAO_0000192	UO_0000065	http://www.openphacts.org/units/Nanomolar	1277424	CHEMBL3089614	B	Displacement of fluorescein-labeled MS574 from recombinant human BRD3 BrD1 after 1 hr by fluorescence anisotropy assay	1	Scientific Literature	Homo sapiens		9606	Autocuration	BAO_0000357	104266	CHEMBL1795186	SINGLE PROTEIN	Q15059	Bromodomain-containing protein 3	Homo sapiens	9	Protein			76008	CHEMBL3085768	24144283	J. Med. Chem.	2013	56	22	9251
A388	Cc1cc(cc(C)c1O)N=Nc2ccc(cc2)S(=O)(=O)Nc3ccccn3	13826940	Ki						=	1640	nM		5.78516		A			BAO_0000192	UO_0000065	http://www.openphacts.org/units/Nanomolar	1277424	CHEMBL3089614	B	Displacement of fluorescein-labeled MS574 from recombinant human BRD3 BrD1 after 1 hr by fluorescence anisotropy assay	1	Scientific Literature	Homo sapiens		9606	Autocuration	BAO_0000357	104266	CHEMBL1795186	SINGLE PROTEIN	Q15059	Bromodomain-containing protein 3	Homo sapiens	9	Protein			76008	CHEMBL3085768	24144283	J. Med. Chem.	2013	56	22	9251
60171584	CC1=CC(=NNC2=CC=C(C=C2)S(=O)(=O)NC3=CC=CC=N3)C=C(C1=O)C		Ki									2.48	5.60555		A						1054715			Displacement of fluorescein-labeled MS574 from recombinant human BRD3 BrD2 after 1 hr by fluorescence anisotropy assay												Bromodomain-containing protein 3
73386670	CC1=C/C(=N\NC2=CC=C(C=C2)S(=O)(=O)NC3=CC=CC=N3)/C(=CC1=O)N		Ki									0.14	6.85387		A						1054715			Displacement of fluorescein-labeled MS574 from recombinant human BRD3 BrD2 after 1 hr by fluorescence anisotropy assay												Bromodomain-containing protein 3
73386671	CC1=C/C(=N\NC2=CC=C(C=C2)S(=O)(=O)NC3=CC=CC=N3)/C(=C(C1=O)C)N		Ki									0.22	6.65758		A						1054715			Displacement of fluorescein-labeled MS574 from recombinant human BRD3 BrD2 after 1 hr by fluorescence anisotropy assay												Bromodomain-containing protein 3
76331639	CC1=C/C(=N\NC2=CC=C(C=C2)S(=O)(=O)NC3=CC=CC=N3)/C(=C(C1=O)Cl)N		Ki									0.32	6.49485		A						1054715			Displacement of fluorescein-labeled MS574 from recombinant human BRD3 BrD2 after 1 hr by fluorescence anisotropy assay												Bromodomain-containing protein 3
A470	Cc1cc(N=Nc2ccc(cc2)S(=O)(=O)Nc3ccccn3)c(N)cc1O	13826159	Ki						=	140	nM		6.85387		A			BAO_0000192	UO_0000065	http://www.openphacts.org/units/Nanomolar	1277434	CHEMBL3089624	B	Displacement of fluorescein-labeled MS574 from recombinant human BRD3 BrD2 after 1 hr by fluorescence anisotropy assay	1	Scientific Literature	Homo sapiens		9606	Autocuration	BAO_0000357	104266	CHEMBL1795186	SINGLE PROTEIN	Q15059	Bromodomain-containing protein 3	Homo sapiens	9	Protein			76008	CHEMBL3085768	24144283	J. Med. Chem.	2013	56	22	9251
A419	Cc1cc(N=Nc2ccc(cc2)S(=O)(=O)Nc3ccccn3)c(N)c(C)c1O	13826963	Ki						=	220	nM		6.65758		A			BAO_0000192	UO_0000065	http://www.openphacts.org/units/Nanomolar	1277434	CHEMBL3089624	B	Displacement of fluorescein-labeled MS574 from recombinant human BRD3 BrD2 after 1 hr by fluorescence anisotropy assay	1	Scientific Literature	Homo sapiens		9606	Autocuration	BAO_0000357	104266	CHEMBL1795186	SINGLE PROTEIN	Q15059	Bromodomain-containing protein 3	Homo sapiens	9	Protein			76008	CHEMBL3085768	24144283	J. Med. Chem.	2013	56	22	9251
A471	Cc1cc(N=Nc2ccc(cc2)S(=O)(=O)Nc3ccccn3)c(N)c(Cl)c1O	13826962	Ki						=	320	nM		6.49485		A			BAO_0000192	UO_0000065	http://www.openphacts.org/units/Nanomolar	1277434	CHEMBL3089624	B	Displacement of fluorescein-labeled MS574 from recombinant human BRD3 BrD2 after 1 hr by fluorescence anisotropy assay	1	Scientific Literature	Homo sapiens		9606	Autocuration	BAO_0000357	104266	CHEMBL1795186	SINGLE PROTEIN	Q15059	Bromodomain-containing protein 3	Homo sapiens	9	Protein			76008	CHEMBL3085768	24144283	J. Med. Chem.	2013	56	22	9251
A388	Cc1cc(cc(C)c1O)N=Nc2ccc(cc2)S(=O)(=O)Nc3ccccn3	13826158	Ki						=	2480	nM		5.60555		A			BAO_0000192	UO_0000065	http://www.openphacts.org/units/Nanomolar	1277434	CHEMBL3089624	B	Displacement of fluorescein-labeled MS574 from recombinant human BRD3 BrD2 after 1 hr by fluorescence anisotropy assay	1	Scientific Literature	Homo sapiens		9606	Autocuration	BAO_0000357	104266	CHEMBL1795186	SINGLE PROTEIN	Q15059	Bromodomain-containing protein 3	Homo sapiens	9	Protein			76008	CHEMBL3085768	24144283	J. Med. Chem.	2013	56	22	9251
679	C[S+](C)[O-]	13972328	IC50						=	280000000	nM		0.55		N	Outside typical range		BAO_0000190	UO_0000065	http://www.openphacts.org/units/Nanomolar	1298741	CHEMBL3136026	B	Inhibition of BRD4(1) (unknown origin) by Alpha screen binding assay	1	Scientific Literature	Homo sapiens		9606	Autocuration	BAO_0000357	103454	CHEMBL1163125	SINGLE PROTEIN	O60885	Bromodomain-containing protein 4	Homo sapiens	9	Protein			77333	CHEMBL3132839		MedChemComm	2014	5	3	288
2118	Cc1nnc2CN=C(c3ccccc3)c4cc(Cl)ccc4n12	8055999	Kd						=	2460	nM		5.61		A			BAO_0000034	UO_0000065	http://www.openphacts.org/units/Nanomolar	806301	CHEMBL1959065	B	Binding affinity to BRD4-BD1 by isothermal titration calorimetry	1	Scientific Literature				Autocuration	BAO_0000357	103454	CHEMBL1163125	SINGLE PROTEIN	O60885	Bromodomain-containing protein 4	Homo sapiens	8	Homologous protein			61235	CHEMBL1955750	22137933	Bioorg. Med. Chem.	2012	20	6	1878
3016	CN1C(=O)CN=C(c2ccccc2)c3cc(Cl)ccc13	14661070	Inhibition						=	43	%		4.17862	50	N			BAO_0000201	UO_0000187	http://qudt.org/vocab/unit#Percent	1349751	CHEMBL3267583	B	Displacement of histone peptide from His-tagged BRD4(1) (unknown origin) expressed in Escherichia coli BL21(DE3) at 50 uM by alpha-screen assay	1	Scientific Literature	Homo sapiens		9606	Autocuration	BAO_0000019	103454	CHEMBL1163125	SINGLE PROTEIN	O60885	Bromodomain-containing protein 4	Homo sapiens	9	Protein			83201	CHEMBL3259646	24767840	Bioorg. Med. Chem. Lett.	2014	24	11	2493
5311	ONC(=O)CCCCCCC(=O)Nc1ccccc1	14529913	IC50						>	50000	nM		4.3		N			BAO_0000190	UO_0000065	http://www.openphacts.org/units/Nanomolar	1329054	CHEMBL3224040	B	Inhibition of recombinant BRD4 bromodomain 1 (unknown origin) using histone H4 peptide as substrate incubated for 1 hr under dark condition by HTRF assay	1	Scientific Literature	Homo sapiens		9606	Autocuration	BAO_0000357	103454	CHEMBL1163125	SINGLE PROTEIN	O60885	Bromodomain-containing protein 4	Homo sapiens	9	Protein			82037	CHEMBL3217474		MedChemComm	2014	5	3	342
13387	CN1CCCC1=O	13972330	IC50						=	6000000	nM		2.22		N	Outside typical range		BAO_0000190	UO_0000065	http://www.openphacts.org/units/Nanomolar	1298741	CHEMBL3136026	B	Inhibition of BRD4(1) (unknown origin) by Alpha screen binding assay	1	Scientific Literature	Homo sapiens		9606	Autocuration	BAO_0000357	103454	CHEMBL1163125	SINGLE PROTEIN	O60885	Bromodomain-containing protein 4	Homo sapiens	9	Protein			77333	CHEMBL3132839		MedChemComm	2014	5	3	288
704120	CC(=O)c1ccc(OCc2c(C)onc2C)cc1	14661045	Inhibition						=	35	%		4.03218	50	N			BAO_0000201	UO_0000187	http://qudt.org/vocab/unit#Percent	1349751	CHEMBL3267583	B	Displacement of histone peptide from His-tagged BRD4(1) (unknown origin) expressed in Escherichia coli BL21(DE3) at 50 uM by alpha-screen assay	1	Scientific Literature	Homo sapiens		9606	Autocuration	BAO_0000019	103454	CHEMBL1163125	SINGLE PROTEIN	O60885	Bromodomain-containing protein 4	Homo sapiens	9	Protein			83201	CHEMBL3259646	24767840	Bioorg. Med. Chem. Lett.	2014	24	11	2493
1382046	Cc1noc(N)c1c2ccccc2	13457090	IC50						=	33000	nM		4.48		N			BAO_0000190	UO_0000065	http://www.openphacts.org/units/Nanomolar	986181	CHEMBL2433086	B	Inhibition of His-FLAG-tagged BRD4 binding domain1 (unknown origin) binding to H4-TetraAc-biotin peptide after 20 mins by AlphaLISA	1	Scientific Literature	Homo sapiens		9606	Autocuration	BAO_0000357	103454	CHEMBL1163125	SINGLE PROTEIN	O60885	Bromodomain-containing protein 4	Homo sapiens	9	Protein			74979	CHEMBL2429789		ACS Med. Chem. Lett.	2013	4	9	835
1511198	CNS(=O)(=O)c1cc(ccc1C)c2nn3c(C)nnc3c4ccccc24	13891644	IC50						=	1995.26	nM		5.7		A			BAO_0000190	UO_0000065	http://www.openphacts.org/units/Nanomolar	1287025	CHEMBL3111336	B	Displacement of H4Ac4 peptide from BRD4 bromodomain-1 (unknown origin) by AlphaScreen assay	1	Scientific Literature	Homo sapiens		9606	Autocuration	BAO_0000357	103454	CHEMBL1163125	SINGLE PROTEIN	O60885	Bromodomain-containing protein 4	Homo sapiens	9	Protein			76683	CHEMBL3108763	24313754	J. Med. Chem.	2014	57	2	462
1511199	CN(C)S(=O)(=O)c1cc(ccc1C)c2nn3c(C)nnc3c4ccccc24	13891641	IC50						=	1258.93	nM		5.9		A			BAO_0000190	UO_0000065	http://www.openphacts.org/units/Nanomolar	1287025	CHEMBL3111336	B	Displacement of H4Ac4 peptide from BRD4 bromodomain-1 (unknown origin) by AlphaScreen assay	1	Scientific Literature	Homo sapiens		9606	Autocuration	BAO_0000357	103454	CHEMBL1163125	SINGLE PROTEIN	O60885	Bromodomain-containing protein 4	Homo sapiens	9	Protein			76683	CHEMBL3108763	24313754	J. Med. Chem.	2014	57	2	462
2782959	Cc1noc(N)c1c2cccc(c2)C(F)(F)F	13477947	IC50						=	80900	nM		4.09		N			BAO_0000190	UO_0000065	http://www.openphacts.org/units/Nanomolar	988295	CHEMBL2439861	B	Inhibition of His-tagged first bromodomain of BRD4 (unknown origin) using H-SGRGK(Ac)GGK(Ac)GLGK-(Ac)GGAK(Ac)RHRK(Biotin)-OH as substrate preincubated for 30 mins prior to substrate addition measured after 30 mins by AlphaScreen assay	1	Scientific Literature	Homo sapiens		9606	Autocuration	BAO_0000357	103454	CHEMBL1163125	SINGLE PROTEIN	O60885	Bromodomain-containing protein 4	Homo sapiens	9	Protein			75196	CHEMBL2434916	24090311	J. Med. Chem.	2013	56	20	8073
2927305	CN1Cc2cc(Br)ccc2NC1=O	12134096	IC50						=	23000	nM		4.64		N			BAO_0000190	UO_0000065	http://www.openphacts.org/units/Nanomolar	878136	CHEMBL2183681	B	Inhibition of BRD4 isoform 1 by AlphaScreen assay	1	Scientific Literature				Autocuration	BAO_0000357	103454	CHEMBL1163125	SINGLE PROTEIN	O60885	Bromodomain-containing protein 4	Homo sapiens	8	Homologous protein			66670	CHEMBL2177039	23095041	J. Med. Chem.	2012	55	22	9831
4907545	Cc1ccc(cc1NS(=O)(=O)C)c2nn3c(C)nnc3c4ccccc24	13891653	IC50						=	5011.87	nM		5.3		A			BAO_0000190	UO_0000065	http://www.openphacts.org/units/Nanomolar	1287025	CHEMBL3111336	B	Displacement of H4Ac4 peptide from BRD4 bromodomain-1 (unknown origin) by AlphaScreen assay	1	Scientific Literature	Homo sapiens		9606	Autocuration	BAO_0000357	103454	CHEMBL1163125	SINGLE PROTEIN	O60885	Bromodomain-containing protein 4	Homo sapiens	9	Protein			76683	CHEMBL3108763	24313754	J. Med. Chem.	2014	57	2	462
4908238	CCC(=O)Nc1cc(ccc1C)c2nn3c(C)nnc3c4ccccc24	13891947	IC50						=	19952.6	nM		4.7		N			BAO_0000190	UO_0000065	http://www.openphacts.org/units/Nanomolar	1287025	CHEMBL3111336	B	Displacement of H4Ac4 peptide from BRD4 bromodomain-1 (unknown origin) by AlphaScreen assay	1	Scientific Literature	Homo sapiens		9606	Autocuration	BAO_0000357	103454	CHEMBL1163125	SINGLE PROTEIN	O60885	Bromodomain-containing protein 4	Homo sapiens	9	Protein			76683	CHEMBL3108763	24313754	J. Med. Chem.	2014	57	2	462
9328193	CN(Cc1ccc(C)cc1)c2cc(C)nc3ncnn23	13477946	Inhibition						=	33	%		3.59553	125	N			BAO_0000201	UO_0000187	http://qudt.org/vocab/unit#Percent	988294	CHEMBL2439748	B	Inhibition of His-tagged first bromodomain of BRD4 (unknown origin) using H-SGRGK(Ac)GGK(Ac)GLGK-(Ac)GGAK(Ac)RHRK(Biotin)-OH as substrate at 125 uM preincubated for 30 mins prior to substrate addition measured after 30 mins by AlphaScreen assay relative to control	1	Scientific Literature	Homo sapiens		9606	Autocuration	BAO_0000357	103454	CHEMBL1163125	SINGLE PROTEIN	O60885	Bromodomain-containing protein 4	Homo sapiens	9	Protein			75196	CHEMBL2434916	24090311	J. Med. Chem.	2013	56	20	8073
13785514	C1=CC=NC(=C1)NS(=O)(=O)C2=CC=C(C=C2)NN=C3C=C(C(=O)C(=C3)Br)Br		Ki									0.52	6.284		A						1054713			Displacement of fluorescein-labeled MS574 from recombinant human BRD4 BrD1 after 1 hr by fluorescence anisotropy assay												Bromodomain-containing protein 4
14774292	Nc1ccc(cc1)C2=CSC(=O)N2	12733096	IC50						=	51000	nM		4.29		N			BAO_0000190	UO_0000065	http://www.openphacts.org/units/Nanomolar	953486	CHEMBL2351097	B	Displacement of FITC-labeled (+)-JQ1 from bromodomain BRD4(1) (unknown origin) expressed in Escherichia coli BL21(DE3) after 4 hrs by fluorescence anisotropy assay	1	Scientific Literature	Homo sapiens		9606	Autocuration	BAO_0000019	103454	CHEMBL1163125	SINGLE PROTEIN	O60885	Bromodomain-containing protein 4	Homo sapiens	9	Protein			72867	CHEMBL2346589	23530754	J. Med. Chem.	2013	56	10	3833
17481591	CN(Cc1ccc(Cl)s1)c2cc(C)nc3ncnn23	13477938	IC50						=	24000	nM		4.62		N			BAO_0000190	UO_0000065	http://www.openphacts.org/units/Nanomolar	988295	CHEMBL2439861	B	Inhibition of His-tagged first bromodomain of BRD4 (unknown origin) using H-SGRGK(Ac)GGK(Ac)GLGK-(Ac)GGAK(Ac)RHRK(Biotin)-OH as substrate preincubated for 30 mins prior to substrate addition measured after 30 mins by AlphaScreen assay	1	Scientific Literature	Homo sapiens		9606	Autocuration	BAO_0000357	103454	CHEMBL1163125	SINGLE PROTEIN	O60885	Bromodomain-containing protein 4	Homo sapiens	9	Protein			75196	CHEMBL2434916	24090311	J. Med. Chem.	2013	56	20	8073
20350618	CN1N=C(c2ccccc2)c3cc(Cl)ccc3n4c(C)nnc14	8056000	Kd						=	640	nM		6.19		A			BAO_0000034	UO_0000065	http://www.openphacts.org/units/Nanomolar	806301	CHEMBL1959065	B	Binding affinity to BRD4-BD1 by isothermal titration calorimetry	1	Scientific Literature				Autocuration	BAO_0000357	103454	CHEMBL1163125	SINGLE PROTEIN	O60885	Bromodomain-containing protein 4	Homo sapiens	8	Homologous protein			61235	CHEMBL1955750	22137933	Bioorg. Med. Chem.	2012	20	6	1878
39129690	Nc1cccc(c1)C2=CSC(=O)N2	12733097	IC50						=	42000	nM		4.38		N			BAO_0000190	UO_0000065	http://www.openphacts.org/units/Nanomolar	953486	CHEMBL2351097	B	Displacement of FITC-labeled (+)-JQ1 from bromodomain BRD4(1) (unknown origin) expressed in Escherichia coli BL21(DE3) after 4 hrs by fluorescence anisotropy assay	1	Scientific Literature	Homo sapiens		9606	Autocuration	BAO_0000019	103454	CHEMBL1163125	SINGLE PROTEIN	O60885	Bromodomain-containing protein 4	Homo sapiens	9	Protein			72867	CHEMBL2346589	23530754	J. Med. Chem.	2013	56	10	3833
39791103	CN1Cc2cc(ccc2NC1=O)c3c(C)onc3C	6364731	IC50						=	4800	nM		5.32		A			BAO_0000190	UO_0000065	http://www.openphacts.org/units/Nanomolar	770206	CHEMBL1832996	B	Displacement of H4Ac4 peptide from first bromodomain of human BRD4 by peptide displacement assay	1	Scientific Literature	Homo sapiens		9606	Autocuration	BAO_0000357	103454	CHEMBL1163125	SINGLE PROTEIN	O60885	Bromodomain-containing protein 4	Homo sapiens	9	Protein			58989	CHEMBL1828554	21851057	J. Med. Chem.	2011	54	19	6761
39796783	CC(=O)Nc1cccc(c1)c2cc(C)nc3ccccc23	13477944	Inhibition						=	31	%		3.25457	250	N			BAO_0000201	UO_0000187	http://qudt.org/vocab/unit#Percent	988293	CHEMBL2439747	B	Inhibition of His-tagged first bromodomain of BRD4 (unknown origin) using H-SGRGK(Ac)GGK(Ac)GLGK-(Ac)GGAK(Ac)RHRK(Biotin)-OH as substrate at 250 uM preincubated for 30 mins prior to substrate addition measured after 30 mins by AlphaScreen assay relative to control	1	Scientific Literature	Homo sapiens		9606	Autocuration	BAO_0000357	103454	CHEMBL1163125	SINGLE PROTEIN	O60885	Bromodomain-containing protein 4	Homo sapiens	9	Protein			75196	CHEMBL2434916	24090311	J. Med. Chem.	2013	56	20	8073
43286729	Clc1cccc(c1)C2=CSC(=O)N2	12733098	IC50						=	24000	nM		4.62		N			BAO_0000190	UO_0000065	http://www.openphacts.org/units/Nanomolar	953486	CHEMBL2351097	B	Displacement of FITC-labeled (+)-JQ1 from bromodomain BRD4(1) (unknown origin) expressed in Escherichia coli BL21(DE3) after 4 hrs by fluorescence anisotropy assay	1	Scientific Literature	Homo sapiens		9606	Autocuration	BAO_0000019	103454	CHEMBL1163125	SINGLE PROTEIN	O60885	Bromodomain-containing protein 4	Homo sapiens	9	Protein			72867	CHEMBL2346589	23530754	J. Med. Chem.	2013	56	10	3833
44243549	CC(=O)c1cccc(c1)c2c(C)onc2C	6364733	IC50						=	24600	nM		4.61		N			BAO_0000190	UO_0000065	http://www.openphacts.org/units/Nanomolar	770206	CHEMBL1832996	B	Displacement of H4Ac4 peptide from first bromodomain of human BRD4 by peptide displacement assay	1	Scientific Literature	Homo sapiens		9606	Autocuration	BAO_0000357	103454	CHEMBL1163125	SINGLE PROTEIN	O60885	Bromodomain-containing protein 4	Homo sapiens	9	Protein			58989	CHEMBL1828554	21851057	J. Med. Chem.	2011	54	19	6761
46943432	CCNC(=O)C[C@@H]1N=C(c2ccc(Cl)cc2)c3cc(OC)ccc3n4c(C)nnc14	8046403	IC50						=	36.1	nM		7.44		A		1	BAO_0000190	UO_0000065	http://www.openphacts.org/units/Nanomolar	807451	CHEMBL1958573	B	Displacement of acetylated histone peptide from BRD4-BD1,2 by FRET assay	1	Scientific Literature				Autocuration	BAO_0000357	103454	CHEMBL1163125	SINGLE PROTEIN	O60885	Bromodomain-containing protein 4	Homo sapiens	8	Homologous protein			61257	CHEMBL1955852	22316554	Bioorg. Med. Chem.	2012	20	6	1887
49815111	Cn1cc(c2ccc(F)cc2)c3N=CNC(=O)c13	13477932	IC50						=	16000	nM		4.8		N			BAO_0000190	UO_0000065	http://www.openphacts.org/units/Nanomolar	988295	CHEMBL2439861	B	Inhibition of His-tagged first bromodomain of BRD4 (unknown origin) using H-SGRGK(Ac)GGK(Ac)GLGK-(Ac)GGAK(Ac)RHRK(Biotin)-OH as substrate preincubated for 30 mins prior to substrate addition measured after 30 mins by AlphaScreen assay	1	Scientific Literature	Homo sapiens		9606	Autocuration	BAO_0000357	103454	CHEMBL1163125	SINGLE PROTEIN	O60885	Bromodomain-containing protein 4	Homo sapiens	9	Protein			75196	CHEMBL2434916	24090311	J. Med. Chem.	2013	56	20	8073
49815116	Cc1ccc(cc1)c2cn(C)c3C(=O)NC=Nc23	13477933	IC50						=	31000	nM		4.51		N			BAO_0000190	UO_0000065	http://www.openphacts.org/units/Nanomolar	988295	CHEMBL2439861	B	Inhibition of His-tagged first bromodomain of BRD4 (unknown origin) using H-SGRGK(Ac)GGK(Ac)GLGK-(Ac)GGAK(Ac)RHRK(Biotin)-OH as substrate preincubated for 30 mins prior to substrate addition measured after 30 mins by AlphaScreen assay	1	Scientific Literature	Homo sapiens		9606	Autocuration	BAO_0000357	103454	CHEMBL1163125	SINGLE PROTEIN	O60885	Bromodomain-containing protein 4	Homo sapiens	9	Protein			75196	CHEMBL2434916	24090311	J. Med. Chem.	2013	56	20	8073
49837845	CC1=CC(=C(C=C1N/N=C/2\C=C(C(=O)C=C2N)C)S(=O)(=O)O)C		Ki									10.85	4.96457	4.96457	N						1054713			Displacement of fluorescein-labeled MS574 from recombinant human BRD4 BrD1 after 1 hr by fluorescence anisotropy assay												Bromodomain-containing protein 4
52908295	Cn1ccc2C=CNC(=O)c12	13477943	Inhibition						=	11	%		3.092	100	N			BAO_0000201	UO_0000187	http://qudt.org/vocab/unit#Percent	988292	CHEMBL2439746	B	Inhibition of His-tagged first bromodomain of BRD4 (unknown origin) using H-SGRGK(Ac)GGK(Ac)GLGK-(Ac)GGAK(Ac)RHRK(Biotin)-OH as substrate at 100 uM preincubated for 30 mins prior to substrate addition measured after 30 mins by AlphaScreen assay relative to control	1	Scientific Literature	Homo sapiens		9606	Autocuration	BAO_0000357	103454	CHEMBL1163125	SINGLE PROTEIN	O60885	Bromodomain-containing protein 4	Homo sapiens	9	Protein			75196	CHEMBL2434916	24090311	J. Med. Chem.	2013	56	20	8073
52912189	COc1cc2c3N([C@H](C)c4ccccn4)C(=O)Nc3cnc2cc1c5c(C)onc5C	13457079	IC50						=	18	nM		7.74		A			BAO_0000190	UO_0000065	http://www.openphacts.org/units/Nanomolar	986181	CHEMBL2433086	B	Inhibition of His-FLAG-tagged BRD4 binding domain1 (unknown origin) binding to H4-TetraAc-biotin peptide after 20 mins by AlphaLISA	1	Scientific Literature	Homo sapiens		9606	Autocuration	BAO_0000357	103454	CHEMBL1163125	SINGLE PROTEIN	O60885	Bromodomain-containing protein 4	Homo sapiens	9	Protein			74979	CHEMBL2429789		ACS Med. Chem. Lett.	2013	4	9	835
52912223	CNCc1ccc(cc1)c2ccc3N([C@@H](C)C[C@@H](NC(=O)OC(C)C)c3c2)C(=O)C	14529912	IC50						=	280	nM		6.55		A			BAO_0000190	UO_0000065	http://www.openphacts.org/units/Nanomolar	1329054	CHEMBL3224040	B	Inhibition of recombinant BRD4 bromodomain 1 (unknown origin) using histone H4 peptide as substrate incubated for 1 hr under dark condition by HTRF assay	1	Scientific Literature	Homo sapiens		9606	Autocuration	BAO_0000357	103454	CHEMBL1163125	SINGLE PROTEIN	O60885	Bromodomain-containing protein 4	Homo sapiens	9	Protein			82037	CHEMBL3217474		MedChemComm	2014	5	3	342
53308655	CCOc1cc(cc(c1)c2c(C)onc2C)C(=O)O	6364737	IC50						=	51200	nM		4.29		N			BAO_0000190	UO_0000065	http://www.openphacts.org/units/Nanomolar	770206	CHEMBL1832996	B	Displacement of H4Ac4 peptide from first bromodomain of human BRD4 by peptide displacement assay	1	Scientific Literature	Homo sapiens		9606	Autocuration	BAO_0000357	103454	CHEMBL1163125	SINGLE PROTEIN	O60885	Bromodomain-containing protein 4	Homo sapiens	9	Protein			58989	CHEMBL1828554	21851057	J. Med. Chem.	2011	54	19	6761
53318989	Cc1nnc2[C@H](NC(=O)OCc3ccccc3)N=C(c4ccccc4)c5ccccc5n12	8046397	IC50						=	15.5	nM		7.81		A			BAO_0000190	UO_0000065	http://www.openphacts.org/units/Nanomolar	807451	CHEMBL1958573	B	Displacement of acetylated histone peptide from BRD4-BD1,2 by FRET assay	1	Scientific Literature				Autocuration	BAO_0000357	103454	CHEMBL1163125	SINGLE PROTEIN	O60885	Bromodomain-containing protein 4	Homo sapiens	8	Homologous protein			61257	CHEMBL1955852	22316554	Bioorg. Med. Chem.	2012	20	6	1887
54757749	CCOc1cccc(c1)c2c(C)onc2C	6364734	IC50						=	23200	nM		4.63		N			BAO_0000190	UO_0000065	http://www.openphacts.org/units/Nanomolar	770206	CHEMBL1832996	B	Displacement of H4Ac4 peptide from first bromodomain of human BRD4 by peptide displacement assay	1	Scientific Literature	Homo sapiens		9606	Autocuration	BAO_0000357	103454	CHEMBL1163125	SINGLE PROTEIN	O60885	Bromodomain-containing protein 4	Homo sapiens	9	Protein			58989	CHEMBL1828554	21851057	J. Med. Chem.	2011	54	19	6761
54757750	CC(O)c1cccc(c1)c2c(C)onc2C	6364735	IC50						=	9700	nM		5.01		A			BAO_0000190	UO_0000065	http://www.openphacts.org/units/Nanomolar	770206	CHEMBL1832996	B	Displacement of H4Ac4 peptide from first bromodomain of human BRD4 by peptide displacement assay	1	Scientific Literature	Homo sapiens		9606	Autocuration	BAO_0000357	103454	CHEMBL1163125	SINGLE PROTEIN	O60885	Bromodomain-containing protein 4	Homo sapiens	9	Protein			58989	CHEMBL1828554	21851057	J. Med. Chem.	2011	54	19	6761
54757751	CCOC(=O)c1cc(OCC)cc(c1)c2c(C)onc2C	6364736	IC50						=	7700	nM		5.11		A			BAO_0000190	UO_0000065	http://www.openphacts.org/units/Nanomolar	770206	CHEMBL1832996	B	Displacement of H4Ac4 peptide from first bromodomain of human BRD4 by peptide displacement assay	1	Scientific Literature	Homo sapiens		9606	Autocuration	BAO_0000357	103454	CHEMBL1163125	SINGLE PROTEIN	O60885	Bromodomain-containing protein 4	Homo sapiens	9	Protein			58989	CHEMBL1828554	21851057	J. Med. Chem.	2011	54	19	6761
54757752	CCOc1cc(cc(c1)c2c(C)onc2C)C(=O)C	6364738	IC50						=	7500	nM		5.12		A			BAO_0000190	UO_0000065	http://www.openphacts.org/units/Nanomolar	770206	CHEMBL1832996	B	Displacement of H4Ac4 peptide from first bromodomain of human BRD4 by peptide displacement assay	1	Scientific Literature	Homo sapiens		9606	Autocuration	BAO_0000357	103454	CHEMBL1163125	SINGLE PROTEIN	O60885	Bromodomain-containing protein 4	Homo sapiens	9	Protein			58989	CHEMBL1828554	21851057	J. Med. Chem.	2011	54	19	6761
57344430	Cc1noc2[C@H](CC(=O)N)N=C(C3CCOCC3)c4c(C)c(C)sc4c12	13457066	IC50						=	6200	nM		5.21		A			BAO_0000190	UO_0000065	http://www.openphacts.org/units/Nanomolar	986181	CHEMBL2433086	B	Inhibition of His-FLAG-tagged BRD4 binding domain1 (unknown origin) binding to H4-TetraAc-biotin peptide after 20 mins by AlphaLISA	1	Scientific Literature	Homo sapiens		9606	Autocuration	BAO_0000357	103454	CHEMBL1163125	SINGLE PROTEIN	O60885	Bromodomain-containing protein 4	Homo sapiens	9	Protein			74979	CHEMBL2429789		ACS Med. Chem. Lett.	2013	4	9	835
57344431	CCNC(=O)C[C@@H]1N=C(c2ccc(Cl)cc2)c3c(C)c(C)sc3c4c(C)noc14	13457087	IC50						=	36	nM		7.44		A			BAO_0000190	UO_0000065	http://www.openphacts.org/units/Nanomolar	986181	CHEMBL2433086	B	Inhibition of His-FLAG-tagged BRD4 binding domain1 (unknown origin) binding to H4-TetraAc-biotin peptide after 20 mins by AlphaLISA	1	Scientific Literature	Homo sapiens		9606	Autocuration	BAO_0000357	103454	CHEMBL1163125	SINGLE PROTEIN	O60885	Bromodomain-containing protein 4	Homo sapiens	9	Protein			74979	CHEMBL2429789		ACS Med. Chem. Lett.	2013	4	9	835
57344432	Cc1noc2[C@H](CC(=O)N)N=C(N3CCOCC3)c4c(C)c(C)sc4c12	13457067	IC50						=	1100	nM		5.96		A			BAO_0000190	UO_0000065	http://www.openphacts.org/units/Nanomolar	986181	CHEMBL2433086	B	Inhibition of His-FLAG-tagged BRD4 binding domain1 (unknown origin) binding to H4-TetraAc-biotin peptide after 20 mins by AlphaLISA	1	Scientific Literature	Homo sapiens		9606	Autocuration	BAO_0000357	103454	CHEMBL1163125	SINGLE PROTEIN	O60885	Bromodomain-containing protein 4	Homo sapiens	9	Protein			74979	CHEMBL2429789		ACS Med. Chem. Lett.	2013	4	9	835
57344527	CC(=O)NC[C@@H]1N=C(c2ccc(Cl)cc2)c3c(C)c(C)sc3c4c(C)noc14	13457084	IC50						=	190	nM		6.72		A			BAO_0000190	UO_0000065	http://www.openphacts.org/units/Nanomolar	986181	CHEMBL2433086	B	Inhibition of His-FLAG-tagged BRD4 binding domain1 (unknown origin) binding to H4-TetraAc-biotin peptide after 20 mins by AlphaLISA	1	Scientific Literature	Homo sapiens		9606	Autocuration	BAO_0000357	103454	CHEMBL1163125	SINGLE PROTEIN	O60885	Bromodomain-containing protein 4	Homo sapiens	9	Protein			74979	CHEMBL2429789		ACS Med. Chem. Lett.	2013	4	9	835
57344528	COC(=O)NC[C@@H]1N=C(c2ccc(Cl)cc2)c3c(C)c(C)sc3c4c(C)noc14	13457085	IC50						=	86	nM		7.07		A			BAO_0000190	UO_0000065	http://www.openphacts.org/units/Nanomolar	986181	CHEMBL2433086	B	Inhibition of His-FLAG-tagged BRD4 binding domain1 (unknown origin) binding to H4-TetraAc-biotin peptide after 20 mins by AlphaLISA	1	Scientific Literature	Homo sapiens		9606	Autocuration	BAO_0000357	103454	CHEMBL1163125	SINGLE PROTEIN	O60885	Bromodomain-containing protein 4	Homo sapiens	9	Protein			74979	CHEMBL2429789		ACS Med. Chem. Lett.	2013	4	9	835
57344531	Cc1noc2[C@H](Cc3ncc[nH]3)N=C(c4ccc(Cl)cc4)c5c(C)c(C)sc5c12	13457083	IC50						=	200	nM		6.7		A			BAO_0000190	UO_0000065	http://www.openphacts.org/units/Nanomolar	986181	CHEMBL2433086	B	Inhibition of His-FLAG-tagged BRD4 binding domain1 (unknown origin) binding to H4-TetraAc-biotin peptide after 20 mins by AlphaLISA	1	Scientific Literature	Homo sapiens		9606	Autocuration	BAO_0000357	103454	CHEMBL1163125	SINGLE PROTEIN	O60885	Bromodomain-containing protein 4	Homo sapiens	9	Protein			74979	CHEMBL2429789		ACS Med. Chem. Lett.	2013	4	9	835
57344606	Cc1noc2[C@H](Cc3nccs3)N=C(c4ccc(Cl)cc4)c5c(C)c(C)sc5c12	13457082	IC50						=	190	nM		6.72		A			BAO_0000190	UO_0000065	http://www.openphacts.org/units/Nanomolar	986181	CHEMBL2433086	B	Inhibition of His-FLAG-tagged BRD4 binding domain1 (unknown origin) binding to H4-TetraAc-biotin peptide after 20 mins by AlphaLISA	1	Scientific Literature	Homo sapiens		9606	Autocuration	BAO_0000357	103454	CHEMBL1163125	SINGLE PROTEIN	O60885	Bromodomain-containing protein 4	Homo sapiens	9	Protein			74979	CHEMBL2429789		ACS Med. Chem. Lett.	2013	4	9	835
57345400	Cc1noc2[C@H](CC(=O)N)N=C(c3ccc(Cl)cc3)c4c(C)c(C)sc4c12	13457088	IC50						=	26	nM		7.59		A			BAO_0000190	UO_0000065	http://www.openphacts.org/units/Nanomolar	986181	CHEMBL2433086	B	Inhibition of His-FLAG-tagged BRD4 binding domain1 (unknown origin) binding to H4-TetraAc-biotin peptide after 20 mins by AlphaLISA	1	Scientific Literature	Homo sapiens		9606	Autocuration	BAO_0000357	103454	CHEMBL1163125	SINGLE PROTEIN	O60885	Bromodomain-containing protein 4	Homo sapiens	9	Protein			74979	CHEMBL2429789		ACS Med. Chem. Lett.	2013	4	9	835
57388845	Cc1noc2[C@H](CC(=O)N)N=C(Cc3ccccc3)c4c(C)c(C)sc4c12	13457069	IC50						=	5700	nM		5.24		A			BAO_0000190	UO_0000065	http://www.openphacts.org/units/Nanomolar	986181	CHEMBL2433086	B	Inhibition of His-FLAG-tagged BRD4 binding domain1 (unknown origin) binding to H4-TetraAc-biotin peptide after 20 mins by AlphaLISA	1	Scientific Literature	Homo sapiens		9606	Autocuration	BAO_0000357	103454	CHEMBL1163125	SINGLE PROTEIN	O60885	Bromodomain-containing protein 4	Homo sapiens	9	Protein			74979	CHEMBL2429789		ACS Med. Chem. Lett.	2013	4	9	835
60171223	CC1=CC(=NNC2=CC=C(C=C2)S(=O)(=O)NC3=CC=C(C=C3)OC)C=C(C1=O)C		Ki									6.48	5.18842		A						1054713			Displacement of fluorescein-labeled MS574 from recombinant human BRD4 BrD1 after 1 hr by fluorescence anisotropy assay												Bromodomain-containing protein 4
60171339	CC(C)C1=CC(=NNC2=CC=C(C=C2)S(=O)(=O)NC3=CC=CC=N3)C=C(C1=O)C(C)C		Ki												N						1054713			Displacement of fluorescein-labeled MS574 from recombinant human BRD4 BrD1 after 1 hr by fluorescence anisotropy assay												Bromodomain-containing protein 4
60171341	C1=CC=NC(=C1)NS(=O)(=O)C2=CC=C(C=C2)NN=C3C=C(C(=O)C(=C3)Cl)Cl		Ki									1.27	5.8962		A						1054713			Displacement of fluorescein-labeled MS574 from recombinant human BRD4 BrD1 after 1 hr by fluorescence anisotropy assay												Bromodomain-containing protein 4
60171456	CC1=CC(=NNC2=CC=C(C=C2)S(=O)(=O)NC3=NC=C(C=C3)OC)C=C(C1=O)C		Ki									0.5	6.30103		A						1054713			Displacement of fluorescein-labeled MS574 from recombinant human BRD4 BrD1 after 1 hr by fluorescence anisotropy assay												Bromodomain-containing protein 4
60171583	CC1=CC(=NNC2=CC=C(C=C2)S(=O)(=O)NC3=CC=C(C=C3)C(F)(F)F)C=C(C1=O)C		Ki									10.7	4.97062	4.97062	N						1054713			Displacement of fluorescein-labeled MS574 from recombinant human BRD4 BrD1 after 1 hr by fluorescence anisotropy assay												Bromodomain-containing protein 4
60171584	CC1=CC(=NNC2=CC=C(C=C2)S(=O)(=O)NC3=CC=CC=N3)C=C(C1=O)C		Ki									0.91	6.04096		A						1054713			Displacement of fluorescein-labeled MS574 from recombinant human BRD4 BrD1 after 1 hr by fluorescence anisotropy assay												Bromodomain-containing protein 4
66553124	CCNS(=O)(=O)c1ccc2NC(=O)N(C)Cc2c1	12134094	IC50						=	1900	nM		5.72		A			BAO_0000190	UO_0000065	http://www.openphacts.org/units/Nanomolar	878136	CHEMBL2183681	B	Inhibition of BRD4 isoform 1 by AlphaScreen assay	1	Scientific Literature				Autocuration	BAO_0000357	103454	CHEMBL1163125	SINGLE PROTEIN	O60885	Bromodomain-containing protein 4	Homo sapiens	8	Homologous protein			66670	CHEMBL2177039	23095041	J. Med. Chem.	2012	55	22	9831
66553125	CN1Cc2cc(ccc2NC1=O)S(=O)(=O)N3CCCC3	12134095	IC50						=	4800	nM		5.32		A			BAO_0000190	UO_0000065	http://www.openphacts.org/units/Nanomolar	878136	CHEMBL2183681	B	Inhibition of BRD4 isoform 1 by AlphaScreen assay	1	Scientific Literature				Autocuration	BAO_0000357	103454	CHEMBL1163125	SINGLE PROTEIN	O60885	Bromodomain-containing protein 4	Homo sapiens	8	Homologous protein			66670	CHEMBL2177039	23095041	J. Med. Chem.	2012	55	22	9831
67814495	C[C@H]([C@@H]1N=C(c2ccc(cc2)C#N)c3c(C)c(C)sc3c4c(C)noc14)C(=O)N	13457081	IC50						=	250	nM		6.6		A			BAO_0000190	UO_0000065	http://www.openphacts.org/units/Nanomolar	986181	CHEMBL2433086	B	Inhibition of His-FLAG-tagged BRD4 binding domain1 (unknown origin) binding to H4-TetraAc-biotin peptide after 20 mins by AlphaLISA	1	Scientific Literature	Homo sapiens		9606	Autocuration	BAO_0000357	103454	CHEMBL1163125	SINGLE PROTEIN	O60885	Bromodomain-containing protein 4	Homo sapiens	9	Protein			74979	CHEMBL2429789		ACS Med. Chem. Lett.	2013	4	9	835
71271375	CN1Cc2cc(NS(=O)(=O)c3ccc(C)cc3)ccc2NC1=O	12134088	IC50						=	390	nM		6.41		A			BAO_0000190	UO_0000065	http://www.openphacts.org/units/Nanomolar	878136	CHEMBL2183681	B	Inhibition of BRD4 isoform 1 by AlphaScreen assay	1	Scientific Literature				Autocuration	BAO_0000357	103454	CHEMBL1163125	SINGLE PROTEIN	O60885	Bromodomain-containing protein 4	Homo sapiens	8	Homologous protein			66670	CHEMBL2177039	23095041	J. Med. Chem.	2012	55	22	9831
71271805	COc1ccc(cc1)S(=O)(=O)Nc2ccc3NC(=O)N(C)Cc3c2	12134085	IC50						=	880	nM		6.06		A			BAO_0000190	UO_0000065	http://www.openphacts.org/units/Nanomolar	878136	CHEMBL2183681	B	Inhibition of BRD4 isoform 1 by AlphaScreen assay	1	Scientific Literature				Autocuration	BAO_0000357	103454	CHEMBL1163125	SINGLE PROTEIN	O60885	Bromodomain-containing protein 4	Homo sapiens	8	Homologous protein			66670	CHEMBL2177039	23095041	J. Med. Chem.	2012	55	22	9831
71271897	CN1Cc2cc(NS(=O)(=O)c3ccccc3C)ccc2NC1=O	12134091	IC50						=	220	nM		6.66		A			BAO_0000190	UO_0000065	http://www.openphacts.org/units/Nanomolar	878136	CHEMBL2183681	B	Inhibition of BRD4 isoform 1 by AlphaScreen assay	1	Scientific Literature				Autocuration	BAO_0000357	103454	CHEMBL1163125	SINGLE PROTEIN	O60885	Bromodomain-containing protein 4	Homo sapiens	8	Homologous protein			66670	CHEMBL2177039	23095041	J. Med. Chem.	2012	55	22	9831
71271969	CN1Cc2cc(ccc2NC1=O)S(=O)(=O)Nc3ccccc3	12134093	IC50						=	4400	nM		5.36		A			BAO_0000190	UO_0000065	http://www.openphacts.org/units/Nanomolar	878136	CHEMBL2183681	B	Inhibition of BRD4 isoform 1 by AlphaScreen assay	1	Scientific Literature				Autocuration	BAO_0000357	103454	CHEMBL1163125	SINGLE PROTEIN	O60885	Bromodomain-containing protein 4	Homo sapiens	8	Homologous protein			66670	CHEMBL2177039	23095041	J. Med. Chem.	2012	55	22	9831
71272064	CN1Cc2cc(NS(=O)(=O)c3ccccc3F)ccc2NC1=O	12134089	IC50						=	360	nM		6.44		A			BAO_0000190	UO_0000065	http://www.openphacts.org/units/Nanomolar	878136	CHEMBL2183681	B	Inhibition of BRD4 isoform 1 by AlphaScreen assay	1	Scientific Literature				Autocuration	BAO_0000357	103454	CHEMBL1163125	SINGLE PROTEIN	O60885	Bromodomain-containing protein 4	Homo sapiens	8	Homologous protein			66670	CHEMBL2177039	23095041	J. Med. Chem.	2012	55	22	9831
71272103	COc1cccc(c1)S(=O)(=O)Nc2ccc3NC(=O)N(C)Cc3c2	12134086	IC50						=	730	nM		6.14		A			BAO_0000190	UO_0000065	http://www.openphacts.org/units/Nanomolar	878136	CHEMBL2183681	B	Inhibition of BRD4 isoform 1 by AlphaScreen assay	1	Scientific Literature				Autocuration	BAO_0000357	103454	CHEMBL1163125	SINGLE PROTEIN	O60885	Bromodomain-containing protein 4	Homo sapiens	8	Homologous protein			66670	CHEMBL2177039	23095041	J. Med. Chem.	2012	55	22	9831
71272293	CN1Cc2cc(NS(=O)(=O)c3ccc(F)cc3Cl)ccc2NC1=O	12134092	IC50						=	180	nM		6.74		A			BAO_0000190	UO_0000065	http://www.openphacts.org/units/Nanomolar	878136	CHEMBL2183681	B	Inhibition of BRD4 isoform 1 by AlphaScreen assay	1	Scientific Literature				Autocuration	BAO_0000357	103454	CHEMBL1163125	SINGLE PROTEIN	O60885	Bromodomain-containing protein 4	Homo sapiens	8	Homologous protein			66670	CHEMBL2177039	23095041	J. Med. Chem.	2012	55	22	9831
71272605	CN1Cc2cc(NS(=O)(=O)c3ccc(cc3)C#N)ccc2NC1=O	12134083	IC50						=	2300	nM		5.64		A			BAO_0000190	UO_0000065	http://www.openphacts.org/units/Nanomolar	878136	CHEMBL2183681	B	Inhibition of BRD4 isoform 1 by AlphaScreen assay	1	Scientific Literature				Autocuration	BAO_0000357	103454	CHEMBL1163125	SINGLE PROTEIN	O60885	Bromodomain-containing protein 4	Homo sapiens	8	Homologous protein			66670	CHEMBL2177039	23095041	J. Med. Chem.	2012	55	22	9831
71297183	CCCC(=O)Nc1cc(NS(=O)(=O)c2cccs2)cc(c1)C3=CSC(=O)N3	12733078	IC50						=	790	nM		6.1		A			BAO_0000190	UO_0000065	http://www.openphacts.org/units/Nanomolar	953486	CHEMBL2351097	B	Displacement of FITC-labeled (+)-JQ1 from bromodomain BRD4(1) (unknown origin) expressed in Escherichia coli BL21(DE3) after 4 hrs by fluorescence anisotropy assay	1	Scientific Literature	Homo sapiens		9606	Autocuration	BAO_0000019	103454	CHEMBL1163125	SINGLE PROTEIN	O60885	Bromodomain-containing protein 4	Homo sapiens	9	Protein			72867	CHEMBL2346589	23530754	J. Med. Chem.	2013	56	10	3833
71297184	O=C1NC(=CS1)c2cccc(NS(=O)(=O)c3cccs3)c2	12733091	IC50						=	4100	nM		5.39		A			BAO_0000190	UO_0000065	http://www.openphacts.org/units/Nanomolar	953486	CHEMBL2351097	B	Displacement of FITC-labeled (+)-JQ1 from bromodomain BRD4(1) (unknown origin) expressed in Escherichia coli BL21(DE3) after 4 hrs by fluorescence anisotropy assay	1	Scientific Literature	Homo sapiens		9606	Autocuration	BAO_0000019	103454	CHEMBL1163125	SINGLE PROTEIN	O60885	Bromodomain-containing protein 4	Homo sapiens	9	Protein			72867	CHEMBL2346589	23530754	J. Med. Chem.	2013	56	10	3833
71297185	O=C1NC(=CS1)c2cccc(NS(=O)(=O)Cc3ccccc3)c2	12733092	IC50						=	4100	nM		5.39		A			BAO_0000190	UO_0000065	http://www.openphacts.org/units/Nanomolar	953486	CHEMBL2351097	B	Displacement of FITC-labeled (+)-JQ1 from bromodomain BRD4(1) (unknown origin) expressed in Escherichia coli BL21(DE3) after 4 hrs by fluorescence anisotropy assay	1	Scientific Literature	Homo sapiens		9606	Autocuration	BAO_0000019	103454	CHEMBL1163125	SINGLE PROTEIN	O60885	Bromodomain-containing protein 4	Homo sapiens	9	Protein			72867	CHEMBL2346589	23530754	J. Med. Chem.	2013	56	10	3833
71450122	CN1Cc2cc(NS(=O)(=O)c3ccccc3)ccc2NC1=O	12134084	IC50						=	880	nM		6.06		A			BAO_0000190	UO_0000065	http://www.openphacts.org/units/Nanomolar	878136	CHEMBL2183681	B	Inhibition of BRD4 isoform 1 by AlphaScreen assay	1	Scientific Literature				Autocuration	BAO_0000357	103454	CHEMBL1163125	SINGLE PROTEIN	O60885	Bromodomain-containing protein 4	Homo sapiens	8	Homologous protein			66670	CHEMBL2177039	23095041	J. Med. Chem.	2012	55	22	9831
71459124	CN1Cc2cc(NS(=O)(=O)c3ccccc3C(F)(F)F)ccc2NC1=O	12134087	IC50						=	470	nM		6.33		A			BAO_0000190	UO_0000065	http://www.openphacts.org/units/Nanomolar	878136	CHEMBL2183681	B	Inhibition of BRD4 isoform 1 by AlphaScreen assay	1	Scientific Literature				Autocuration	BAO_0000357	103454	CHEMBL1163125	SINGLE PROTEIN	O60885	Bromodomain-containing protein 4	Homo sapiens	8	Homologous protein			66670	CHEMBL2177039	23095041	J. Med. Chem.	2012	55	22	9831
71624785	CCOc1cc(cc(c1)c2c(C)onc2C)C(O)c3cccc(F)c3	12679303	IC50						=	1700	nM		5.77		A			BAO_0000190	UO_0000065	http://www.openphacts.org/units/Nanomolar	944376	CHEMBL2344880	B	Binding affinity to human BRD4 bromodomain 1 using H4Ac4 peptide by amplified luminescent proximity homogeneous assay	1	Scientific Literature	Homo sapiens		9606	Autocuration	BAO_0000357	103454	CHEMBL1163125	SINGLE PROTEIN	O60885	Bromodomain-containing protein 4	Homo sapiens	9	Protein			72697	CHEMBL2331285	23517011	J. Med. Chem.	2013	56	8	3217
71661331	O=C1NC(=CS1)c2cccc(NS(=O)(=O)c3cccc4cccnc34)c2	12733051	Inhibition						=	45.7	%		4.22615	50	N			BAO_0000201	UO_0000187	http://qudt.org/vocab/unit#Percent	953485	CHEMBL2351096	B	Displacement of FITC-labeled (+)-JQ1 from bromodomain BRD4(1) (unknown origin) expressed in Escherichia coli BL21(DE3) at 50 uM after 4 hrs by fluorescence anisotropy assay relative to control	1	Scientific Literature	Homo sapiens		9606	Autocuration	BAO_0000019	103454	CHEMBL1163125	SINGLE PROTEIN	O60885	Bromodomain-containing protein 4	Homo sapiens	9	Protein			72867	CHEMBL2346589	23530754	J. Med. Chem.	2013	56	10	3833
71661332	Fc1ccc(cc1)S(=O)(=O)Nc2cccc(c2)C3=CSC(=O)N3	12733090	IC50						=	3700	nM		5.43		A			BAO_0000190	UO_0000065	http://www.openphacts.org/units/Nanomolar	953486	CHEMBL2351097	B	Displacement of FITC-labeled (+)-JQ1 from bromodomain BRD4(1) (unknown origin) expressed in Escherichia coli BL21(DE3) after 4 hrs by fluorescence anisotropy assay	1	Scientific Literature	Homo sapiens		9606	Autocuration	BAO_0000019	103454	CHEMBL1163125	SINGLE PROTEIN	O60885	Bromodomain-containing protein 4	Homo sapiens	9	Protein			72867	CHEMBL2346589	23530754	J. Med. Chem.	2013	56	10	3833
71661333	O=C1NC(=CS1)c2cccc(NS(=O)(=O)c3cccnc3)c2	12733089	IC50						=	10000	nM		5		A			BAO_0000190	UO_0000065	http://www.openphacts.org/units/Nanomolar	953486	CHEMBL2351097	B	Displacement of FITC-labeled (+)-JQ1 from bromodomain BRD4(1) (unknown origin) expressed in Escherichia coli BL21(DE3) after 4 hrs by fluorescence anisotropy assay	1	Scientific Literature	Homo sapiens		9606	Autocuration	BAO_0000019	103454	CHEMBL1163125	SINGLE PROTEIN	O60885	Bromodomain-containing protein 4	Homo sapiens	9	Protein			72867	CHEMBL2346589	23530754	J. Med. Chem.	2013	56	10	3833
71661334	O=C(Cc1ccccc1)Nc2cccc(c2)C3=CSC(=O)N3	12733049	Inhibition						=	45.6	%		4.2244	50	N			BAO_0000201	UO_0000187	http://qudt.org/vocab/unit#Percent	953485	CHEMBL2351096	B	Displacement of FITC-labeled (+)-JQ1 from bromodomain BRD4(1) (unknown origin) expressed in Escherichia coli BL21(DE3) at 50 uM after 4 hrs by fluorescence anisotropy assay relative to control	1	Scientific Literature	Homo sapiens		9606	Autocuration	BAO_0000019	103454	CHEMBL1163125	SINGLE PROTEIN	O60885	Bromodomain-containing protein 4	Homo sapiens	9	Protein			72867	CHEMBL2346589	23530754	J. Med. Chem.	2013	56	10	3833
71661335	O=C1NC(=CS1)c2cccc(NCCc3ccccc3)c2	12733088	IC50						=	22800	nM		4.64		N			BAO_0000190	UO_0000065	http://www.openphacts.org/units/Nanomolar	953486	CHEMBL2351097	B	Displacement of FITC-labeled (+)-JQ1 from bromodomain BRD4(1) (unknown origin) expressed in Escherichia coli BL21(DE3) after 4 hrs by fluorescence anisotropy assay	1	Scientific Literature	Homo sapiens		9606	Autocuration	BAO_0000019	103454	CHEMBL1163125	SINGLE PROTEIN	O60885	Bromodomain-containing protein 4	Homo sapiens	9	Protein			72867	CHEMBL2346589	23530754	J. Med. Chem.	2013	56	10	3833
71661522	Nc1ccc(cc1O)C2=CSC(=O)N2	12733095	IC50						=	23800	nM		4.62		N			BAO_0000190	UO_0000065	http://www.openphacts.org/units/Nanomolar	953486	CHEMBL2351097	B	Displacement of FITC-labeled (+)-JQ1 from bromodomain BRD4(1) (unknown origin) expressed in Escherichia coli BL21(DE3) after 4 hrs by fluorescence anisotropy assay	1	Scientific Literature	Homo sapiens		9606	Autocuration	BAO_0000019	103454	CHEMBL1163125	SINGLE PROTEIN	O60885	Bromodomain-containing protein 4	Homo sapiens	9	Protein			72867	CHEMBL2346589	23530754	J. Med. Chem.	2013	56	10	3833
71661523	O=C1NC(=CS1)c2ccc(NS(=O)(=O)c3cccs3)cc2	12733050	Inhibition						=	38.6	%		4.09945	50	N			BAO_0000201	UO_0000187	http://qudt.org/vocab/unit#Percent	953485	CHEMBL2351096	B	Displacement of FITC-labeled (+)-JQ1 from bromodomain BRD4(1) (unknown origin) expressed in Escherichia coli BL21(DE3) at 50 uM after 4 hrs by fluorescence anisotropy assay relative to control	1	Scientific Literature	Homo sapiens		9606	Autocuration	BAO_0000019	103454	CHEMBL1163125	SINGLE PROTEIN	O60885	Bromodomain-containing protein 4	Homo sapiens	9	Protein			72867	CHEMBL2346589	23530754	J. Med. Chem.	2013	56	10	3833
71661524	Oc1cc(ccc1NS(=O)(=O)c2cccs2)C3=CSC(=O)N3	12733087	IC50						=	3300	nM		5.48		A			BAO_0000190	UO_0000065	http://www.openphacts.org/units/Nanomolar	953486	CHEMBL2351097	B	Displacement of FITC-labeled (+)-JQ1 from bromodomain BRD4(1) (unknown origin) expressed in Escherichia coli BL21(DE3) after 4 hrs by fluorescence anisotropy assay	1	Scientific Literature	Homo sapiens		9606	Autocuration	BAO_0000019	103454	CHEMBL1163125	SINGLE PROTEIN	O60885	Bromodomain-containing protein 4	Homo sapiens	9	Protein			72867	CHEMBL2346589	23530754	J. Med. Chem.	2013	56	10	3833
71661707	O=C(Cc1ccccc1)Nc2cc(ccc2NS(=O)(=O)c3cccs3)C4=CSC(=O)N4	12733085	IC50						=	3500	nM		5.46		A			BAO_0000190	UO_0000065	http://www.openphacts.org/units/Nanomolar	953486	CHEMBL2351097	B	Displacement of FITC-labeled (+)-JQ1 from bromodomain BRD4(1) (unknown origin) expressed in Escherichia coli BL21(DE3) after 4 hrs by fluorescence anisotropy assay	1	Scientific Literature	Homo sapiens		9606	Autocuration	BAO_0000019	103454	CHEMBL1163125	SINGLE PROTEIN	O60885	Bromodomain-containing protein 4	Homo sapiens	9	Protein			72867	CHEMBL2346589	23530754	J. Med. Chem.	2013	56	10	3833
71661708	O=C(CCc1ccccc1)Nc2cc(ccc2NS(=O)(=O)c3cccs3)C4=CSC(=O)N4	12733084	IC50						=	2600	nM		5.59		A			BAO_0000190	UO_0000065	http://www.openphacts.org/units/Nanomolar	953486	CHEMBL2351097	B	Displacement of FITC-labeled (+)-JQ1 from bromodomain BRD4(1) (unknown origin) expressed in Escherichia coli BL21(DE3) after 4 hrs by fluorescence anisotropy assay	1	Scientific Literature	Homo sapiens		9606	Autocuration	BAO_0000019	103454	CHEMBL1163125	SINGLE PROTEIN	O60885	Bromodomain-containing protein 4	Homo sapiens	9	Protein			72867	CHEMBL2346589	23530754	J. Med. Chem.	2013	56	10	3833
71661709	CCCC(=O)Nc1cc(ccc1NS(=O)(=O)c2cccs2)C3=CSC(=O)N3	12733083	IC50						=	2400	nM		5.62		A			BAO_0000190	UO_0000065	http://www.openphacts.org/units/Nanomolar	953486	CHEMBL2351097	B	Displacement of FITC-labeled (+)-JQ1 from bromodomain BRD4(1) (unknown origin) expressed in Escherichia coli BL21(DE3) after 4 hrs by fluorescence anisotropy assay	1	Scientific Literature	Homo sapiens		9606	Autocuration	BAO_0000019	103454	CHEMBL1163125	SINGLE PROTEIN	O60885	Bromodomain-containing protein 4	Homo sapiens	9	Protein			72867	CHEMBL2346589	23530754	J. Med. Chem.	2013	56	10	3833
71661710	O=C(Nc1cc(ccc1NS(=O)(=O)c2cccs2)C3=CSC(=O)N3)C4CCCC4	12733082	IC50						=	2500	nM		5.6		A			BAO_0000190	UO_0000065	http://www.openphacts.org/units/Nanomolar	953486	CHEMBL2351097	B	Displacement of FITC-labeled (+)-JQ1 from bromodomain BRD4(1) (unknown origin) expressed in Escherichia coli BL21(DE3) after 4 hrs by fluorescence anisotropy assay	1	Scientific Literature	Homo sapiens		9606	Autocuration	BAO_0000019	103454	CHEMBL1163125	SINGLE PROTEIN	O60885	Bromodomain-containing protein 4	Homo sapiens	9	Protein			72867	CHEMBL2346589	23530754	J. Med. Chem.	2013	56	10	3833
71661711	O=C(Nc1cc(ccc1NS(=O)(=O)Cc2ccccc2)C3=CSC(=O)N3)C4CCCC4	12733076	Inhibition						=	20.2	%		3.70438	50	N			BAO_0000201	UO_0000187	http://qudt.org/vocab/unit#Percent	953485	CHEMBL2351096	B	Displacement of FITC-labeled (+)-JQ1 from bromodomain BRD4(1) (unknown origin) expressed in Escherichia coli BL21(DE3) at 50 uM after 4 hrs by fluorescence anisotropy assay relative to control	1	Scientific Literature	Homo sapiens		9606	Autocuration	BAO_0000019	103454	CHEMBL1163125	SINGLE PROTEIN	O60885	Bromodomain-containing protein 4	Homo sapiens	9	Protein			72867	CHEMBL2346589	23530754	J. Med. Chem.	2013	56	10	3833
71661712	O=C(Nc1cc(NS(=O)(=O)c2cccs2)cc(c1)C3=CSC(=O)N3)c4cccs4	12733081	IC50						=	230	nM		6.64		A			BAO_0000190	UO_0000065	http://www.openphacts.org/units/Nanomolar	953486	CHEMBL2351097	B	Displacement of FITC-labeled (+)-JQ1 from bromodomain BRD4(1) (unknown origin) expressed in Escherichia coli BL21(DE3) after 4 hrs by fluorescence anisotropy assay	1	Scientific Literature	Homo sapiens		9606	Autocuration	BAO_0000019	103454	CHEMBL1163125	SINGLE PROTEIN	O60885	Bromodomain-containing protein 4	Homo sapiens	9	Protein			72867	CHEMBL2346589	23530754	J. Med. Chem.	2013	56	10	3833
71664045	Nc1cc(N)cc(c1)C2=CSC(=O)N2	12733094	IC50						=	50700	nM		4.29		N			BAO_0000190	UO_0000065	http://www.openphacts.org/units/Nanomolar	953486	CHEMBL2351097	B	Displacement of FITC-labeled (+)-JQ1 from bromodomain BRD4(1) (unknown origin) expressed in Escherichia coli BL21(DE3) after 4 hrs by fluorescence anisotropy assay	1	Scientific Literature	Homo sapiens		9606	Autocuration	BAO_0000019	103454	CHEMBL1163125	SINGLE PROTEIN	O60885	Bromodomain-containing protein 4	Homo sapiens	9	Protein			72867	CHEMBL2346589	23530754	J. Med. Chem.	2013	56	10	3833
71664046	Nc1cc(NS(=O)(=O)c2cccs2)cc(c1)C3=CSC(=O)N3	12733086	IC50						=	2600	nM		5.59		A			BAO_0000190	UO_0000065	http://www.openphacts.org/units/Nanomolar	953486	CHEMBL2351097	B	Displacement of FITC-labeled (+)-JQ1 from bromodomain BRD4(1) (unknown origin) expressed in Escherichia coli BL21(DE3) after 4 hrs by fluorescence anisotropy assay	1	Scientific Literature	Homo sapiens		9606	Autocuration	BAO_0000019	103454	CHEMBL1163125	SINGLE PROTEIN	O60885	Bromodomain-containing protein 4	Homo sapiens	9	Protein			72867	CHEMBL2346589	23530754	J. Med. Chem.	2013	56	10	3833
71664047	COc1ccc(cc1)S(=O)(=O)Nc2cccc(c2)C3=CSC(=O)N3	12733093	IC50						=	4400	nM		5.36		A			BAO_0000190	UO_0000065	http://www.openphacts.org/units/Nanomolar	953486	CHEMBL2351097	B	Displacement of FITC-labeled (+)-JQ1 from bromodomain BRD4(1) (unknown origin) expressed in Escherichia coli BL21(DE3) after 4 hrs by fluorescence anisotropy assay	1	Scientific Literature	Homo sapiens		9606	Autocuration	BAO_0000019	103454	CHEMBL1163125	SINGLE PROTEIN	O60885	Bromodomain-containing protein 4	Homo sapiens	9	Protein			72867	CHEMBL2346589	23530754	J. Med. Chem.	2013	56	10	3833
71717163	Cc1[nH]nc2[C@H](CC(=O)OC(C)(C)C)N=C(c3ccc(Cl)cc3)c4c(C)c(C)sc4c12	12733057	IC50						=	58.7	nM		7.23		A			BAO_0000190	UO_0000065	http://www.openphacts.org/units/Nanomolar	953486	CHEMBL2351097	B	Displacement of FITC-labeled (+)-JQ1 from bromodomain BRD4(1) (unknown origin) expressed in Escherichia coli BL21(DE3) after 4 hrs by fluorescence anisotropy assay	1	Scientific Literature	Homo sapiens		9606	Autocuration	BAO_0000019	103454	CHEMBL1163125	SINGLE PROTEIN	O60885	Bromodomain-containing protein 4	Homo sapiens	9	Protein			72867	CHEMBL2346589	23530754	J. Med. Chem.	2013	56	10	3833
72201024	Cc1onc(C)c1c2ccc3c(c2)ncn3Cc4ccc(Cl)cc4	14527079	IC50						=	2511.89	nM		5.6		A			BAO_0000190	UO_0000065	http://www.openphacts.org/units/Nanomolar	1327497	CHEMBL3226597	B	Inhibition of BRD4 bromodomain-1 (unknown origin) by AlphaScreen assay	1	Scientific Literature	Homo sapiens		9606	Autocuration	BAO_0000357	103454	CHEMBL1163125	SINGLE PROTEIN	O60885	Bromodomain-containing protein 4	Homo sapiens	9	Protein			81949	CHEMBL3217564		MedChemComm	2013	4	1	140
72684073	Cc1onc(C)c1c2ccc3CCC(O)(c4ccccc4)c3c2	14527072	IC50						=	1258.93	nM		5.9		A			BAO_0000190	UO_0000065	http://www.openphacts.org/units/Nanomolar	1327497	CHEMBL3226597	B	Inhibition of BRD4 bromodomain-1 (unknown origin) by AlphaScreen assay	1	Scientific Literature	Homo sapiens		9606	Autocuration	BAO_0000357	103454	CHEMBL1163125	SINGLE PROTEIN	O60885	Bromodomain-containing protein 4	Homo sapiens	9	Protein			81949	CHEMBL3217564		MedChemComm	2013	4	1	140
72713634	CN(Cc1ccc(C)cc1)c2cc(C)nc3nc(N)nn23	13477937	IC50						=	66000	nM		4.18		N			BAO_0000190	UO_0000065	http://www.openphacts.org/units/Nanomolar	988295	CHEMBL2439861	B	Inhibition of His-tagged first bromodomain of BRD4 (unknown origin) using H-SGRGK(Ac)GGK(Ac)GLGK-(Ac)GGAK(Ac)RHRK(Biotin)-OH as substrate preincubated for 30 mins prior to substrate addition measured after 30 mins by AlphaScreen assay	1	Scientific Literature	Homo sapiens		9606	Autocuration	BAO_0000357	103454	CHEMBL1163125	SINGLE PROTEIN	O60885	Bromodomain-containing protein 4	Homo sapiens	9	Protein			75196	CHEMBL2434916	24090311	J. Med. Chem.	2013	56	20	8073
72713635	Cc1ccc(CNc2cc(C)nc3nc(N)nn23)cc1	13477936	IC50						=	74000	nM		4.13		N			BAO_0000190	UO_0000065	http://www.openphacts.org/units/Nanomolar	988295	CHEMBL2439861	B	Inhibition of His-tagged first bromodomain of BRD4 (unknown origin) using H-SGRGK(Ac)GGK(Ac)GLGK-(Ac)GGAK(Ac)RHRK(Biotin)-OH as substrate preincubated for 30 mins prior to substrate addition measured after 30 mins by AlphaScreen assay	1	Scientific Literature	Homo sapiens		9606	Autocuration	BAO_0000357	103454	CHEMBL1163125	SINGLE PROTEIN	O60885	Bromodomain-containing protein 4	Homo sapiens	9	Protein			75196	CHEMBL2434916	24090311	J. Med. Chem.	2013	56	20	8073
72713636	CN(Cc1ccc(Cl)s1)c2cc(C)nc3nc(N)nn23	13477935	IC50						=	28000	nM		4.55		N			BAO_0000190	UO_0000065	http://www.openphacts.org/units/Nanomolar	988295	CHEMBL2439861	B	Inhibition of His-tagged first bromodomain of BRD4 (unknown origin) using H-SGRGK(Ac)GGK(Ac)GLGK-(Ac)GGAK(Ac)RHRK(Biotin)-OH as substrate preincubated for 30 mins prior to substrate addition measured after 30 mins by AlphaScreen assay	1	Scientific Literature	Homo sapiens		9606	Autocuration	BAO_0000357	103454	CHEMBL1163125	SINGLE PROTEIN	O60885	Bromodomain-containing protein 4	Homo sapiens	9	Protein			75196	CHEMBL2434916	24090311	J. Med. Chem.	2013	56	20	8073
72735067	CC1=CC(=C(C=C1NN=C2C=C(C(=O)C(=C2)C)C)S(=O)(=O)O)C		Ki									4.92	5.30803		A						1054713			Displacement of fluorescein-labeled MS574 from recombinant human BRD4 BrD1 after 1 hr by fluorescence anisotropy assay												Bromodomain-containing protein 4
72735068	CC1=CC(=NNC2=CC(=CC=C2)S(=O)(=O)NC3=CC=CC=N3)C=C(C1=O)C		Ki									5.97	5.22403		A						1054713			Displacement of fluorescein-labeled MS574 from recombinant human BRD4 BrD1 after 1 hr by fluorescence anisotropy assay												Bromodomain-containing protein 4
72735069	CC1=CC(=NNC2=CC=C(C=C2)S(=O)(=O)NCC3=CC=C(C=C3)C(F)(F)F)C=C(C1=O)C		Ki									100	4	4	N						1054713			Displacement of fluorescein-labeled MS574 from recombinant human BRD4 BrD1 after 1 hr by fluorescence anisotropy assay												Bromodomain-containing protein 4
72735070	CC1=CC(=NNC2=CC=C(C=C2)S(=O)(=O)N(C)C3=CC=CC=N3)C=C(C1=O)C		Ki									7.89	5.10292		A						1054713			Displacement of fluorescein-labeled MS574 from recombinant human BRD4 BrD1 after 1 hr by fluorescence anisotropy assay												Bromodomain-containing protein 4
72735071	CC1=CC(=NNC2=CC=C(C=C2)S(=O)(=O)NC3=CC=CC(=C3)C(F)(F)F)C=C(C1=O)C		Ki									6.13	5.21254		A						1054713			Displacement of fluorescein-labeled MS574 from recombinant human BRD4 BrD1 after 1 hr by fluorescence anisotropy assay												Bromodomain-containing protein 4
72735072	CC1=CC(=NNC2=CC=C(C=C2)S(=O)(=O)NC3=NC=CC(=C3)Cl)C=C(C1=O)C		Ki									0.9	6.04576		A						1054713			Displacement of fluorescein-labeled MS574 from recombinant human BRD4 BrD1 after 1 hr by fluorescence anisotropy assay												Bromodomain-containing protein 4
72735256	CC1=CC(=NNC2=CC=C(C=C2)S(=O)(=O)NC3=NC=C(C=C3)C(=O)O)C=C(C1=O)C		Ki									0.32	6.49485		A						1054713			Displacement of fluorescein-labeled MS574 from recombinant human BRD4 BrD1 after 1 hr by fluorescence anisotropy assay												Bromodomain-containing protein 4
72735257	CC1=CC(=NNC2=CC=C(C=C2)S(=O)(=O)NC3=NC=C(C=C3)Cl)C=C(C1=O)C		Ki									0.73	6.13668		A						1054713			Displacement of fluorescein-labeled MS574 from recombinant human BRD4 BrD1 after 1 hr by fluorescence anisotropy assay												Bromodomain-containing protein 4
72735258	CC1=CC(=NNC2=CC=C(C=C2)S(=O)(=O)NC3=NC=C(C=C3)Br)C=C(C1=O)C		Ki									6.54	5.18442		A						1054713			Displacement of fluorescein-labeled MS574 from recombinant human BRD4 BrD1 after 1 hr by fluorescence anisotropy assay												Bromodomain-containing protein 4
72735259	CC1=CC(=NNC2=CC=C(C=C2)S(=O)(=O)NC3=CC=C(C=C3)C(=O)N)C=C(C1=O)C		Ki									9.6	5.01773		A						1054713			Displacement of fluorescein-labeled MS574 from recombinant human BRD4 BrD1 after 1 hr by fluorescence anisotropy assay												Bromodomain-containing protein 4
72735260	CC1=CC(=NNC2=CC=C(C=C2)S(=O)(=O)NC3=NC=C(C=C3)F)C=C(C1=O)C		Ki									1.3	5.88606		A						1054713			Displacement of fluorescein-labeled MS574 from recombinant human BRD4 BrD1 after 1 hr by fluorescence anisotropy assay												Bromodomain-containing protein 4
72735261	CC1=CC(=NNC2=CC=C(C=C2)S(=O)(=O)NC3=CC=C(C=C3)F)C=C(C1=O)C		Ki									1.84	5.73518		A						1054713			Displacement of fluorescein-labeled MS574 from recombinant human BRD4 BrD1 after 1 hr by fluorescence anisotropy assay												Bromodomain-containing protein 4
72735429	CC1=CC(=NNC2=CC(=C(C=C2)S(=O)(=O)NC3=CC=CC=N3)OC)C=C(C1=O)C		Ki									3.13	5.50446		A						1054713			Displacement of fluorescein-labeled MS574 from recombinant human BRD4 BrD1 after 1 hr by fluorescence anisotropy assay												Bromodomain-containing protein 4
72735434	CC1=CC(=CC(=O)C1=O)NNC2=CC=C(C=C2)S(=O)(=O)NC3=CC=CC=N3		Ki									2.39	5.6216		A						1054713			Displacement of fluorescein-labeled MS574 from recombinant human BRD4 BrD1 after 1 hr by fluorescence anisotropy assay												Bromodomain-containing protein 4
72735435	C1=CC=NC(=C1)NS(=O)(=O)C2=CC=C(C=C2)NNC3=CC(=O)C(=O)C=C3		Ki									4.59	5.33819		A						1054713			Displacement of fluorescein-labeled MS574 from recombinant human BRD4 BrD1 after 1 hr by fluorescence anisotropy assay												Bromodomain-containing protein 4
72735611	CC1=CC(=CC(=C1OC)C)N=NC2=CC=C(C=C2)S(=O)(=O)NC3=CC=CC=N3		Ki												N						1054713			Displacement of fluorescein-labeled MS574 from recombinant human BRD4 BrD1 after 1 hr by fluorescence anisotropy assay												Bromodomain-containing protein 4
72735612	CC1=CC(=CC(=C1NC(=O)C)C)N=NC2=CC=C(C=C2)S(=O)(=O)NC3=CC=CC=N3		Ki												N						1054713			Displacement of fluorescein-labeled MS574 from recombinant human BRD4 BrD1 after 1 hr by fluorescence anisotropy assay												Bromodomain-containing protein 4
72735613	CC(C)(C)C1=CC(=NNC2=CC=C(C=C2)S(=O)(=O)NC3=CC=CC=N3)C=C(C1=O)C(C)(C)C		Ki												N						1054713			Displacement of fluorescein-labeled MS574 from recombinant human BRD4 BrD1 after 1 hr by fluorescence anisotropy assay												Bromodomain-containing protein 4
72945553	Cc1noc2[C@H](CC(=O)OC(C)(C)C)N=C(c3ccc(Cl)cc3)c4c(C)c(C)sc4c12	13457089	IC50						=	290	nM		6.54		A			BAO_0000190	UO_0000065	http://www.openphacts.org/units/Nanomolar	986181	CHEMBL2433086	B	Inhibition of His-FLAG-tagged BRD4 binding domain1 (unknown origin) binding to H4-TetraAc-biotin peptide after 20 mins by AlphaLISA	1	Scientific Literature	Homo sapiens		9606	Autocuration	BAO_0000357	103454	CHEMBL1163125	SINGLE PROTEIN	O60885	Bromodomain-containing protein 4	Homo sapiens	9	Protein			74979	CHEMBL2429789		ACS Med. Chem. Lett.	2013	4	9	835
72945554	Cc1noc2[C@H](CC(=O)N)N=C(c3cccc(Cl)c3)c4c(C)c(C)sc4c12	13457077	IC50						=	74	nM		7.13		A			BAO_0000190	UO_0000065	http://www.openphacts.org/units/Nanomolar	986181	CHEMBL2433086	B	Inhibition of His-FLAG-tagged BRD4 binding domain1 (unknown origin) binding to H4-TetraAc-biotin peptide after 20 mins by AlphaLISA	1	Scientific Literature	Homo sapiens		9606	Autocuration	BAO_0000357	103454	CHEMBL1163125	SINGLE PROTEIN	O60885	Bromodomain-containing protein 4	Homo sapiens	9	Protein			74979	CHEMBL2429789		ACS Med. Chem. Lett.	2013	4	9	835
72945555	Cc1noc2[C@H](CC(=O)N)N=C(c3ccccc3Cl)c4c(C)c(C)sc4c12	13457076	IC50						=	250	nM		6.6		A			BAO_0000190	UO_0000065	http://www.openphacts.org/units/Nanomolar	986181	CHEMBL2433086	B	Inhibition of His-FLAG-tagged BRD4 binding domain1 (unknown origin) binding to H4-TetraAc-biotin peptide after 20 mins by AlphaLISA	1	Scientific Literature	Homo sapiens		9606	Autocuration	BAO_0000357	103454	CHEMBL1163125	SINGLE PROTEIN	O60885	Bromodomain-containing protein 4	Homo sapiens	9	Protein			74979	CHEMBL2429789		ACS Med. Chem. Lett.	2013	4	9	835
73347805	Cc1noc2[C@H](CC(=O)N)N=C(c3ccc(cc3)C#N)c4c(C)c(C)sc4c12	13457074	IC50						=	33	nM		7.48		A			BAO_0000190	UO_0000065	http://www.openphacts.org/units/Nanomolar	986181	CHEMBL2433086	B	Inhibition of His-FLAG-tagged BRD4 binding domain1 (unknown origin) binding to H4-TetraAc-biotin peptide after 20 mins by AlphaLISA	1	Scientific Literature	Homo sapiens		9606	Autocuration	BAO_0000357	103454	CHEMBL1163125	SINGLE PROTEIN	O60885	Bromodomain-containing protein 4	Homo sapiens	9	Protein			74979	CHEMBL2429789		ACS Med. Chem. Lett.	2013	4	9	835
73349345	Cc1noc2[C@H](CC(=O)N)N=C(c3ccc(Cl)cn3)c4c(C)c(C)sc4c12	13457072	IC50						=	72	nM		7.14		A			BAO_0000190	UO_0000065	http://www.openphacts.org/units/Nanomolar	986181	CHEMBL2433086	B	Inhibition of His-FLAG-tagged BRD4 binding domain1 (unknown origin) binding to H4-TetraAc-biotin peptide after 20 mins by AlphaLISA	1	Scientific Literature	Homo sapiens		9606	Autocuration	BAO_0000357	103454	CHEMBL1163125	SINGLE PROTEIN	O60885	Bromodomain-containing protein 4	Homo sapiens	9	Protein			74979	CHEMBL2429789		ACS Med. Chem. Lett.	2013	4	9	835
73349436	CC(C)CC1=N/C(=C\2/C=C(C(=O)N=C2)Cl)/N(N1)C3=C4C(=CC=C3)OCCO4		IC50									77	4.11351	4.11351	N						776065			Inhibition of His-tagged first bromodomain of BRD4 (unknown origin) using H-SGRGK(Ac)GGK(Ac)GLGK-(Ac)GGAK(Ac)RHRK(Biotin)-OH as substrate preincubated for 30 mins prior to substrate addition measured after 30 mins by AlphaScreen assay												Bromodomain-containing protein 4
73350913	Cc1noc2[C@H](CC(=O)N)N=C(c3ccccc3)c4c(C)c(C)sc4c12	13457075	IC50						=	29	nM		7.54		A			BAO_0000190	UO_0000065	http://www.openphacts.org/units/Nanomolar	986181	CHEMBL2433086	B	Inhibition of His-FLAG-tagged BRD4 binding domain1 (unknown origin) binding to H4-TetraAc-biotin peptide after 20 mins by AlphaLISA	1	Scientific Literature	Homo sapiens		9606	Autocuration	BAO_0000357	103454	CHEMBL1163125	SINGLE PROTEIN	O60885	Bromodomain-containing protein 4	Homo sapiens	9	Protein			74979	CHEMBL2429789		ACS Med. Chem. Lett.	2013	4	9	835
73350914	Cc1cc(Cl)ccc1C2=N[C@@H](CC(=O)N)c3onc(C)c3c4sc(C)c(C)c24	13457073	IC50						=	42	nM		7.38		A			BAO_0000190	UO_0000065	http://www.openphacts.org/units/Nanomolar	986181	CHEMBL2433086	B	Inhibition of His-FLAG-tagged BRD4 binding domain1 (unknown origin) binding to H4-TetraAc-biotin peptide after 20 mins by AlphaLISA	1	Scientific Literature	Homo sapiens		9606	Autocuration	BAO_0000357	103454	CHEMBL1163125	SINGLE PROTEIN	O60885	Bromodomain-containing protein 4	Homo sapiens	9	Protein			74979	CHEMBL2429789		ACS Med. Chem. Lett.	2013	4	9	835
73352402	CCCC1=N[C@@H](CC(=O)N)c2onc(C)c2c3sc(C)c(C)c13	13457068	IC50						=	300	nM		6.52		A			BAO_0000190	UO_0000065	http://www.openphacts.org/units/Nanomolar	986181	CHEMBL2433086	B	Inhibition of His-FLAG-tagged BRD4 binding domain1 (unknown origin) binding to H4-TetraAc-biotin peptide after 20 mins by AlphaLISA	1	Scientific Literature	Homo sapiens		9606	Autocuration	BAO_0000357	103454	CHEMBL1163125	SINGLE PROTEIN	O60885	Bromodomain-containing protein 4	Homo sapiens	9	Protein			74979	CHEMBL2429789		ACS Med. Chem. Lett.	2013	4	9	835
73353867	Cc1noc2[C@H](CC(=O)N)N=C(c3ccc(N)nc3)c4c(C)c(C)sc4c12	13457071	IC50						=	73	nM		7.14		A			BAO_0000190	UO_0000065	http://www.openphacts.org/units/Nanomolar	986181	CHEMBL2433086	B	Inhibition of His-FLAG-tagged BRD4 binding domain1 (unknown origin) binding to H4-TetraAc-biotin peptide after 20 mins by AlphaLISA	1	Scientific Literature	Homo sapiens		9606	Autocuration	BAO_0000357	103454	CHEMBL1163125	SINGLE PROTEIN	O60885	Bromodomain-containing protein 4	Homo sapiens	9	Protein			74979	CHEMBL2429789		ACS Med. Chem. Lett.	2013	4	9	835
73353948	COc1cc2c3NC(=O)N([C@H](C)c4ccccn4)c3cnc2cc1c5c(C)onc5C	13477951	Kd						=	100	nM		7		A			BAO_0000034	UO_0000065	http://www.openphacts.org/units/Nanomolar	988297	CHEMBL2439863	B	Binding affinity to first bromodomain of BRD4 (unknown origin)	1	Scientific Literature	Homo sapiens		9606	Autocuration	BAO_0000357	103454	CHEMBL1163125	SINGLE PROTEIN	O60885	Bromodomain-containing protein 4	Homo sapiens	9	Protein			75196	CHEMBL2434916	24090311	J. Med. Chem.	2013	56	20	8073
73355395	Cc1noc2[C@H](CC(=O)N)N=C(c3cncnc3)c4c(C)c(C)sc4c12	13457070	IC50						=	2500	nM		5.6		A			BAO_0000190	UO_0000065	http://www.openphacts.org/units/Nanomolar	986181	CHEMBL2433086	B	Inhibition of His-FLAG-tagged BRD4 binding domain1 (unknown origin) binding to H4-TetraAc-biotin peptide after 20 mins by AlphaLISA	1	Scientific Literature	Homo sapiens		9606	Autocuration	BAO_0000357	103454	CHEMBL1163125	SINGLE PROTEIN	O60885	Bromodomain-containing protein 4	Homo sapiens	9	Protein			74979	CHEMBL2429789		ACS Med. Chem. Lett.	2013	4	9	835
73357034	CC1=C(N=CC=C1)N2/C(=C/3\C=C(C(=O)N=C3)Cl)/N=C(N2)C4=CC=CC=C4		IC50												A						776065			Inhibition of His-tagged first bromodomain of BRD4 (unknown origin) using H-SGRGK(Ac)GGK(Ac)GLGK-(Ac)GGAK(Ac)RHRK(Biotin)-OH as substrate preincubated for 30 mins prior to substrate addition measured after 30 mins by AlphaScreen assay												Bromodomain-containing protein 4
73386670	CC1=C/C(=N\NC2=CC=C(C=C2)S(=O)(=O)NC3=CC=CC=N3)/C(=CC1=O)N		Ki									0.085	7.07058		A						1054713			Displacement of fluorescein-labeled MS574 from recombinant human BRD4 BrD1 after 1 hr by fluorescence anisotropy assay												Bromodomain-containing protein 4
73386671	CC1=C/C(=N\NC2=CC=C(C=C2)S(=O)(=O)NC3=CC=CC=N3)/C(=C(C1=O)C)N		Ki									0.15	6.82391		A						1054713			Displacement of fluorescein-labeled MS574 from recombinant human BRD4 BrD1 after 1 hr by fluorescence anisotropy assay												Bromodomain-containing protein 4
76309832	CC1=N/C(=N\NC2=CC=C(C=C2)S(=O)(=O)NC3=CC=CC=N3)/C(=C(C1=O)C=O)CO		Ki												N						1054713			Displacement of fluorescein-labeled MS574 from recombinant human BRD4 BrD1 after 1 hr by fluorescence anisotropy assay												Bromodomain-containing protein 4
76313547	COC1=C/C(=N\NC2=CC=C(C=C2)S(=O)(=O)NC3=CC=CC=N3)/C(=CC1=O)N		Ki									1.28	5.89279		A						1054713			Displacement of fluorescein-labeled MS574 from recombinant human BRD4 BrD1 after 1 hr by fluorescence anisotropy assay												Bromodomain-containing protein 4
76313548	CC1=C/C(=N/NC2=CC=C(C=C2)S(=O)(=O)NC3=CC=CC=N3)/N=C(C1=O)C		Ki									2.31	5.63639		A						1054713			Displacement of fluorescein-labeled MS574 from recombinant human BRD4 BrD1 after 1 hr by fluorescence anisotropy assay												Bromodomain-containing protein 4
76317060	C1CCC2=C(C1)/C(=N/NC3=CC=C(C=C3)S(=O)(=O)NC4=CC=CC=N4)/C=CC2=O		Ki												A						1054713			Displacement of fluorescein-labeled MS574 from recombinant human BRD4 BrD1 after 1 hr by fluorescence anisotropy assay												Bromodomain-containing protein 4
76317061	CC1=C(/C(=N/NC2=CC=C(C=C2)S(=O)(=O)NC3=CC=CC=N3)/N=C(C1=O)C)CO		Ki												N						1054713			Displacement of fluorescein-labeled MS574 from recombinant human BRD4 BrD1 after 1 hr by fluorescence anisotropy assay												Bromodomain-containing protein 4
76317442	Cc1nnc2c3ccccc3c(nn12)c4ccc(N5CCOCC5)c(NS(=O)(=O)C)c4	13891626	IC50						=	251.19	nM		6.6		A			BAO_0000190	UO_0000065	http://www.openphacts.org/units/Nanomolar	1287025	CHEMBL3111336	B	Displacement of H4Ac4 peptide from BRD4 bromodomain-1 (unknown origin) by AlphaScreen assay	1	Scientific Literature	Homo sapiens		9606	Autocuration	BAO_0000357	103454	CHEMBL1163125	SINGLE PROTEIN	O60885	Bromodomain-containing protein 4	Homo sapiens	9	Protein			76683	CHEMBL3108763	24313754	J. Med. Chem.	2014	57	2	462
76318560	CN[C@@H](CCCCNC(=O)C)C(=O)NC	13972329	IC50						=	7000000	nM		2.15		N	Outside typical range		BAO_0000190	UO_0000065	http://www.openphacts.org/units/Nanomolar	1298741	CHEMBL3136026	B	Inhibition of BRD4(1) (unknown origin) by Alpha screen binding assay	1	Scientific Literature	Homo sapiens		9606	Autocuration	BAO_0000357	103454	CHEMBL1163125	SINGLE PROTEIN	O60885	Bromodomain-containing protein 4	Homo sapiens	9	Protein			77333	CHEMBL3132839		MedChemComm	2014	5	3	288
76320770	C1=CC=C2C(=O)C=C/C(=N\NC3=CC=C(C=C3)S(=O)(=O)NC4=CC=CC=N4)/C2=C1		Ki												A						1054713			Displacement of fluorescein-labeled MS574 from recombinant human BRD4 BrD1 after 1 hr by fluorescence anisotropy assay												Bromodomain-containing protein 4
76320771	C1CC2=C(/C(=N/NC3=CC=C(C=C3)S(=O)(=O)NC4=CC=CC=N4)/C=CC2=O)NC1		Ki												A						1054713			Displacement of fluorescein-labeled MS574 from recombinant human BRD4 BrD1 after 1 hr by fluorescence anisotropy assay												Bromodomain-containing protein 4
76320772	CC1(CC\2=C(O1)C(=O)C=C/C2=N\NC3=CC=C(C=C3)S(=O)(=O)NC4=CC=CC=N4)C		Ki												A						1054713			Displacement of fluorescein-labeled MS574 from recombinant human BRD4 BrD1 after 1 hr by fluorescence anisotropy assay												Bromodomain-containing protein 4
76320773	CC1=C/C(=N/NC2=CC=C(C=C2)S(=O)(=O)NC3=CC=CC=N3)/C=CC1=O		Ki									6.43	5.19179		A						1054713			Displacement of fluorescein-labeled MS574 from recombinant human BRD4 BrD1 after 1 hr by fluorescence anisotropy assay												Bromodomain-containing protein 4
76324430	CC1=N/C(=N\NC2=CC=C(C=C2)S(=O)(=O)NC3=CC=CC=N3)/C(=C(C1=O)CN)CO		Ki												N						1054713			Displacement of fluorescein-labeled MS574 from recombinant human BRD4 BrD1 after 1 hr by fluorescence anisotropy assay												Bromodomain-containing protein 4
76324431	C1=CC=NC(=C1)NS(=O)(=O)C2=CC=C(C=C2)N/N=C/3\C=CC(=O)C(=C3)C(F)(F)F		Ki									9.45	5.02457		A						1054713			Displacement of fluorescein-labeled MS574 from recombinant human BRD4 BrD1 after 1 hr by fluorescence anisotropy assay												Bromodomain-containing protein 4
76327986	C1=CC=NC(=C1)NS(=O)(=O)C2=CC=C(C=C2)N/N=C/3\C=CC(=O)C(=C3)Br		Ki									4.67	5.33068		A						1054713			Displacement of fluorescein-labeled MS574 from recombinant human BRD4 BrD1 after 1 hr by fluorescence anisotropy assay												Bromodomain-containing protein 4
76328466	COc1ccc(cc1)S(=O)(=O)Nc2cc(ccc2N3CCN(C)CC3)c4nn5c(C)nnc5c6ccccc46	13891652	IC50						=	5011.87	nM		5.3		A			BAO_0000190	UO_0000065	http://www.openphacts.org/units/Nanomolar	1287025	CHEMBL3111336	B	Displacement of H4Ac4 peptide from BRD4 bromodomain-1 (unknown origin) by AlphaScreen assay	1	Scientific Literature	Homo sapiens		9606	Autocuration	BAO_0000357	103454	CHEMBL1163125	SINGLE PROTEIN	O60885	Bromodomain-containing protein 4	Homo sapiens	9	Protein			76683	CHEMBL3108763	24313754	J. Med. Chem.	2014	57	2	462
76331638	C1=CC=NC(=C1)NS(=O)(=O)C2=CC=C(C=C2)N/N=C/3\C=CC(=O)C(=C3)Cl		Ki									1.3	5.88606		A						1054713			Displacement of fluorescein-labeled MS574 from recombinant human BRD4 BrD1 after 1 hr by fluorescence anisotropy assay												Bromodomain-containing protein 4
76331639	CC1=C/C(=N\NC2=CC=C(C=C2)S(=O)(=O)NC3=CC=CC=N3)/C(=C(C1=O)Cl)N		Ki									0.17	6.76955		A						1054713			Displacement of fluorescein-labeled MS574 from recombinant human BRD4 BrD1 after 1 hr by fluorescence anisotropy assay												Bromodomain-containing protein 4
76331640	CC1=C(/C(=N/NC2=CC=C(C=C2)S(=O)(=O)NC3=CC=CC=N3)/N=C(C1=O)C)C		Ki									6.02	5.2204		A						1054713			Displacement of fluorescein-labeled MS574 from recombinant human BRD4 BrD1 after 1 hr by fluorescence anisotropy assay												Bromodomain-containing protein 4
76331651	CC1=C/C(=N\NC2=CC=C(C=C2)S(=O)(=O)NC3=CC=CC=N3)/C=C(C1=O)Br		Ki									2.79	5.5544		A						1054713			Displacement of fluorescein-labeled MS574 from recombinant human BRD4 BrD1 after 1 hr by fluorescence anisotropy assay												Bromodomain-containing protein 4
76335262	CC1=C/C(=N\NC2=CC=C(C=C2)S(=O)(=O)NC3=CC=CC=N3)/C=C(C1=O)Cl		Ki									1.4	5.85387		A						1054713			Displacement of fluorescein-labeled MS574 from recombinant human BRD4 BrD1 after 1 hr by fluorescence anisotropy assay												Bromodomain-containing protein 4
76335637	Cc1nnc2c3ccccc3c(nn12)c4ccc(N5CCOCC5)c(NS(=O)(=O)c6ccc(Cl)cc6)c4	13891637	IC50						=	1000	nM		6		A			BAO_0000190	UO_0000065	http://www.openphacts.org/units/Nanomolar	1287025	CHEMBL3111336	B	Displacement of H4Ac4 peptide from BRD4 bromodomain-1 (unknown origin) by AlphaScreen assay	1	Scientific Literature	Homo sapiens		9606	Autocuration	BAO_0000357	103454	CHEMBL1163125	SINGLE PROTEIN	O60885	Bromodomain-containing protein 4	Homo sapiens	9	Protein			76683	CHEMBL3108763	24313754	J. Med. Chem.	2014	57	2	462
90667393	Cc1onc(C)c1c2ccc3c(c2)nc(C)n3Cc4ccc(O)cc4	14527076	IC50						=	1995.26	nM		5.7		A			BAO_0000190	UO_0000065	http://www.openphacts.org/units/Nanomolar	1327497	CHEMBL3226597	B	Inhibition of BRD4 bromodomain-1 (unknown origin) by AlphaScreen assay	1	Scientific Literature	Homo sapiens		9606	Autocuration	BAO_0000357	103454	CHEMBL1163125	SINGLE PROTEIN	O60885	Bromodomain-containing protein 4	Homo sapiens	9	Protein			81949	CHEMBL3217564		MedChemComm	2013	4	1	140
90667394	COc1ccc(Cn2c(C)nc3ccc(cc23)c4c(C)onc4C)cc1	14527073	IC50						=	1584.89	nM		5.8		A			BAO_0000190	UO_0000065	http://www.openphacts.org/units/Nanomolar	1327497	CHEMBL3226597	B	Inhibition of BRD4 bromodomain-1 (unknown origin) by AlphaScreen assay	1	Scientific Literature	Homo sapiens		9606	Autocuration	BAO_0000357	103454	CHEMBL1163125	SINGLE PROTEIN	O60885	Bromodomain-containing protein 4	Homo sapiens	9	Protein			81949	CHEMBL3217564		MedChemComm	2013	4	1	140
90667395	Cc1onc(C)c1c2ccc3CCC(=O)c3c2	14527101	IC50						=	63095.7	nM		4.2		N			BAO_0000190	UO_0000065	http://www.openphacts.org/units/Nanomolar	1327497	CHEMBL3226597	B	Inhibition of BRD4 bromodomain-1 (unknown origin) by AlphaScreen assay	1	Scientific Literature	Homo sapiens		9606	Autocuration	BAO_0000357	103454	CHEMBL1163125	SINGLE PROTEIN	O60885	Bromodomain-containing protein 4	Homo sapiens	9	Protein			81949	CHEMBL3217564		MedChemComm	2013	4	1	140
90667396	Cc1onc(C)c1c2ccc3cc[nH]c3c2	14527098	IC50						=	19952.6	nM		4.7		N			BAO_0000190	UO_0000065	http://www.openphacts.org/units/Nanomolar	1327497	CHEMBL3226597	B	Inhibition of BRD4 bromodomain-1 (unknown origin) by AlphaScreen assay	1	Scientific Literature	Homo sapiens		9606	Autocuration	BAO_0000357	103454	CHEMBL1163125	SINGLE PROTEIN	O60885	Bromodomain-containing protein 4	Homo sapiens	9	Protein			81949	CHEMBL3217564		MedChemComm	2013	4	1	140
90667397	Cc1onc(C)c1c2ccc3nc[nH]c3c2	14527088	IC50						=	6309.57	nM		5.2		A			BAO_0000190	UO_0000065	http://www.openphacts.org/units/Nanomolar	1327497	CHEMBL3226597	B	Inhibition of BRD4 bromodomain-1 (unknown origin) by AlphaScreen assay	1	Scientific Literature	Homo sapiens		9606	Autocuration	BAO_0000357	103454	CHEMBL1163125	SINGLE PROTEIN	O60885	Bromodomain-containing protein 4	Homo sapiens	9	Protein			81949	CHEMBL3217564		MedChemComm	2013	4	1	140
90667398	Cc1onc(C)c1c2ccc3CCC(OCc4ccccc4)c3c2	14527100	IC50						=	31622.8	nM		4.5		N			BAO_0000190	UO_0000065	http://www.openphacts.org/units/Nanomolar	1327497	CHEMBL3226597	B	Inhibition of BRD4 bromodomain-1 (unknown origin) by AlphaScreen assay	1	Scientific Literature	Homo sapiens		9606	Autocuration	BAO_0000357	103454	CHEMBL1163125	SINGLE PROTEIN	O60885	Bromodomain-containing protein 4	Homo sapiens	9	Protein			81949	CHEMBL3217564		MedChemComm	2013	4	1	140
90667399	Cc1onc(C)c1c2ccc3CCC(OCc4ccc5ccccc5n4)c3c2	14527097	IC50						=	19952.6	nM		4.7		N			BAO_0000190	UO_0000065	http://www.openphacts.org/units/Nanomolar	1327497	CHEMBL3226597	B	Inhibition of BRD4 bromodomain-1 (unknown origin) by AlphaScreen assay	1	Scientific Literature	Homo sapiens		9606	Autocuration	BAO_0000357	103454	CHEMBL1163125	SINGLE PROTEIN	O60885	Bromodomain-containing protein 4	Homo sapiens	9	Protein			81949	CHEMBL3217564		MedChemComm	2013	4	1	140
90667400	Cc1onc(C)c1c2ccc3CCC(OCCCN4CCCC4)c3c2	14527087	IC50						=	6309.57	nM		5.2		A			BAO_0000190	UO_0000065	http://www.openphacts.org/units/Nanomolar	1327497	CHEMBL3226597	B	Inhibition of BRD4 bromodomain-1 (unknown origin) by AlphaScreen assay	1	Scientific Literature	Homo sapiens		9606	Autocuration	BAO_0000357	103454	CHEMBL1163125	SINGLE PROTEIN	O60885	Bromodomain-containing protein 4	Homo sapiens	9	Protein			81949	CHEMBL3217564		MedChemComm	2013	4	1	140
90667401	Cc1onc(C)c1c2ccc3CCC(OCCCN4CCCCC4)c3c2	14527086	IC50						=	6309.57	nM		5.2		A			BAO_0000190	UO_0000065	http://www.openphacts.org/units/Nanomolar	1327497	CHEMBL3226597	B	Inhibition of BRD4 bromodomain-1 (unknown origin) by AlphaScreen assay	1	Scientific Literature	Homo sapiens		9606	Autocuration	BAO_0000357	103454	CHEMBL1163125	SINGLE PROTEIN	O60885	Bromodomain-containing protein 4	Homo sapiens	9	Protein			81949	CHEMBL3217564		MedChemComm	2013	4	1	140
90667402	Cc1onc(C)c1c2ccc3CCC(OCCCN4CCOCC4)c3c2	14527085	IC50						=	6309.57	nM		5.2		A			BAO_0000190	UO_0000065	http://www.openphacts.org/units/Nanomolar	1327497	CHEMBL3226597	B	Inhibition of BRD4 bromodomain-1 (unknown origin) by AlphaScreen assay	1	Scientific Literature	Homo sapiens		9606	Autocuration	BAO_0000357	103454	CHEMBL1163125	SINGLE PROTEIN	O60885	Bromodomain-containing protein 4	Homo sapiens	9	Protein			81949	CHEMBL3217564		MedChemComm	2013	4	1	140
90667403	Cc1onc(C)c1c2ccc3CCC(OCCCN4CCNCC4)c3c2	14527082	IC50						=	3981.07	nM		5.4		A			BAO_0000190	UO_0000065	http://www.openphacts.org/units/Nanomolar	1327497	CHEMBL3226597	B	Inhibition of BRD4 bromodomain-1 (unknown origin) by AlphaScreen assay	1	Scientific Literature	Homo sapiens		9606	Autocuration	BAO_0000357	103454	CHEMBL1163125	SINGLE PROTEIN	O60885	Bromodomain-containing protein 4	Homo sapiens	9	Protein			81949	CHEMBL3217564		MedChemComm	2013	4	1	140
90667404	Cc1onc(C)c1c2ccc3ncn(Cc4cccc(F)c4)c3c2	14527062	IC50						=	630.96	nM		6.2		A			BAO_0000190	UO_0000065	http://www.openphacts.org/units/Nanomolar	1327497	CHEMBL3226597	B	Inhibition of BRD4 bromodomain-1 (unknown origin) by AlphaScreen assay	1	Scientific Literature	Homo sapiens		9606	Autocuration	BAO_0000357	103454	CHEMBL1163125	SINGLE PROTEIN	O60885	Bromodomain-containing protein 4	Homo sapiens	9	Protein			81949	CHEMBL3217564		MedChemComm	2013	4	1	140
90667405	Cc1onc(C)c1c2ccc3ncn(Cc4cccc(Cl)c4)c3c2	14527071	IC50						=	1258.93	nM		5.9		A			BAO_0000190	UO_0000065	http://www.openphacts.org/units/Nanomolar	1327497	CHEMBL3226597	B	Inhibition of BRD4 bromodomain-1 (unknown origin) by AlphaScreen assay	1	Scientific Literature	Homo sapiens		9606	Autocuration	BAO_0000357	103454	CHEMBL1163125	SINGLE PROTEIN	O60885	Bromodomain-containing protein 4	Homo sapiens	9	Protein			81949	CHEMBL3217564		MedChemComm	2013	4	1	140
90667406	Cc1onc(C)c1c2ccc3ncn(Cc4ccc(Cl)cc4)c3c2	14527065	IC50						=	794.33	nM		6.1		A			BAO_0000190	UO_0000065	http://www.openphacts.org/units/Nanomolar	1327497	CHEMBL3226597	B	Inhibition of BRD4 bromodomain-1 (unknown origin) by AlphaScreen assay	1	Scientific Literature	Homo sapiens		9606	Autocuration	BAO_0000357	103454	CHEMBL1163125	SINGLE PROTEIN	O60885	Bromodomain-containing protein 4	Homo sapiens	9	Protein			81949	CHEMBL3217564		MedChemComm	2013	4	1	140
90667407	Cc1onc(C)c1c2ccc3ncn(Cc4cccc(Br)c4)c3c2	14527067	IC50						=	1000	nM		6		A			BAO_0000190	UO_0000065	http://www.openphacts.org/units/Nanomolar	1327497	CHEMBL3226597	B	Inhibition of BRD4 bromodomain-1 (unknown origin) by AlphaScreen assay	1	Scientific Literature	Homo sapiens		9606	Autocuration	BAO_0000357	103454	CHEMBL1163125	SINGLE PROTEIN	O60885	Bromodomain-containing protein 4	Homo sapiens	9	Protein			81949	CHEMBL3217564		MedChemComm	2013	4	1	140
90667408	Cc1onc(C)c1c2ccc3c(c2)ncn3Cc4cccc(Br)c4	14527074	IC50						=	1584.89	nM		5.8		A			BAO_0000190	UO_0000065	http://www.openphacts.org/units/Nanomolar	1327497	CHEMBL3226597	B	Inhibition of BRD4 bromodomain-1 (unknown origin) by AlphaScreen assay	1	Scientific Literature	Homo sapiens		9606	Autocuration	BAO_0000357	103454	CHEMBL1163125	SINGLE PROTEIN	O60885	Bromodomain-containing protein 4	Homo sapiens	9	Protein			81949	CHEMBL3217564		MedChemComm	2013	4	1	140
90667409	COc1ccc(Cn2cnc3ccc(cc23)c4c(C)onc4C)cc1	14527064	IC50						=	794.33	nM		6.1		A			BAO_0000190	UO_0000065	http://www.openphacts.org/units/Nanomolar	1327497	CHEMBL3226597	B	Inhibition of BRD4 bromodomain-1 (unknown origin) by AlphaScreen assay	1	Scientific Literature	Homo sapiens		9606	Autocuration	BAO_0000357	103454	CHEMBL1163125	SINGLE PROTEIN	O60885	Bromodomain-containing protein 4	Homo sapiens	9	Protein			81949	CHEMBL3217564		MedChemComm	2013	4	1	140
90667410	Cc1onc(C)c1c2ccc3ncn(Cc4ccccc4Cl)c3c2	14527063	IC50						=	794.33	nM		6.1		A			BAO_0000190	UO_0000065	http://www.openphacts.org/units/Nanomolar	1327497	CHEMBL3226597	B	Inhibition of BRD4 bromodomain-1 (unknown origin) by AlphaScreen assay	1	Scientific Literature	Homo sapiens		9606	Autocuration	BAO_0000357	103454	CHEMBL1163125	SINGLE PROTEIN	O60885	Bromodomain-containing protein 4	Homo sapiens	9	Protein			81949	CHEMBL3217564		MedChemComm	2013	4	1	140
90667411	Cc1onc(C)c1c2ccc3ncn(Cc4ccccc4[N+](=O)[O-])c3c2	14527061	IC50						=	630.96	nM		6.2		A			BAO_0000190	UO_0000065	http://www.openphacts.org/units/Nanomolar	1327497	CHEMBL3226597	B	Inhibition of BRD4 bromodomain-1 (unknown origin) by AlphaScreen assay	1	Scientific Literature	Homo sapiens		9606	Autocuration	BAO_0000357	103454	CHEMBL1163125	SINGLE PROTEIN	O60885	Bromodomain-containing protein 4	Homo sapiens	9	Protein			81949	CHEMBL3217564		MedChemComm	2013	4	1	140
90667412	Cc1onc(C)c1c2ccc3c(c2)ncn3Cc4ccccc4[N+](=O)[O-]	14527093	IC50						=	12589.2	nM		4.9		N			BAO_0000190	UO_0000065	http://www.openphacts.org/units/Nanomolar	1327497	CHEMBL3226597	B	Inhibition of BRD4 bromodomain-1 (unknown origin) by AlphaScreen assay	1	Scientific Literature	Homo sapiens		9606	Autocuration	BAO_0000357	103454	CHEMBL1163125	SINGLE PROTEIN	O60885	Bromodomain-containing protein 4	Homo sapiens	9	Protein			81949	CHEMBL3217564		MedChemComm	2013	4	1	140
90667413	Cc1onc(C)c1c2ccc3ncn(Cc4ccccc4C#N)c3c2	14527066	IC50						=	1000	nM		6		A			BAO_0000190	UO_0000065	http://www.openphacts.org/units/Nanomolar	1327497	CHEMBL3226597	B	Inhibition of BRD4 bromodomain-1 (unknown origin) by AlphaScreen assay	1	Scientific Literature	Homo sapiens		9606	Autocuration	BAO_0000357	103454	CHEMBL1163125	SINGLE PROTEIN	O60885	Bromodomain-containing protein 4	Homo sapiens	9	Protein			81949	CHEMBL3217564		MedChemComm	2013	4	1	140
90667414	Cc1onc(C)c1c2ccc3ncn(Cc4ccc(Cl)c(Cl)c4)c3c2	14527081	IC50						=	3981.07	nM		5.4		A			BAO_0000190	UO_0000065	http://www.openphacts.org/units/Nanomolar	1327497	CHEMBL3226597	B	Inhibition of BRD4 bromodomain-1 (unknown origin) by AlphaScreen assay	1	Scientific Literature	Homo sapiens		9606	Autocuration	BAO_0000357	103454	CHEMBL1163125	SINGLE PROTEIN	O60885	Bromodomain-containing protein 4	Homo sapiens	9	Protein			81949	CHEMBL3217564		MedChemComm	2013	4	1	140
90667415	Cc1onc(C)c1c2ccc3c(c2)ncn3Cc4ccc(Cl)c(Cl)c4	14527091	IC50						=	10000	nM		5		A			BAO_0000190	UO_0000065	http://www.openphacts.org/units/Nanomolar	1327497	CHEMBL3226597	B	Inhibition of BRD4 bromodomain-1 (unknown origin) by AlphaScreen assay	1	Scientific Literature	Homo sapiens		9606	Autocuration	BAO_0000357	103454	CHEMBL1163125	SINGLE PROTEIN	O60885	Bromodomain-containing protein 4	Homo sapiens	9	Protein			81949	CHEMBL3217564		MedChemComm	2013	4	1	140
90667416	COC(=O)c1ccc(Cn2cnc3ccc(cc23)c4c(C)onc4C)cc1	14527070	IC50						=	1258.93	nM		5.9		A			BAO_0000190	UO_0000065	http://www.openphacts.org/units/Nanomolar	1327497	CHEMBL3226597	B	Inhibition of BRD4 bromodomain-1 (unknown origin) by AlphaScreen assay	1	Scientific Literature	Homo sapiens		9606	Autocuration	BAO_0000357	103454	CHEMBL1163125	SINGLE PROTEIN	O60885	Bromodomain-containing protein 4	Homo sapiens	9	Protein			81949	CHEMBL3217564		MedChemComm	2013	4	1	140
90667417	CN(C)C(=O)c1cccc(Cn2cnc3ccc(cc23)c4c(C)onc4C)c1	14527060	IC50						=	630.96	nM		6.2		A			BAO_0000190	UO_0000065	http://www.openphacts.org/units/Nanomolar	1327497	CHEMBL3226597	B	Inhibition of BRD4 bromodomain-1 (unknown origin) by AlphaScreen assay	1	Scientific Literature	Homo sapiens		9606	Autocuration	BAO_0000357	103454	CHEMBL1163125	SINGLE PROTEIN	O60885	Bromodomain-containing protein 4	Homo sapiens	9	Protein			81949	CHEMBL3217564		MedChemComm	2013	4	1	140
90667418	CN(C)C(=O)c1ccc(Cn2cnc3ccc(cc23)c4c(C)onc4C)cc1	14527077	IC50						=	1995.26	nM		5.7		A			BAO_0000190	UO_0000065	http://www.openphacts.org/units/Nanomolar	1327497	CHEMBL3226597	B	Inhibition of BRD4 bromodomain-1 (unknown origin) by AlphaScreen assay	1	Scientific Literature	Homo sapiens		9606	Autocuration	BAO_0000357	103454	CHEMBL1163125	SINGLE PROTEIN	O60885	Bromodomain-containing protein 4	Homo sapiens	9	Protein			81949	CHEMBL3217564		MedChemComm	2013	4	1	140
90667452	CC(C)OC(=O)N[C@@H]1C[C@H](C)N(C(=O)C)c2ccc(cc12)c3ccc(NC(=O)CCCCCCC(=O)NO)cc3	14529908	IC50						=	50	nM		7.3		A			BAO_0000190	UO_0000065	http://www.openphacts.org/units/Nanomolar	1329054	CHEMBL3224040	B	Inhibition of recombinant BRD4 bromodomain 1 (unknown origin) using histone H4 peptide as substrate incubated for 1 hr under dark condition by HTRF assay	1	Scientific Literature	Homo sapiens		9606	Autocuration	BAO_0000357	103454	CHEMBL1163125	SINGLE PROTEIN	O60885	Bromodomain-containing protein 4	Homo sapiens	9	Protein			82037	CHEMBL3217474		MedChemComm	2014	5	3	342
90667453	CC(C)OC(=O)N[C@@H]1C[C@H](C)N(C(=O)C)c2ccc(NC(=O)CCCCCCC(=O)NO)cc12	14529909	IC50						=	290	nM		6.54		A			BAO_0000190	UO_0000065	http://www.openphacts.org/units/Nanomolar	1329054	CHEMBL3224040	B	Inhibition of recombinant BRD4 bromodomain 1 (unknown origin) using histone H4 peptide as substrate incubated for 1 hr under dark condition by HTRF assay	1	Scientific Literature	Homo sapiens		9606	Autocuration	BAO_0000357	103454	CHEMBL1163125	SINGLE PROTEIN	O60885	Bromodomain-containing protein 4	Homo sapiens	9	Protein			82037	CHEMBL3217474		MedChemComm	2014	5	3	342
90667454	C[C@H]1C[C@@H](NC(=O)CCCCCCC(=O)NO)c2cc(ccc2N1C(=O)C)c3ccccc3	14529910	IC50						=	360	nM		6.44		A			BAO_0000190	UO_0000065	http://www.openphacts.org/units/Nanomolar	1329054	CHEMBL3224040	B	Inhibition of recombinant BRD4 bromodomain 1 (unknown origin) using histone H4 peptide as substrate incubated for 1 hr under dark condition by HTRF assay	1	Scientific Literature	Homo sapiens		9606	Autocuration	BAO_0000357	103454	CHEMBL1163125	SINGLE PROTEIN	O60885	Bromodomain-containing protein 4	Homo sapiens	9	Protein			82037	CHEMBL3217474		MedChemComm	2014	5	3	342
90667455	C[C@H]1C[C@@H](Nc2ccccc2)c3cc(NC(=O)CCCCCCC(=O)NO)ccc3N1C(=O)C	14529911	IC50						=	100	nM		7		A			BAO_0000190	UO_0000065	http://www.openphacts.org/units/Nanomolar	1329054	CHEMBL3224040	B	Inhibition of recombinant BRD4 bromodomain 1 (unknown origin) using histone H4 peptide as substrate incubated for 1 hr under dark condition by HTRF assay	1	Scientific Literature	Homo sapiens		9606	Autocuration	BAO_0000357	103454	CHEMBL1163125	SINGLE PROTEIN	O60885	Bromodomain-containing protein 4	Homo sapiens	9	Protein			82037	CHEMBL3217474		MedChemComm	2014	5	3	342
A470	Cc1cc(N=Nc2ccc(cc2)S(=O)(=O)Nc3ccccn3)c(N)cc1O	13826915	Ki						=	85.11	nM		7.07002		A			BAO_0000192	UO_0000065	http://www.openphacts.org/units/Nanomolar	1277432	CHEMBL3089622	B	Displacement of fluorescein-labeled MS574 from recombinant human BRD4 BrD1 after 1 hr by fluorescence anisotropy assay	1	Scientific Literature	Homo sapiens		9606	Autocuration	BAO_0000357	103454	CHEMBL1163125	SINGLE PROTEIN	O60885	Bromodomain-containing protein 4	Homo sapiens	9	Protein			76008	CHEMBL3085768	24144283	J. Med. Chem.	2013	56	22	9251
A669	Cc1cc(N=Nc2cc(c(C)cc2C)S(=O)(=O)O)c(N)cc1O	13826157	Ki						=	10850	nM		4.96457		N			BAO_0000192	UO_0000065	http://www.openphacts.org/units/Nanomolar	1277432	CHEMBL3089622	B	Displacement of fluorescein-labeled MS574 from recombinant human BRD4 BrD1 after 1 hr by fluorescence anisotropy assay	1	Scientific Literature	Homo sapiens		9606	Autocuration	BAO_0000357	103454	CHEMBL1163125	SINGLE PROTEIN	O60885	Bromodomain-containing protein 4	Homo sapiens	9	Protein			76008	CHEMBL3085768	24144283	J. Med. Chem.	2013	56	22	9251
A841	CC(C)Cc1nc(C2=CNC(=O)C(=C2)Cl)n(n1)c3cccc4OCCOc34	13477941	IC50						=	77000	nM		4.11351		N			BAO_0000190	UO_0000065	http://www.openphacts.org/units/Nanomolar	988295	CHEMBL2439861	B	Inhibition of His-tagged first bromodomain of BRD4 (unknown origin) using H-SGRGK(Ac)GGK(Ac)GLGK-(Ac)GGAK(Ac)RHRK(Biotin)-OH as substrate preincubated for 30 mins prior to substrate addition measured after 30 mins by AlphaScreen assay	1	Scientific Literature	Homo sapiens		9606	Autocuration	BAO_0000357	103454	CHEMBL1163125	SINGLE PROTEIN	O60885	Bromodomain-containing protein 4	Homo sapiens	9	Protein			75196	CHEMBL2434916	24090311	J. Med. Chem.	2013	56	20	8073
13785514	C1=CC=NC(=C1)NS(=O)(=O)C2=CC=C(C=C2)NN=C3C=C(C(=O)C(=C3)Br)Br		Ki									4.29	5.36754		A						1054712			Displacement of fluorescein-labeled MS574 from recombinant human BRD4 BrD2 after 1 hr by fluorescence anisotropy assay												Bromodomain-containing protein 4
46907787	Cc1sc2c(C(=N[C@@H](CC(=O)OC(C)(C)C)c3nnc(C)n23)c4ccc(Cl)cc4)c1C	8046392	IC50						=	33	nM		7.48		A		1	BAO_0000190	UO_0000065	http://www.openphacts.org/units/Nanomolar	807447	CHEMBL1958569	B	Displacement of acetylated histone peptide from BRD4-BD2 by luminescence proximity homogenous assay	1	Scientific Literature				Autocuration	BAO_0000357	103454	CHEMBL1163125	SINGLE PROTEIN	O60885	Bromodomain-containing protein 4	Homo sapiens	8	Homologous protein			61257	CHEMBL1955852	22316554	Bioorg. Med. Chem.	2012	20	6	1887
49837845	CC1=CC(=C(C=C1N/N=C/2\C=C(C(=O)C=C2N)C)S(=O)(=O)O)C		Ki									19.74	4.70465	4.70465	N						1054712			Displacement of fluorescein-labeled MS574 from recombinant human BRD4 BrD2 after 1 hr by fluorescence anisotropy assay												Bromodomain-containing protein 4
60171223	CC1=CC(=NNC2=CC=C(C=C2)S(=O)(=O)NC3=CC=C(C=C3)OC)C=C(C1=O)C		Ki									6.59	5.18111		A						1054712			Displacement of fluorescein-labeled MS574 from recombinant human BRD4 BrD2 after 1 hr by fluorescence anisotropy assay												Bromodomain-containing protein 4
60171339	CC(C)C1=CC(=NNC2=CC=C(C=C2)S(=O)(=O)NC3=CC=CC=N3)C=C(C1=O)C(C)C		Ki												N						1054712			Displacement of fluorescein-labeled MS574 from recombinant human BRD4 BrD2 after 1 hr by fluorescence anisotropy assay												Bromodomain-containing protein 4
60171341	C1=CC=NC(=C1)NS(=O)(=O)C2=CC=C(C=C2)NN=C3C=C(C(=O)C(=C3)Cl)Cl		Ki									4.89	5.31069		A						1054712			Displacement of fluorescein-labeled MS574 from recombinant human BRD4 BrD2 after 1 hr by fluorescence anisotropy assay												Bromodomain-containing protein 4
60171456	CC1=CC(=NNC2=CC=C(C=C2)S(=O)(=O)NC3=NC=C(C=C3)OC)C=C(C1=O)C		Ki									2.23	5.6517		A						1054712			Displacement of fluorescein-labeled MS574 from recombinant human BRD4 BrD2 after 1 hr by fluorescence anisotropy assay												Bromodomain-containing protein 4
60171583	CC1=CC(=NNC2=CC=C(C=C2)S(=O)(=O)NC3=CC=C(C=C3)C(F)(F)F)C=C(C1=O)C		Ki									7.14	5.1463		A						1054712			Displacement of fluorescein-labeled MS574 from recombinant human BRD4 BrD2 after 1 hr by fluorescence anisotropy assay												Bromodomain-containing protein 4
60171584	CC1=CC(=NNC2=CC=C(C=C2)S(=O)(=O)NC3=CC=CC=N3)C=C(C1=O)C		Ki									4.3	5.36653		A						1054712			Displacement of fluorescein-labeled MS574 from recombinant human BRD4 BrD2 after 1 hr by fluorescence anisotropy assay												Bromodomain-containing protein 4
72735067	CC1=CC(=C(C=C1NN=C2C=C(C(=O)C(=C2)C)C)S(=O)(=O)O)C		Ki									6.37	5.19586		A						1054712			Displacement of fluorescein-labeled MS574 from recombinant human BRD4 BrD2 after 1 hr by fluorescence anisotropy assay												Bromodomain-containing protein 4
72735068	CC1=CC(=NNC2=CC(=CC=C2)S(=O)(=O)NC3=CC=CC=N3)C=C(C1=O)C		Ki									40.36	4.39405	4.39405	N						1054712			Displacement of fluorescein-labeled MS574 from recombinant human BRD4 BrD2 after 1 hr by fluorescence anisotropy assay												Bromodomain-containing protein 4
72735069	CC1=CC(=NNC2=CC=C(C=C2)S(=O)(=O)NCC3=CC=C(C=C3)C(F)(F)F)C=C(C1=O)C		Ki									100	4	4	N						1054712			Displacement of fluorescein-labeled MS574 from recombinant human BRD4 BrD2 after 1 hr by fluorescence anisotropy assay												Bromodomain-containing protein 4
72735070	CC1=CC(=NNC2=CC=C(C=C2)S(=O)(=O)N(C)C3=CC=CC=N3)C=C(C1=O)C		Ki									7.12	5.14752		A						1054712			Displacement of fluorescein-labeled MS574 from recombinant human BRD4 BrD2 after 1 hr by fluorescence anisotropy assay												Bromodomain-containing protein 4
72735071	CC1=CC(=NNC2=CC=C(C=C2)S(=O)(=O)NC3=CC=CC(=C3)C(F)(F)F)C=C(C1=O)C		Ki									7.77	5.10958		A						1054712			Displacement of fluorescein-labeled MS574 from recombinant human BRD4 BrD2 after 1 hr by fluorescence anisotropy assay												Bromodomain-containing protein 4
72735072	CC1=CC(=NNC2=CC=C(C=C2)S(=O)(=O)NC3=NC=CC(=C3)Cl)C=C(C1=O)C		Ki									5.92	5.22768		A						1054712			Displacement of fluorescein-labeled MS574 from recombinant human BRD4 BrD2 after 1 hr by fluorescence anisotropy assay												Bromodomain-containing protein 4
72735256	CC1=CC(=NNC2=CC=C(C=C2)S(=O)(=O)NC3=NC=C(C=C3)C(=O)O)C=C(C1=O)C		Ki									1.38	5.86012		A						1054712			Displacement of fluorescein-labeled MS574 from recombinant human BRD4 BrD2 after 1 hr by fluorescence anisotropy assay												Bromodomain-containing protein 4
72735257	CC1=CC(=NNC2=CC=C(C=C2)S(=O)(=O)NC3=NC=C(C=C3)Cl)C=C(C1=O)C		Ki									5.84	5.23359		A						1054712			Displacement of fluorescein-labeled MS574 from recombinant human BRD4 BrD2 after 1 hr by fluorescence anisotropy assay												Bromodomain-containing protein 4
72735258	CC1=CC(=NNC2=CC=C(C=C2)S(=O)(=O)NC3=NC=C(C=C3)Br)C=C(C1=O)C		Ki									38.7	4.41229	4.41229	N						1054712			Displacement of fluorescein-labeled MS574 from recombinant human BRD4 BrD2 after 1 hr by fluorescence anisotropy assay												Bromodomain-containing protein 4
72735259	CC1=CC(=NNC2=CC=C(C=C2)S(=O)(=O)NC3=CC=C(C=C3)C(=O)N)C=C(C1=O)C		Ki									12.2	4.91364	4.91364	N						1054712			Displacement of fluorescein-labeled MS574 from recombinant human BRD4 BrD2 after 1 hr by fluorescence anisotropy assay												Bromodomain-containing protein 4
72735260	CC1=CC(=NNC2=CC=C(C=C2)S(=O)(=O)NC3=NC=C(C=C3)F)C=C(C1=O)C		Ki									3.44	5.46344		A						1054712			Displacement of fluorescein-labeled MS574 from recombinant human BRD4 BrD2 after 1 hr by fluorescence anisotropy assay												Bromodomain-containing protein 4
72735261	CC1=CC(=NNC2=CC=C(C=C2)S(=O)(=O)NC3=CC=C(C=C3)F)C=C(C1=O)C		Ki									8.87	5.05208		A						1054712			Displacement of fluorescein-labeled MS574 from recombinant human BRD4 BrD2 after 1 hr by fluorescence anisotropy assay												Bromodomain-containing protein 4
72735429	CC1=CC(=NNC2=CC(=C(C=C2)S(=O)(=O)NC3=CC=CC=N3)OC)C=C(C1=O)C		Ki									7.77	5.10958		A						1054712			Displacement of fluorescein-labeled MS574 from recombinant human BRD4 BrD2 after 1 hr by fluorescence anisotropy assay												Bromodomain-containing protein 4
72735434	CC1=CC(=CC(=O)C1=O)NNC2=CC=C(C=C2)S(=O)(=O)NC3=CC=CC=N3		Ki									3.27	5.48545		A						1054712			Displacement of fluorescein-labeled MS574 from recombinant human BRD4 BrD2 after 1 hr by fluorescence anisotropy assay												Bromodomain-containing protein 4
72735435	C1=CC=NC(=C1)NS(=O)(=O)C2=CC=C(C=C2)NNC3=CC(=O)C(=O)C=C3		Ki									3.91	5.40782		A						1054712			Displacement of fluorescein-labeled MS574 from recombinant human BRD4 BrD2 after 1 hr by fluorescence anisotropy assay												Bromodomain-containing protein 4
72735611	CC1=CC(=CC(=C1OC)C)N=NC2=CC=C(C=C2)S(=O)(=O)NC3=CC=CC=N3		Ki												N						1054712			Displacement of fluorescein-labeled MS574 from recombinant human BRD4 BrD2 after 1 hr by fluorescence anisotropy assay												Bromodomain-containing protein 4
72735612	CC1=CC(=CC(=C1NC(=O)C)C)N=NC2=CC=C(C=C2)S(=O)(=O)NC3=CC=CC=N3		Ki												N						1054712			Displacement of fluorescein-labeled MS574 from recombinant human BRD4 BrD2 after 1 hr by fluorescence anisotropy assay												Bromodomain-containing protein 4
72735613	CC(C)(C)C1=CC(=NNC2=CC=C(C=C2)S(=O)(=O)NC3=CC=CC=N3)C=C(C1=O)C(C)(C)C		Ki												N						1054712			Displacement of fluorescein-labeled MS574 from recombinant human BRD4 BrD2 after 1 hr by fluorescence anisotropy assay												Bromodomain-containing protein 4
73386670	CC1=C/C(=N\NC2=CC=C(C=C2)S(=O)(=O)NC3=CC=CC=N3)/C(=CC1=O)N		Ki									0.34	6.46852		A						1054712			Displacement of fluorescein-labeled MS574 from recombinant human BRD4 BrD2 after 1 hr by fluorescence anisotropy assay												Bromodomain-containing protein 4
73386671	CC1=C/C(=N\NC2=CC=C(C=C2)S(=O)(=O)NC3=CC=CC=N3)/C(=C(C1=O)C)N		Ki									0.44	6.35655		A						1054712			Displacement of fluorescein-labeled MS574 from recombinant human BRD4 BrD2 after 1 hr by fluorescence anisotropy assay												Bromodomain-containing protein 4
76313547	COC1=C/C(=N\NC2=CC=C(C=C2)S(=O)(=O)NC3=CC=CC=N3)/C(=CC1=O)N		Ki									5.39	5.26841		A						1054712			Displacement of fluorescein-labeled MS574 from recombinant human BRD4 BrD2 after 1 hr by fluorescence anisotropy assay												Bromodomain-containing protein 4
76313548	CC1=C/C(=N/NC2=CC=C(C=C2)S(=O)(=O)NC3=CC=CC=N3)/N=C(C1=O)C		Ki									24.6	4.60906	4.60906	N						1054712			Displacement of fluorescein-labeled MS574 from recombinant human BRD4 BrD2 after 1 hr by fluorescence anisotropy assay												Bromodomain-containing protein 4
76320773	CC1=C/C(=N/NC2=CC=C(C=C2)S(=O)(=O)NC3=CC=CC=N3)/C=CC1=O		Ki									8.2	5.08619		A						1054712			Displacement of fluorescein-labeled MS574 from recombinant human BRD4 BrD2 after 1 hr by fluorescence anisotropy assay												Bromodomain-containing protein 4
76324431	C1=CC=NC(=C1)NS(=O)(=O)C2=CC=C(C=C2)N/N=C/3\C=CC(=O)C(=C3)C(F)(F)F		Ki									6.83	5.16558		A						1054712			Displacement of fluorescein-labeled MS574 from recombinant human BRD4 BrD2 after 1 hr by fluorescence anisotropy assay												Bromodomain-containing protein 4
76327986	C1=CC=NC(=C1)NS(=O)(=O)C2=CC=C(C=C2)N/N=C/3\C=CC(=O)C(=C3)Br		Ki									4.69	5.32883		A						1054712			Displacement of fluorescein-labeled MS574 from recombinant human BRD4 BrD2 after 1 hr by fluorescence anisotropy assay												Bromodomain-containing protein 4
76331638	C1=CC=NC(=C1)NS(=O)(=O)C2=CC=C(C=C2)N/N=C/3\C=CC(=O)C(=C3)Cl		Ki									6.16	5.21042		A						1054712			Displacement of fluorescein-labeled MS574 from recombinant human BRD4 BrD2 after 1 hr by fluorescence anisotropy assay												Bromodomain-containing protein 4
76331639	CC1=C/C(=N\NC2=CC=C(C=C2)S(=O)(=O)NC3=CC=CC=N3)/C(=C(C1=O)Cl)N		Ki									0.64	6.19382		A						1054712			Displacement of fluorescein-labeled MS574 from recombinant human BRD4 BrD2 after 1 hr by fluorescence anisotropy assay												Bromodomain-containing protein 4
76331640	CC1=C(/C(=N/NC2=CC=C(C=C2)S(=O)(=O)NC3=CC=CC=N3)/N=C(C1=O)C)C		Ki									9.1	5.04096		A						1054712			Displacement of fluorescein-labeled MS574 from recombinant human BRD4 BrD2 after 1 hr by fluorescence anisotropy assay												Bromodomain-containing protein 4
76331651	CC1=C/C(=N\NC2=CC=C(C=C2)S(=O)(=O)NC3=CC=CC=N3)/C=C(C1=O)Br		Ki									4.48	5.34872		A						1054712			Displacement of fluorescein-labeled MS574 from recombinant human BRD4 BrD2 after 1 hr by fluorescence anisotropy assay												Bromodomain-containing protein 4
76335262	CC1=C/C(=N\NC2=CC=C(C=C2)S(=O)(=O)NC3=CC=CC=N3)/C=C(C1=O)Cl		Ki									4.81	5.31785		A						1054712			Displacement of fluorescein-labeled MS574 from recombinant human BRD4 BrD2 after 1 hr by fluorescence anisotropy assay												Bromodomain-containing protein 4
90667452	CC(C)OC(=O)N[C@@H]1C[C@H](C)N(C(=O)C)c2ccc(cc12)c3ccc(NC(=O)CCCCCCC(=O)NO)cc3	14529939	Kd						=	53	nM		7.28		A			BAO_0000034	UO_0000065	http://www.openphacts.org/units/Nanomolar	1329060	CHEMBL3224046	B	Inhibition of BRD4 bromodomain 2 (338 to 437) (unknown origin) by surface plasmon resonance analysis	1	Scientific Literature	Homo sapiens		9606	Autocuration	BAO_0000357	103454	CHEMBL1163125	SINGLE PROTEIN	O60885	Bromodomain-containing protein 4	Homo sapiens	9	Protein			82037	CHEMBL3217474		MedChemComm	2014	5	3	342
A470	Cc1cc(N=Nc2ccc(cc2)S(=O)(=O)Nc3ccccn3)c(N)cc1O	13826976	Ki						=	340	nM		6.46852		A			BAO_0000192	UO_0000065	http://www.openphacts.org/units/Nanomolar	1277431	CHEMBL3089621	B	Displacement of fluorescein-labeled MS574 from recombinant human BRD4 BrD2 after 1 hr by fluorescence anisotropy assay	1	Scientific Literature	Homo sapiens		9606	Autocuration	BAO_0000357	103454	CHEMBL1163125	SINGLE PROTEIN	O60885	Bromodomain-containing protein 4	Homo sapiens	9	Protein			76008	CHEMBL3085768	24144283	J. Med. Chem.	2013	56	22	9251
A419	Cc1cc(N=Nc2ccc(cc2)S(=O)(=O)Nc3ccccn3)c(N)c(C)c1O	13826975	Ki						=	440	nM		6.35655		A			BAO_0000192	UO_0000065	http://www.openphacts.org/units/Nanomolar	1277431	CHEMBL3089621	B	Displacement of fluorescein-labeled MS574 from recombinant human BRD4 BrD2 after 1 hr by fluorescence anisotropy assay	1	Scientific Literature	Homo sapiens		9606	Autocuration	BAO_0000357	103454	CHEMBL1163125	SINGLE PROTEIN	O60885	Bromodomain-containing protein 4	Homo sapiens	9	Protein			76008	CHEMBL3085768	24144283	J. Med. Chem.	2013	56	22	9251
A471	Cc1cc(N=Nc2ccc(cc2)S(=O)(=O)Nc3ccccn3)c(N)c(Cl)c1O	13826974	Ki						=	640	nM		6.19382		A			BAO_0000192	UO_0000065	http://www.openphacts.org/units/Nanomolar	1277431	CHEMBL3089621	B	Displacement of fluorescein-labeled MS574 from recombinant human BRD4 BrD2 after 1 hr by fluorescence anisotropy assay	1	Scientific Literature	Homo sapiens		9606	Autocuration	BAO_0000357	103454	CHEMBL1163125	SINGLE PROTEIN	O60885	Bromodomain-containing protein 4	Homo sapiens	9	Protein			76008	CHEMBL3085768	24144283	J. Med. Chem.	2013	56	22	9251
A197	Cc1cc(cc(C)c1O)N=Nc2ccc(cc2)S(=O)(=O)Nc3ccc(cn3)C(=O)O	13826104	Ki						=	1380	nM		5.86012		A			BAO_0000192	UO_0000065	http://www.openphacts.org/units/Nanomolar	1277431	CHEMBL3089621	B	Displacement of fluorescein-labeled MS574 from recombinant human BRD4 BrD2 after 1 hr by fluorescence anisotropy assay	1	Scientific Literature	Homo sapiens		9606	Autocuration	BAO_0000357	103454	CHEMBL1163125	SINGLE PROTEIN	O60885	Bromodomain-containing protein 4	Homo sapiens	9	Protein			76008	CHEMBL3085768	24144283	J. Med. Chem.	2013	56	22	9251
A248	COc1ccc(NS(=O)(=O)c2ccc(cc2)N=Nc3cc(C)c(O)c(C)c3)nc1	13826101	Ki						=	2230	nM		5.6517		A			BAO_0000192	UO_0000065	http://www.openphacts.org/units/Nanomolar	1277431	CHEMBL3089621	B	Displacement of fluorescein-labeled MS574 from recombinant human BRD4 BrD2 after 1 hr by fluorescence anisotropy assay	1	Scientific Literature	Homo sapiens		9606	Autocuration	BAO_0000357	103454	CHEMBL1163125	SINGLE PROTEIN	O60885	Bromodomain-containing protein 4	Homo sapiens	9	Protein			76008	CHEMBL3085768	24144283	J. Med. Chem.	2013	56	22	9251
A425	Cc1cc(cc(O)c1O)N=Nc2ccc(cc2)S(=O)(=O)Nc3ccccn3	13826970	Ki						=	3270	nM		5.48545		A			BAO_0000192	UO_0000065	http://www.openphacts.org/units/Nanomolar	1277431	CHEMBL3089621	B	Displacement of fluorescein-labeled MS574 from recombinant human BRD4 BrD2 after 1 hr by fluorescence anisotropy assay	1	Scientific Literature	Homo sapiens		9606	Autocuration	BAO_0000357	103454	CHEMBL1163125	SINGLE PROTEIN	O60885	Bromodomain-containing protein 4	Homo sapiens	9	Protein			76008	CHEMBL3085768	24144283	J. Med. Chem.	2013	56	22	9251
A361	Cc1cc(cc(C)c1O)N=Nc2ccc(cc2)S(=O)(=O)Nc3ccc(F)cn3	13826097	Ki						=	3440	nM		5.46344		A			BAO_0000192	UO_0000065	http://www.openphacts.org/units/Nanomolar	1277431	CHEMBL3089621	B	Displacement of fluorescein-labeled MS574 from recombinant human BRD4 BrD2 after 1 hr by fluorescence anisotropy assay	1	Scientific Literature	Homo sapiens		9606	Autocuration	BAO_0000357	103454	CHEMBL1163125	SINGLE PROTEIN	O60885	Bromodomain-containing protein 4	Homo sapiens	9	Protein			76008	CHEMBL3085768	24144283	J. Med. Chem.	2013	56	22	9251
A502	Oc1ccc(cc1O)N=Nc2ccc(cc2)S(=O)(=O)Nc3ccccn3	13826969	Ki						=	3910	nM		5.40782		A			BAO_0000192	UO_0000065	http://www.openphacts.org/units/Nanomolar	1277431	CHEMBL3089621	B	Displacement of fluorescein-labeled MS574 from recombinant human BRD4 BrD2 after 1 hr by fluorescence anisotropy assay	1	Scientific Literature	Homo sapiens		9606	Autocuration	BAO_0000357	103454	CHEMBL1163125	SINGLE PROTEIN	O60885	Bromodomain-containing protein 4	Homo sapiens	9	Protein			76008	CHEMBL3085768	24144283	J. Med. Chem.	2013	56	22	9251
A253	Oc1c(Br)cc(cc1Br)N=Nc2ccc(cc2)S(=O)(=O)Nc3ccccn3	13826978	Ki						=	4290	nM		5.36754		A			BAO_0000192	UO_0000065	http://www.openphacts.org/units/Nanomolar	1277431	CHEMBL3089621	B	Displacement of fluorescein-labeled MS574 from recombinant human BRD4 BrD2 after 1 hr by fluorescence anisotropy assay	1	Scientific Literature	Homo sapiens		9606	Autocuration	BAO_0000357	103454	CHEMBL1163125	SINGLE PROTEIN	O60885	Bromodomain-containing protein 4	Homo sapiens	9	Protein			76008	CHEMBL3085768	24144283	J. Med. Chem.	2013	56	22	9251
A388	Cc1cc(cc(C)c1O)N=Nc2ccc(cc2)S(=O)(=O)Nc3ccccn3	13826109	Ki						=	4300	nM		5.36653		A			BAO_0000192	UO_0000065	http://www.openphacts.org/units/Nanomolar	1277431	CHEMBL3089621	B	Displacement of fluorescein-labeled MS574 from recombinant human BRD4 BrD2 after 1 hr by fluorescence anisotropy assay	1	Scientific Literature	Homo sapiens		9606	Autocuration	BAO_0000357	103454	CHEMBL1163125	SINGLE PROTEIN	O60885	Bromodomain-containing protein 4	Homo sapiens	9	Protein			76008	CHEMBL3085768	24144283	J. Med. Chem.	2013	56	22	9251
A444	Cc1cc(cc(Br)c1O)N=Nc2ccc(cc2)S(=O)(=O)Nc3ccccn3	13826983	Ki						=	4480	nM		5.34872		A			BAO_0000192	UO_0000065	http://www.openphacts.org/units/Nanomolar	1277431	CHEMBL3089621	B	Displacement of fluorescein-labeled MS574 from recombinant human BRD4 BrD2 after 1 hr by fluorescence anisotropy assay	1	Scientific Literature	Homo sapiens		9606	Autocuration	BAO_0000357	103454	CHEMBL1163125	SINGLE PROTEIN	O60885	Bromodomain-containing protein 4	Homo sapiens	9	Protein			76008	CHEMBL3085768	24144283	J. Med. Chem.	2013	56	22	9251
A506	Oc1ccc(cc1Br)N=Nc2ccc(cc2)S(=O)(=O)Nc3ccccn3	13826981	Ki						=	4690	nM		5.32883		A			BAO_0000192	UO_0000065	http://www.openphacts.org/units/Nanomolar	1277431	CHEMBL3089621	B	Displacement of fluorescein-labeled MS574 from recombinant human BRD4 BrD2 after 1 hr by fluorescence anisotropy assay	1	Scientific Literature	Homo sapiens		9606	Autocuration	BAO_0000357	103454	CHEMBL1163125	SINGLE PROTEIN	O60885	Bromodomain-containing protein 4	Homo sapiens	9	Protein			76008	CHEMBL3085768	24144283	J. Med. Chem.	2013	56	22	9251
A366	Cc1cc(cc(Cl)c1O)N=Nc2ccc(cc2)S(=O)(=O)Nc3ccccn3	13826982	Ki						=	4810	nM		5.31785		A			BAO_0000192	UO_0000065	http://www.openphacts.org/units/Nanomolar	1277431	CHEMBL3089621	B	Displacement of fluorescein-labeled MS574 from recombinant human BRD4 BrD2 after 1 hr by fluorescence anisotropy assay	1	Scientific Literature	Homo sapiens		9606	Autocuration	BAO_0000357	103454	CHEMBL1163125	SINGLE PROTEIN	O60885	Bromodomain-containing protein 4	Homo sapiens	9	Protein			76008	CHEMBL3085768	24144283	J. Med. Chem.	2013	56	22	9251
A354	Oc1c(Cl)cc(cc1Cl)N=Nc2ccc(cc2)S(=O)(=O)Nc3ccccn3	13826984	Ki						=	4890	nM		5.31069		A			BAO_0000192	UO_0000065	http://www.openphacts.org/units/Nanomolar	1277431	CHEMBL3089621	B	Displacement of fluorescein-labeled MS574 from recombinant human BRD4 BrD2 after 1 hr by fluorescence anisotropy assay	1	Scientific Literature	Homo sapiens		9606	Autocuration	BAO_0000357	103454	CHEMBL1163125	SINGLE PROTEIN	O60885	Bromodomain-containing protein 4	Homo sapiens	9	Protein			76008	CHEMBL3085768	24144283	J. Med. Chem.	2013	56	22	9251
A357	COc1cc(N=Nc2ccc(cc2)S(=O)(=O)Nc3ccccn3)c(N)cc1O	13826973	Ki						=	5390	nM		5.26841		A			BAO_0000192	UO_0000065	http://www.openphacts.org/units/Nanomolar	1277431	CHEMBL3089621	B	Displacement of fluorescein-labeled MS574 from recombinant human BRD4 BrD2 after 1 hr by fluorescence anisotropy assay	1	Scientific Literature	Homo sapiens		9606	Autocuration	BAO_0000357	103454	CHEMBL1163125	SINGLE PROTEIN	O60885	Bromodomain-containing protein 4	Homo sapiens	9	Protein			76008	CHEMBL3085768	24144283	J. Med. Chem.	2013	56	22	9251
A280	Cc1cc(cc(C)c1O)N=Nc2ccc(cc2)S(=O)(=O)Nc3ccc(Cl)cn3	13826103	Ki						=	5840	nM		5.23359		A			BAO_0000192	UO_0000065	http://www.openphacts.org/units/Nanomolar	1277431	CHEMBL3089621	B	Displacement of fluorescein-labeled MS574 from recombinant human BRD4 BrD2 after 1 hr by fluorescence anisotropy assay	1	Scientific Literature	Homo sapiens		9606	Autocuration	BAO_0000357	103454	CHEMBL1163125	SINGLE PROTEIN	O60885	Bromodomain-containing protein 4	Homo sapiens	9	Protein			76008	CHEMBL3085768	24144283	J. Med. Chem.	2013	56	22	9251
A306	Cc1cc(cc(C)c1O)N=Nc2ccc(cc2)S(=O)(=O)Nc3cc(Cl)ccn3	13826105	Ki						=	5920	nM		5.22768		A			BAO_0000192	UO_0000065	http://www.openphacts.org/units/Nanomolar	1277431	CHEMBL3089621	B	Displacement of fluorescein-labeled MS574 from recombinant human BRD4 BrD2 after 1 hr by fluorescence anisotropy assay	1	Scientific Literature	Homo sapiens		9606	Autocuration	BAO_0000357	103454	CHEMBL1163125	SINGLE PROTEIN	O60885	Bromodomain-containing protein 4	Homo sapiens	9	Protein			76008	CHEMBL3085768	24144283	J. Med. Chem.	2013	56	22	9251
A360	Oc1ccc(cc1Cl)N=Nc2ccc(cc2)S(=O)(=O)Nc3ccccn3	13826980	Ki						=	6160	nM		5.21042		A			BAO_0000192	UO_0000065	http://www.openphacts.org/units/Nanomolar	1277431	CHEMBL3089621	B	Displacement of fluorescein-labeled MS574 from recombinant human BRD4 BrD2 after 1 hr by fluorescence anisotropy assay	1	Scientific Literature	Homo sapiens		9606	Autocuration	BAO_0000357	103454	CHEMBL1163125	SINGLE PROTEIN	O60885	Bromodomain-containing protein 4	Homo sapiens	9	Protein			76008	CHEMBL3085768	24144283	J. Med. Chem.	2013	56	22	9251
A515	Cc1cc(cc(C)c1O)N=Nc2cc(c(C)cc2C)S(=O)(=O)O	13826111	Ki						=	6370	nM		5.19586		A			BAO_0000192	UO_0000065	http://www.openphacts.org/units/Nanomolar	1277431	CHEMBL3089621	B	Displacement of fluorescein-labeled MS574 from recombinant human BRD4 BrD2 after 1 hr by fluorescence anisotropy assay	1	Scientific Literature	Homo sapiens		9606	Autocuration	BAO_0000357	103454	CHEMBL1163125	SINGLE PROTEIN	O60885	Bromodomain-containing protein 4	Homo sapiens	9	Protein			76008	CHEMBL3085768	24144283	J. Med. Chem.	2013	56	22	9251
A588	COc1ccc(NS(=O)(=O)c2ccc(cc2)N=Nc3cc(C)c(O)c(C)c3)cc1	13826100	Ki						=	6590	nM		5.18111		A			BAO_0000192	UO_0000065	http://www.openphacts.org/units/Nanomolar	1277431	CHEMBL3089621	B	Displacement of fluorescein-labeled MS574 from recombinant human BRD4 BrD2 after 1 hr by fluorescence anisotropy assay	1	Scientific Literature	Homo sapiens		9606	Autocuration	BAO_0000357	103454	CHEMBL1163125	SINGLE PROTEIN	O60885	Bromodomain-containing protein 4	Homo sapiens	9	Protein			76008	CHEMBL3085768	24144283	J. Med. Chem.	2013	56	22	9251
A639	Oc1ccc(cc1C(F)(F)F)N=Nc2ccc(cc2)S(=O)(=O)Nc3ccccn3	13826977	Ki						=	6830	nM		5.16558		A			BAO_0000192	UO_0000065	http://www.openphacts.org/units/Nanomolar	1277431	CHEMBL3089621	B	Displacement of fluorescein-labeled MS574 from recombinant human BRD4 BrD2 after 1 hr by fluorescence anisotropy assay	1	Scientific Literature	Homo sapiens		9606	Autocuration	BAO_0000357	103454	CHEMBL1163125	SINGLE PROTEIN	O60885	Bromodomain-containing protein 4	Homo sapiens	9	Protein			76008	CHEMBL3085768	24144283	J. Med. Chem.	2013	56	22	9251
A613	CN(c1ccccn1)S(=O)(=O)c2ccc(cc2)N=Nc3cc(C)c(O)c(C)c3	13826107	Ki						=	7120	nM		5.14752		A			BAO_0000192	UO_0000065	http://www.openphacts.org/units/Nanomolar	1277431	CHEMBL3089621	B	Displacement of fluorescein-labeled MS574 from recombinant human BRD4 BrD2 after 1 hr by fluorescence anisotropy assay	1	Scientific Literature	Homo sapiens		9606	Autocuration	BAO_0000357	103454	CHEMBL1163125	SINGLE PROTEIN	O60885	Bromodomain-containing protein 4	Homo sapiens	9	Protein			76008	CHEMBL3085768	24144283	J. Med. Chem.	2013	56	22	9251
A668	Cc1cc(cc(C)c1O)N=Nc2ccc(cc2)S(=O)(=O)Nc3ccc(cc3)C(F)(F)F	13826099	Ki						=	7140	nM		5.1463		A			BAO_0000192	UO_0000065	http://www.openphacts.org/units/Nanomolar	1277431	CHEMBL3089621	B	Displacement of fluorescein-labeled MS574 from recombinant human BRD4 BrD2 after 1 hr by fluorescence anisotropy assay	1	Scientific Literature	Homo sapiens		9606	Autocuration	BAO_0000357	103454	CHEMBL1163125	SINGLE PROTEIN	O60885	Bromodomain-containing protein 4	Homo sapiens	9	Protein			76008	CHEMBL3085768	24144283	J. Med. Chem.	2013	56	22	9251
A556	Cc1cc(cc(C)c1O)N=Nc2ccc(cc2)S(=O)(=O)Nc3cccc(c3)C(F)(F)F	13826106	Ki						=	7770	nM		5.10958		A			BAO_0000192	UO_0000065	http://www.openphacts.org/units/Nanomolar	1277431	CHEMBL3089621	B	Displacement of fluorescein-labeled MS574 from recombinant human BRD4 BrD2 after 1 hr by fluorescence anisotropy assay	1	Scientific Literature	Homo sapiens		9606	Autocuration	BAO_0000357	103454	CHEMBL1163125	SINGLE PROTEIN	O60885	Bromodomain-containing protein 4	Homo sapiens	9	Protein			76008	CHEMBL3085768	24144283	J. Med. Chem.	2013	56	22	9251
A455	COc1cc(ccc1S(=O)(=O)Nc2ccccn2)N=Nc3cc(C)c(O)c(C)c3	13826985	Ki						=	7770	nM		5.10958		A			BAO_0000192	UO_0000065	http://www.openphacts.org/units/Nanomolar	1277431	CHEMBL3089621	B	Displacement of fluorescein-labeled MS574 from recombinant human BRD4 BrD2 after 1 hr by fluorescence anisotropy assay	1	Scientific Literature	Homo sapiens		9606	Autocuration	BAO_0000357	103454	CHEMBL1163125	SINGLE PROTEIN	O60885	Bromodomain-containing protein 4	Homo sapiens	9	Protein			76008	CHEMBL3085768	24144283	J. Med. Chem.	2013	56	22	9251
A586	Cc1cc(ccc1O)N=Nc2ccc(cc2)S(=O)(=O)Nc3ccccn3	13826979	Ki						=	8200	nM		5.08619		A			BAO_0000192	UO_0000065	http://www.openphacts.org/units/Nanomolar	1277431	CHEMBL3089621	B	Displacement of fluorescein-labeled MS574 from recombinant human BRD4 BrD2 after 1 hr by fluorescence anisotropy assay	1	Scientific Literature	Homo sapiens		9606	Autocuration	BAO_0000357	103454	CHEMBL1163125	SINGLE PROTEIN	O60885	Bromodomain-containing protein 4	Homo sapiens	9	Protein			76008	CHEMBL3085768	24144283	J. Med. Chem.	2013	56	22	9251
A398	Cc1cc(cc(C)c1O)N=Nc2ccc(cc2)S(=O)(=O)Nc3ccc(F)cc3	13826986	Ki						=	8870	nM		5.05208		A			BAO_0000192	UO_0000065	http://www.openphacts.org/units/Nanomolar	1277431	CHEMBL3089621	B	Displacement of fluorescein-labeled MS574 from recombinant human BRD4 BrD2 after 1 hr by fluorescence anisotropy assay	1	Scientific Literature	Homo sapiens		9606	Autocuration	BAO_0000357	103454	CHEMBL1163125	SINGLE PROTEIN	O60885	Bromodomain-containing protein 4	Homo sapiens	9	Protein			76008	CHEMBL3085768	24144283	J. Med. Chem.	2013	56	22	9251
A552	Cc1nc(N=Nc2ccc(cc2)S(=O)(=O)Nc3ccccn3)c(C)c(C)c1O	13826971	Ki						=	9100	nM		5.04096		A			BAO_0000192	UO_0000065	http://www.openphacts.org/units/Nanomolar	1277431	CHEMBL3089621	B	Displacement of fluorescein-labeled MS574 from recombinant human BRD4 BrD2 after 1 hr by fluorescence anisotropy assay	1	Scientific Literature	Homo sapiens		9606	Autocuration	BAO_0000357	103454	CHEMBL1163125	SINGLE PROTEIN	O60885	Bromodomain-containing protein 4	Homo sapiens	9	Protein			76008	CHEMBL3085768	24144283	J. Med. Chem.	2013	56	22	9251
A641	Cc1cc(cc(C)c1O)N=Nc2ccc(cc2)S(=O)(=O)Nc3ccc(cc3)C(=O)N	13826098	Ki						=	12200	nM		4.91364		N			BAO_0000192	UO_0000065	http://www.openphacts.org/units/Nanomolar	1277431	CHEMBL3089621	B	Displacement of fluorescein-labeled MS574 from recombinant human BRD4 BrD2 after 1 hr by fluorescence anisotropy assay	1	Scientific Literature	Homo sapiens		9606	Autocuration	BAO_0000357	103454	CHEMBL1163125	SINGLE PROTEIN	O60885	Bromodomain-containing protein 4	Homo sapiens	9	Protein			76008	CHEMBL3085768	24144283	J. Med. Chem.	2013	56	22	9251
A669	Cc1cc(N=Nc2cc(c(C)cc2C)S(=O)(=O)O)c(N)cc1O	13826112	Ki						=	19740	nM		4.70465		N			BAO_0000192	UO_0000065	http://www.openphacts.org/units/Nanomolar	1277431	CHEMBL3089621	B	Displacement of fluorescein-labeled MS574 from recombinant human BRD4 BrD2 after 1 hr by fluorescence anisotropy assay	1	Scientific Literature	Homo sapiens		9606	Autocuration	BAO_0000357	103454	CHEMBL1163125	SINGLE PROTEIN	O60885	Bromodomain-containing protein 4	Homo sapiens	9	Protein			76008	CHEMBL3085768	24144283	J. Med. Chem.	2013	56	22	9251
A422	Cc1cc(N=Nc2ccc(cc2)S(=O)(=O)Nc3ccccn3)nc(C)c1O	13826972	Ki						=	24600	nM		4.60906		N			BAO_0000192	UO_0000065	http://www.openphacts.org/units/Nanomolar	1277431	CHEMBL3089621	B	Displacement of fluorescein-labeled MS574 from recombinant human BRD4 BrD2 after 1 hr by fluorescence anisotropy assay	1	Scientific Literature	Homo sapiens		9606	Autocuration	BAO_0000357	103454	CHEMBL1163125	SINGLE PROTEIN	O60885	Bromodomain-containing protein 4	Homo sapiens	9	Protein			76008	CHEMBL3085768	24144283	J. Med. Chem.	2013	56	22	9251
A590	Cc1cc(cc(C)c1O)N=Nc2ccc(cc2)S(=O)(=O)Nc3ccc(Br)cn3	13826102	Ki						=	38700	nM		4.41229		N			BAO_0000192	UO_0000065	http://www.openphacts.org/units/Nanomolar	1277431	CHEMBL3089621	B	Displacement of fluorescein-labeled MS574 from recombinant human BRD4 BrD2 after 1 hr by fluorescence anisotropy assay	1	Scientific Literature	Homo sapiens		9606	Autocuration	BAO_0000357	103454	CHEMBL1163125	SINGLE PROTEIN	O60885	Bromodomain-containing protein 4	Homo sapiens	9	Protein			76008	CHEMBL3085768	24144283	J. Med. Chem.	2013	56	22	9251
A549	Cc1cc(cc(C)c1O)N=Nc2cccc(c2)S(=O)(=O)Nc3ccccn3	13826110	Ki						=	40360	nM		4.39405		N			BAO_0000192	UO_0000065	http://www.openphacts.org/units/Nanomolar	1277431	CHEMBL3089621	B	Displacement of fluorescein-labeled MS574 from recombinant human BRD4 BrD2 after 1 hr by fluorescence anisotropy assay	1	Scientific Literature	Homo sapiens		9606	Autocuration	BAO_0000357	103454	CHEMBL1163125	SINGLE PROTEIN	O60885	Bromodomain-containing protein 4	Homo sapiens	9	Protein			76008	CHEMBL3085768	24144283	J. Med. Chem.	2013	56	22	9251
A858	Cc1cc(cc(C)c1O)N=Nc2ccc(cc2)S(=O)(=O)NCc3ccc(cc3)C(F)(F)F	13826108	Ki						>	100000	nM		4		N			BAO_0000192	UO_0000065	http://www.openphacts.org/units/Nanomolar	1277431	CHEMBL3089621	B	Displacement of fluorescein-labeled MS574 from recombinant human BRD4 BrD2 after 1 hr by fluorescence anisotropy assay	1	Scientific Literature	Homo sapiens		9606	Autocuration	BAO_0000357	103454	CHEMBL1163125	SINGLE PROTEIN	O60885	Bromodomain-containing protein 4	Homo sapiens	9	Protein			76008	CHEMBL3085768	24144283	J. Med. Chem.	2013	56	22	9251
60171584	CC1=CC(=NNC2=CC=C(C=C2)S(=O)(=O)NC3=CC=CC=N3)C=C(C1=O)C		Ki									3.54	5.451		A						1054709			Displacement of fluorescein-labeled MS226 from recombinant human BRD7 after 1 hr by fluorescence anisotropy assay												Bromodomain-containing protein 7
73386670	CC1=C/C(=N\NC2=CC=C(C=C2)S(=O)(=O)NC3=CC=CC=N3)/C(=CC1=O)N		Ki									2.72	5.56543		A						1054709			Displacement of fluorescein-labeled MS226 from recombinant human BRD7 after 1 hr by fluorescence anisotropy assay												Bromodomain-containing protein 7
73386671	CC1=C/C(=N\NC2=CC=C(C=C2)S(=O)(=O)NC3=CC=CC=N3)/C(=C(C1=O)C)N		Ki									1.43	5.84466		A						1054709			Displacement of fluorescein-labeled MS226 from recombinant human BRD7 after 1 hr by fluorescence anisotropy assay												Bromodomain-containing protein 7
76331639	CC1=C/C(=N\NC2=CC=C(C=C2)S(=O)(=O)NC3=CC=CC=N3)/C(=C(C1=O)Cl)N		Ki									1.43	5.84466		A						1054709			Displacement of fluorescein-labeled MS226 from recombinant human BRD7 after 1 hr by fluorescence anisotropy assay												Bromodomain-containing protein 7
A471	Cc1cc(N=Nc2ccc(cc2)S(=O)(=O)Nc3ccccn3)c(N)c(Cl)c1O	13826951	Ki						<	1430	nM		5.84466		A			BAO_0000192	UO_0000065	http://www.openphacts.org/units/Nanomolar	1277428	CHEMBL3089618	B	Displacement of fluorescein-labeled MS226 from recombinant human BRD7 after 1 hr by fluorescence anisotropy assay	1	Scientific Literature	Homo sapiens		9606	Autocuration	BAO_0000357	107970	CHEMBL3085622	SINGLE PROTEIN	Q9NPI1	Bromodomain-containing protein 7	Homo sapiens	9	Protein			76008	CHEMBL3085768	24144283	J. Med. Chem.	2013	56	22	9251
A419	Cc1cc(N=Nc2ccc(cc2)S(=O)(=O)Nc3ccccn3)c(N)c(C)c1O	13826952	Ki						<	1430	nM		5.84466		A			BAO_0000192	UO_0000065	http://www.openphacts.org/units/Nanomolar	1277428	CHEMBL3089618	B	Displacement of fluorescein-labeled MS226 from recombinant human BRD7 after 1 hr by fluorescence anisotropy assay	1	Scientific Literature	Homo sapiens		9606	Autocuration	BAO_0000357	107970	CHEMBL3085622	SINGLE PROTEIN	Q9NPI1	Bromodomain-containing protein 7	Homo sapiens	9	Protein			76008	CHEMBL3085768	24144283	J. Med. Chem.	2013	56	22	9251
A470	Cc1cc(N=Nc2ccc(cc2)S(=O)(=O)Nc3ccccn3)c(N)cc1O	13826953	Ki						=	2720	nM		5.56543		A			BAO_0000192	UO_0000065	http://www.openphacts.org/units/Nanomolar	1277428	CHEMBL3089618	B	Displacement of fluorescein-labeled MS226 from recombinant human BRD7 after 1 hr by fluorescence anisotropy assay	1	Scientific Literature	Homo sapiens		9606	Autocuration	BAO_0000357	107970	CHEMBL3085622	SINGLE PROTEIN	Q9NPI1	Bromodomain-containing protein 7	Homo sapiens	9	Protein			76008	CHEMBL3085768	24144283	J. Med. Chem.	2013	56	22	9251
A388	Cc1cc(cc(C)c1O)N=Nc2ccc(cc2)S(=O)(=O)Nc3ccccn3	13826954	Ki						=	3540	nM		5.451		A			BAO_0000192	UO_0000065	http://www.openphacts.org/units/Nanomolar	1277428	CHEMBL3089618	B	Displacement of fluorescein-labeled MS226 from recombinant human BRD7 after 1 hr by fluorescence anisotropy assay	1	Scientific Literature	Homo sapiens		9606	Autocuration	BAO_0000357	107970	CHEMBL3085622	SINGLE PROTEIN	Q9NPI1	Bromodomain-containing protein 7	Homo sapiens	9	Protein			76008	CHEMBL3085768	24144283	J. Med. Chem.	2013	56	22	9251
1511198	CNS(=O)(=O)c1cc(ccc1C)c2nn3c(C)nnc3c4ccccc24	13891640	IC50						=	1258.93	nM		5.9		A			BAO_0000190	UO_0000065	http://www.openphacts.org/units/Nanomolar	1287024	CHEMBL3111335	B	Displacement of H2K9(Ac)K13(Ac)K15(Ac) peptide from BRD9 bromodomain (unknown origin) by AlphaScreen assay	1	Scientific Literature	Homo sapiens		9606	Autocuration	BAO_0000357	108000	CHEMBL3108640	SINGLE PROTEIN	Q9H8M2	Bromodomain-containing protein 9	Homo sapiens	9	Protein			76683	CHEMBL3108763	24313754	J. Med. Chem.	2014	57	2	462
1511199	CN(C)S(=O)(=O)c1cc(ccc1C)c2nn3c(C)nnc3c4ccccc24	13891643	IC50						=	1584.89	nM		5.8		A			BAO_0000190	UO_0000065	http://www.openphacts.org/units/Nanomolar	1287024	CHEMBL3111335	B	Displacement of H2K9(Ac)K13(Ac)K15(Ac) peptide from BRD9 bromodomain (unknown origin) by AlphaScreen assay	1	Scientific Literature	Homo sapiens		9606	Autocuration	BAO_0000357	108000	CHEMBL3108640	SINGLE PROTEIN	Q9H8M2	Bromodomain-containing protein 9	Homo sapiens	9	Protein			76683	CHEMBL3108763	24313754	J. Med. Chem.	2014	57	2	462
4907545	Cc1ccc(cc1NS(=O)(=O)C)c2nn3c(C)nnc3c4ccccc24	13891630	IC50						=	501.19	nM		6.3		A			BAO_0000190	UO_0000065	http://www.openphacts.org/units/Nanomolar	1287024	CHEMBL3111335	B	Displacement of H2K9(Ac)K13(Ac)K15(Ac) peptide from BRD9 bromodomain (unknown origin) by AlphaScreen assay	1	Scientific Literature	Homo sapiens		9606	Autocuration	BAO_0000357	108000	CHEMBL3108640	SINGLE PROTEIN	Q9H8M2	Bromodomain-containing protein 9	Homo sapiens	9	Protein			76683	CHEMBL3108763	24313754	J. Med. Chem.	2014	57	2	462
12726857	C1=CC=C(C=C1)C2=NN3C(=NN=C3C(F)(F)F)C=C2														A						1079736			Binding affinity to human recombinant biotinylated BRD9 by UV spectrophotometric analysis												Bromodomain-containing protein 9
71756812	CC1=NN=C2N1N=C(C=C2N)Cl														A						1079736			Binding affinity to human recombinant biotinylated BRD9 by UV spectrophotometric analysis												Bromodomain-containing protein 9
76310219	Cc1nnc2c3ccccc3c(nn12)c4ccc(N5CCOCC5)c(NS(=O)(=O)c6ccccc6Cl)c4	13891624	IC50						=	199.53	nM		6.7		A			BAO_0000190	UO_0000065	http://www.openphacts.org/units/Nanomolar	1287024	CHEMBL3111335	B	Displacement of H2K9(Ac)K13(Ac)K15(Ac) peptide from BRD9 bromodomain (unknown origin) by AlphaScreen assay	1	Scientific Literature	Homo sapiens		9606	Autocuration	BAO_0000357	108000	CHEMBL3108640	SINGLE PROTEIN	Q9H8M2	Bromodomain-containing protein 9	Homo sapiens	9	Protein			76683	CHEMBL3108763	24313754	J. Med. Chem.	2014	57	2	462
76314855	CCOC(=O)N(C1=C(C=CC(=C1)C2=NN3C(=NN=C3C(=C2)N)C)C)S(=O)(=O)C4=CC=CC=C4Cl														A						1079736			Binding affinity to human recombinant biotinylated BRD9 by UV spectrophotometric analysis												Bromodomain-containing protein 9
76314856	COC1=CC=C(C=C1)C2=NN3C(=NN=C3C(F)(F)F)C=C2														A						1079736			Binding affinity to human recombinant biotinylated BRD9 by UV spectrophotometric analysis												Bromodomain-containing protein 9
76317442	Cc1nnc2c3ccccc3c(nn12)c4ccc(N5CCOCC5)c(NS(=O)(=O)C)c4	13891628	IC50						=	316.23	nM		6.5		A			BAO_0000190	UO_0000065	http://www.openphacts.org/units/Nanomolar	1287024	CHEMBL3111335	B	Displacement of H2K9(Ac)K13(Ac)K15(Ac) peptide from BRD9 bromodomain (unknown origin) by AlphaScreen assay	1	Scientific Literature	Homo sapiens		9606	Autocuration	BAO_0000357	108000	CHEMBL3108640	SINGLE PROTEIN	Q9H8M2	Bromodomain-containing protein 9	Homo sapiens	9	Protein			76683	CHEMBL3108763	24313754	J. Med. Chem.	2014	57	2	462
76318466	CC1=C(C=C(C=C1)C2=NN3C(=NN=C3C(=C2)N)C)NS(=O)(=O)C4=CC(=CC=C4)Cl														A						1079736			Binding affinity to human recombinant biotinylated BRD9 by UV spectrophotometric analysis												Bromodomain-containing protein 9
76325757	Cc1nnc2c(NC(=O)OC(C)(C)C)cc(nn12)c3ccccc3	13973360	Kd						=	8350	nM		5.08		A			BAO_0000034	UO_0000065	http://www.openphacts.org/units/Nanomolar	1301085	CHEMBL3134643	B	Binding affinity to human recombinant biotinylated BRD9 compound treated in ammonium acetate buffer by FAC-MS analysis	1	Scientific Literature	Homo sapiens		9606	Autocuration	BAO_0000357	108000	CHEMBL3108640	SINGLE PROTEIN	Q9H8M2	Bromodomain-containing protein 9	Homo sapiens	9	Protein			77364	CHEMBL3132771		MedChemComm	2014	5	4	540
76325758	CC1=C(C=C(C=C1)C2=NN3C(=NN=C3C(=C2)N)C)NS(=O)(=O)C4=CC=CC=C4Cl														A						1079736			Binding affinity to human recombinant biotinylated BRD9 by UV spectrophotometric analysis												Bromodomain-containing protein 9
76328466	COc1ccc(cc1)S(=O)(=O)Nc2cc(ccc2N3CCN(C)CC3)c4nn5c(C)nnc5c6ccccc46	13891633	IC50						=	630.96	nM		6.2		A			BAO_0000190	UO_0000065	http://www.openphacts.org/units/Nanomolar	1287024	CHEMBL3111335	B	Displacement of H2K9(Ac)K13(Ac)K15(Ac) peptide from BRD9 bromodomain (unknown origin) by AlphaScreen assay	1	Scientific Literature	Homo sapiens		9606	Autocuration	BAO_0000357	108000	CHEMBL3108640	SINGLE PROTEIN	Q9H8M2	Bromodomain-containing protein 9	Homo sapiens	9	Protein			76683	CHEMBL3108763	24313754	J. Med. Chem.	2014	57	2	462
76329338	CCOC(=O)N(C1=C(C=CC(=C1)C2=NN3C(=NN=C3C(=C2)N)C)C)S(=O)(=O)C4=CC=C(C=C4)Cl														A						1079736			Binding affinity to human recombinant biotinylated BRD9 by UV spectrophotometric analysis												Bromodomain-containing protein 9
76329339	CC1=C(C=C(C=C1)C2=NN3C(=NN=C3C(=C2)N)C)NS(=O)(=O)C4=CC(=C(C=C4)Cl)Cl														A						1079736			Binding affinity to human recombinant biotinylated BRD9 by UV spectrophotometric analysis												Bromodomain-containing protein 9
76335637	Cc1nnc2c3ccccc3c(nn12)c4ccc(N5CCOCC5)c(NS(=O)(=O)c6ccc(Cl)cc6)c4	13891636	IC50						=	1000	nM		6		A			BAO_0000190	UO_0000065	http://www.openphacts.org/units/Nanomolar	1287024	CHEMBL3111335	B	Displacement of H2K9(Ac)K13(Ac)K15(Ac) peptide from BRD9 bromodomain (unknown origin) by AlphaScreen assay	1	Scientific Literature	Homo sapiens		9606	Autocuration	BAO_0000357	108000	CHEMBL3108640	SINGLE PROTEIN	Q9H8M2	Bromodomain-containing protein 9	Homo sapiens	9	Protein			76683	CHEMBL3108763	24313754	J. Med. Chem.	2014	57	2	462
46907787	Cc1sc2c(C(=N[C@@H](CC(=O)OC(C)(C)C)c3nnc(C)n23)c4ccc(Cl)cc4)c1C	8046390	Kd						=	190.1	nM		6.72		A			BAO_0000034	UO_0000065	http://www.openphacts.org/units/Nanomolar	807441	CHEMBL1958563	B	Binding affinity to BRDT-BD1 by isothermal titration calorimetry	1	Scientific Literature				Autocuration	BAO_0000357	104265	CHEMBL1795185	SINGLE PROTEIN	Q58F21	Bromodomain testis-specific protein	Homo sapiens	8	Homologous protein			61257	CHEMBL1955852	22316554	Bioorg. Med. Chem.	2012	20	6	1887
12726857	C1=CC=C(C=C1)C2=NN3C(=NN=C3C(F)(F)F)C=C2														N						1079733			Binding affinity to BRPF1 (unknown origin) at 4 uM by thermal shift assay												BRPF1
12726857	C1=CC=C(C=C1)C2=NN3C(=NN=C3C(F)(F)F)C=C2														N						1079731			Binding affinity to BRPF3 (unknown origin) at 4 uM by thermal shift assay												BRPF3
76314856	COC1=CC=C(C=C1)C2=NN3C(=NN=C3C(F)(F)F)C=C2														N						1079731			Binding affinity to BRPF3 (unknown origin) at 4 uM by thermal shift assay												BRPF3
76329338	CCOC(=O)N(C1=C(C=CC(=C1)C2=NN3C(=NN=C3C(=C2)N)C)C)S(=O)(=O)C4=CC=C(C=C4)Cl														N						1079731			Binding affinity to BRPF3 (unknown origin) at 4 uM by thermal shift assay												BRPF3
12726857	C1=CC=C(C=C1)C2=NN3C(=NN=C3C(F)(F)F)C=C2														N						1079732			Binding affinity to CECR2 (unknown origin) at 4 uM by thermal shift assay												CECR2
76310219	CC1=NN=C2N1N=C(C3=CC=CC=C32)C4=CC(=C(C=C4)N5CCOCC5)NS(=O)(=O)C6=CC=CC=C6Cl		IC50									25.1189	4.6	4.6	N						1066065			Displacement of H4Ac4 peptide from CECR2 bromodomain (unknown origin) by AlphaScreen assay												CECR2
76314856	COC1=CC=C(C=C1)C2=NN3C(=NN=C3C(F)(F)F)C=C2														N						1079732			Binding affinity to CECR2 (unknown origin) at 4 uM by thermal shift assay												CECR2
76329338	CCOC(=O)N(C1=C(C=CC(=C1)C2=NN3C(=NN=C3C(=C2)N)C)C)S(=O)(=O)C4=CC=C(C=C4)Cl														N						1079732			Binding affinity to CECR2 (unknown origin) at 4 uM by thermal shift assay												CECR2
2123	CN(C)C1=NC(=NC(=N1)N(C)C)N(C)C		Potency												N						916			Confirmation Concentration-Response Assay for Cell signaling CRE-BLA (Fsk stim)												CREB-binding protein
2690	C1=COC(=C1)C2=NN3C(=N2)C4=C(C=CC(=C4)Cl)N=C3N		Potency												N						905			Cell Viability - CRE-beta lactamase CHO cell - 24 hr assay												CREB-binding protein
4680	COC1=C(C=C(C=C1)CC2=NC=CC3=CC(=C(C=C32)OC)OC)OC		Potency									0.7079	6.15003		A						907			Confirmation Concentration-Response Assay for Cell signaling CRE-BLA (Fsk stim) - HEK293 CREB Luciferase												CREB-binding protein
13387	CN1CCCC1=O	6365473	IC50						=	2300000	nM		2.64		N	Outside typical range		BAO_0000190	UO_0000065	http://www.openphacts.org/units/Nanomolar	770209	CHEMBL1832999	B	Inhibition of CREBBP	1	Scientific Literature				Autocuration	BAO_0000357	101310	CHEMBL5747	SINGLE PROTEIN	Q92793	CREB-binding protein	Homo sapiens	8	Homologous protein			58989	CHEMBL1828554	21851057	J. Med. Chem.	2011	54	19	6761
252353	CCCCCCCCCCCCCCC(C(=O)OCC)C(=O)OCC														A						604032			Inhibition of human recombinant KAT3A expressed in Escherichia coli BL21 using histone H4 peptide as substrate at 50 uM after 2 hrs relative to control												CREB-binding protein
393595	C1=CC=C(C=C1)CC(=O)NC2=NC3=C(C=C(C=C3)Cl)C4=NC(=NN42)C5=CC=CO5		Potency												N						906			Cell Viability - CRE-beta lactamase CHO cell - 40 hr assay												CREB-binding protein
563972	CSC1=NC2=C(C3=CC=CC=C3N2CCC4=CC=CC=C4)N=N1		Potency									3.1623	5.5		A						907			Confirmation Concentration-Response Assay for Cell signaling CRE-BLA (Fsk stim) - HEK293 CREB Luciferase												CREB-binding protein
646792	C1CN(CCC1(C2=CC=C(C=C2)Cl)O)S(=O)(=O)C3=CC4=C(C=C3)OCCO4		Potency												N						906			Cell Viability - CRE-beta lactamase CHO cell - 40 hr assay												CREB-binding protein
646897	CN(C)C=C1C(=O)N(C(=O)N(C1=O)C2CCCCC2)C3CCCCC3		Potency												N						905			Cell Viability - CRE-beta lactamase CHO cell - 24 hr assay												CREB-binding protein
648246	CC1=CC(=NN1C2=NC(=NC(=N2)NC3=CC=CC=C3)N4C(=CC(=N4)C)C)C		Potency												N						916			Confirmation Concentration-Response Assay for Cell signaling CRE-BLA (Fsk stim)												CREB-binding protein
648950	CC1=CC(=C(C=C1)C)N2CCN(CC2)S(=O)(=O)C3=CC4=C(C=C3)OCCO4		Potency									12.5893	4.9	4.9	N						907			Confirmation Concentration-Response Assay for Cell signaling CRE-BLA (Fsk stim) - HEK293 CREB Luciferase												CREB-binding protein
649929	C1COCCN1S(=O)(=O)C2=CC(=C(C=C2)Cl)C(=O)NC3=CC=CC=C3O		Potency									15.8489	4.8	4.8	N						907			Confirmation Concentration-Response Assay for Cell signaling CRE-BLA (Fsk stim) - HEK293 CREB Luciferase												CREB-binding protein
651246	CC1=C(C(NC(=O)N1)C2=CC(=C(C=C2)OCC(=O)N)OC)C(=O)OC(C)(C)C		Potency									12.5893	4.9	4.9	N						907			Confirmation Concentration-Response Assay for Cell signaling CRE-BLA (Fsk stim) - HEK293 CREB Luciferase												CREB-binding protein
653280	CC1=CC=C(C=C1)NC2=C3CCCC3=NC4=NC=NN24		Potency									12.5893	4.9	4.9	N						907			Confirmation Concentration-Response Assay for Cell signaling CRE-BLA (Fsk stim) - HEK293 CREB Luciferase												CREB-binding protein
653468	CC1=CC2=C(C=C1)C(=NC(=N2)NC3=NC(=O)C=C(N3)COC)C		Potency												N						906			Cell Viability - CRE-beta lactamase CHO cell - 40 hr assay												CREB-binding protein
654453	CC1CCC2=C(C1)SC3=C2C(=NC(=N3)C4CC4)SCC(=O)NCC5=CC=CO5		Potency												N						916			Confirmation Concentration-Response Assay for Cell signaling CRE-BLA (Fsk stim)												CREB-binding protein
654516	CCN(CC)C1=NC2=CC=CC=C2N3C1=NN=C3		Potency									15.8489	4.8	4.8	N						916			Confirmation Concentration-Response Assay for Cell signaling CRE-BLA (Fsk stim)												CREB-binding protein
657439	CN1C2=C(C(NC1=O)C3=CC=CC=C3)C(=O)N(C2)CC4=CC=CC=C4		Potency												N						916			Confirmation Concentration-Response Assay for Cell signaling CRE-BLA (Fsk stim)												CREB-binding protein
660800	CC1=C(N(NC1=O)C2=NC(=NC(=N2)NC3=CC=C(C=C3)OC)NC4=CC=C(C=C4)OC)C		Potency									0.5012	6.29999		A						907			Confirmation Concentration-Response Assay for Cell signaling CRE-BLA (Fsk stim) - HEK293 CREB Luciferase												CREB-binding protein
660996	CC1=NC2=NC=NN2C(=C1)NC3=CC4=CC=CC=C4C=C3		Potency												N						916			Confirmation Concentration-Response Assay for Cell signaling CRE-BLA (Fsk stim)												CREB-binding protein
662261	COC1=CC(=CC(=C1OC)OC)C2=NN=C3N2N=C(S3)C4CCCCC4		Potency									0.1259	6.89997		A						907			Confirmation Concentration-Response Assay for Cell signaling CRE-BLA (Fsk stim) - HEK293 CREB Luciferase												CREB-binding protein
663161	CN1C2=CC=CC=C2N=C1/C(=C/NC3=CC=CC=N3)/C#N		Potency									12.5893	4.9	4.9	N						907			Confirmation Concentration-Response Assay for Cell signaling CRE-BLA (Fsk stim) - HEK293 CREB Luciferase												CREB-binding protein
663910	CC1=NC2=C(C(=N1)NCC3=CC4=C(C=C3)OCO4)OC5=CC=CC=C52		Potency									12.5893	4.9	4.9	N						907			Confirmation Concentration-Response Assay for Cell signaling CRE-BLA (Fsk stim) - HEK293 CREB Luciferase												CREB-binding protein
664682	COC1=C(C=C(C=C1)C2C3=C(C(=O)N2CCN4CCOCC4)OC5=CC=CC=C5C3=O)OC		Potency									14.1254	4.85	4.85	N						907			Confirmation Concentration-Response Assay for Cell signaling CRE-BLA (Fsk stim) - HEK293 CREB Luciferase												CREB-binding protein
665415	CC1CCC2=C(C1)C3=C(S2)N=C(N4C3=NC=N4)N5CCN(CC5)CCO		Potency									12.5893	4.9	4.9	N						907			Confirmation Concentration-Response Assay for Cell signaling CRE-BLA (Fsk stim) - HEK293 CREB Luciferase												CREB-binding protein
665883	COC1=CC(=CC(=C1OC)OC)C2=NN=C3N2N=C(S3)C4=CC=CC=N4		Potency												N						906			Cell Viability - CRE-beta lactamase CHO cell - 40 hr assay												CREB-binding protein
665910	C1CC2=C(C1)NN=C2C3=NN=C4N3N=C(CS4)C5=CC(=C(C=C5)Cl)Cl		Potency									15.8489	4.8	4.8	N						906			Cell Viability - CRE-beta lactamase CHO cell - 40 hr assay												CREB-binding protein
698409	CC1=CC2=C(C=C1)N=C(N=C2OC)NC3=NC(=O)C4=CC=CC=C4N3		Potency									3.9811	5.4		A						906			Cell Viability - CRE-beta lactamase CHO cell - 40 hr assay												CREB-binding protein
1511198	CNS(=O)(=O)c1cc(ccc1C)c2nn3c(C)nnc3c4ccccc24	13891642	IC50						=	1584.89	nM		5.8		A			BAO_0000190	UO_0000065	http://www.openphacts.org/units/Nanomolar	1287022	CHEMBL3111333	B	Displacement of H3K56(Ac) peptide from CREBBP bromodomain (unknown origin) by AlphaScreen assay	1	Scientific Literature	Homo sapiens		9606	Autocuration	BAO_0000357	101310	CHEMBL5747	SINGLE PROTEIN	Q92793	CREB-binding protein	Homo sapiens	9	Protein			76683	CHEMBL3108763	24313754	J. Med. Chem.	2014	57	2	462
1511199	CN(C)S(=O)(=O)c1cc(ccc1C)c2nn3c(C)nnc3c4ccccc24	13891639	IC50						=	1258.93	nM		5.9		A			BAO_0000190	UO_0000065	http://www.openphacts.org/units/Nanomolar	1287022	CHEMBL3111333	B	Displacement of H3K56(Ac) peptide from CREBBP bromodomain (unknown origin) by AlphaScreen assay	1	Scientific Literature	Homo sapiens		9606	Autocuration	BAO_0000357	101310	CHEMBL5747	SINGLE PROTEIN	Q92793	CREB-binding protein	Homo sapiens	9	Protein			76683	CHEMBL3108763	24313754	J. Med. Chem.	2014	57	2	462
1561807	CC1=CC=C(C=C1)CN2C3=CC=CC=C3/C(=C/4\C(=O)N(C(=S)S4)CCCCCC(=O)O)/C2=O		IC50									41	4.38722	4.38722	N						1119338			Inhibition of KAT3A (1319 to 1710) (unknown origin) using biotinylated histone H3 as substrate after 10 mins by TR-FRET analysis relative to control												CREB-binding protein
2153102	CC1=CC=C(C=C1)N2C3=NC(=NC(=O)C3=CN2)SCC(=O)N4CCOCC4		Potency												N						916			Confirmation Concentration-Response Assay for Cell signaling CRE-BLA (Fsk stim)												CREB-binding protein
2224815	CN(C)C1=NC(=NC(=N1)N)CSC2=NNC(=N2)C3=CC=CC=C3		Potency									12.5893	4.9	4.9	N						907			Confirmation Concentration-Response Assay for Cell signaling CRE-BLA (Fsk stim) - HEK293 CREB Luciferase												CREB-binding protein
2352857	C1CC2=CC=CC=C2N(C1)C(=O)C3=C(C=CC(=C3)S(=O)(=O)N4CCOCC4)F		Potency												N						916			Confirmation Concentration-Response Assay for Cell signaling CRE-BLA (Fsk stim)												CREB-binding protein
2392189	CCOC(=O)C1=CC=CC=C1NC(=O)C2=C(C=CC(=C2)S(=O)(=O)N3CCOCC3)F		Potency									12.5893	4.9	4.9	N						916			Confirmation Concentration-Response Assay for Cell signaling CRE-BLA (Fsk stim)												CREB-binding protein
2589475	CC1=C(SC2=C1C(=O)N(C(=N2)SCC(=O)NC3=C(C=CS3)C(=O)N)CC=C)C		Potency									3.9811	5.4		A						907			Confirmation Concentration-Response Assay for Cell signaling CRE-BLA (Fsk stim) - HEK293 CREB Luciferase												CREB-binding protein
2824992	CN1C(=O)CC(NC2=CC=CC=C21)C3=CC=CC=C3														A						1141839			Binding affinity to CREBBP (unknown origin) by thermal shift assay												CREB-binding protein
2972834	CCOC(=O)C1=C(NC(=O)NC1C2=CC=C(C=C2)Cl)CN3CCC(CC3)C		Potency									12.5893	4.9	4.9	N						907			Confirmation Concentration-Response Assay for Cell signaling CRE-BLA (Fsk stim) - HEK293 CREB Luciferase												CREB-binding protein
2999919	C1C(=NN2C(=NN=C2S1)CC3=CC=CC=C3)C4=CC=C(C=C4)F		Potency									12.5893	4.9	4.9	N						907			Confirmation Concentration-Response Assay for Cell signaling CRE-BLA (Fsk stim) - HEK293 CREB Luciferase												CREB-binding protein
3243126	CN1C2=CC=CC=C2C3=C(C1=O)C=C(N3C)C(=O)N4CCC5(CC4)OCCO5		Potency									25.1189	4.6	4.6	N						916			Confirmation Concentration-Response Assay for Cell signaling CRE-BLA (Fsk stim)												CREB-binding protein
3244223	CCN(C1=C(C=CC(=C1)OC)OC)C(=O)C2=CN(C(=O)C3=CC(=C(C=C32)OC)OC)C		Potency									12.5893	4.9	4.9	N						907			Confirmation Concentration-Response Assay for Cell signaling CRE-BLA (Fsk stim) - HEK293 CREB Luciferase												CREB-binding protein
4907545	Cc1ccc(cc1NS(=O)(=O)C)c2nn3c(C)nnc3c4ccccc24	13891944	IC50						=	15848.9	nM		4.8		N			BAO_0000190	UO_0000065	http://www.openphacts.org/units/Nanomolar	1287022	CHEMBL3111333	B	Displacement of H3K56(Ac) peptide from CREBBP bromodomain (unknown origin) by AlphaScreen assay	1	Scientific Literature	Homo sapiens		9606	Autocuration	BAO_0000357	101310	CHEMBL5747	SINGLE PROTEIN	Q92793	CREB-binding protein	Homo sapiens	9	Protein			76683	CHEMBL3108763	24313754	J. Med. Chem.	2014	57	2	462
4908238	CCC(=O)Nc1cc(ccc1C)c2nn3c(C)nnc3c4ccccc24	13891654	IC50						=	6309.57	nM		5.2		A			BAO_0000190	UO_0000065	http://www.openphacts.org/units/Nanomolar	1287022	CHEMBL3111333	B	Displacement of H3K56(Ac) peptide from CREBBP bromodomain (unknown origin) by AlphaScreen assay	1	Scientific Literature	Homo sapiens		9606	Autocuration	BAO_0000357	101310	CHEMBL5747	SINGLE PROTEIN	Q92793	CREB-binding protein	Homo sapiens	9	Protein			76683	CHEMBL3108763	24313754	J. Med. Chem.	2014	57	2	462
5281614	C1=CC(=C(C=C1C2=C(C(=O)C3=C(O2)C=C(C=C3)O)O)O)O		Potency												N						906			Cell Viability - CRE-beta lactamase CHO cell - 40 hr assay												CREB-binding protein
5307292	CN1C2=CC=CC=C2C3=C(C1=O)C=C(N3C)C(=O)NCCCN4CCCC4=O		Potency									25.1189	4.6	4.6	N						916			Confirmation Concentration-Response Assay for Cell signaling CRE-BLA (Fsk stim)												CREB-binding protein
5307613	CCCN(CCC)CCNC(=O)C1=CC2=C(N1C)C3=CC=CC=C3N(C2=O)C		Potency									12.5893	4.9	4.9	N						907			Confirmation Concentration-Response Assay for Cell signaling CRE-BLA (Fsk stim) - HEK293 CREB Luciferase												CREB-binding protein
5307716	CCN1C2=C(C=C(C=C2)NC3=CC(=NC4=NC=NN34)C)C5=CC=CC=C51		Potency												N						907			Confirmation Concentration-Response Assay for Cell signaling CRE-BLA (Fsk stim) - HEK293 CREB Luciferase												CREB-binding protein
5310161	COC1=C(C=CC(=C1)C2C3=C(C(=O)N2CC=C)OC4=CC=CC=C4C3=O)O		Potency									12.5893	4.9	4.9	N						907			Confirmation Concentration-Response Assay for Cell signaling CRE-BLA (Fsk stim) - HEK293 CREB Luciferase												CREB-binding protein
5310362	COC(=O)C1=CC=C(O1)CSC2=NN3C(=NN=C3C4=CC(=CC=C4)F)C=C2		Potency									15.8489	4.8	4.8	N						916			Confirmation Concentration-Response Assay for Cell signaling CRE-BLA (Fsk stim)												CREB-binding protein
5310920	CN1C(=O)C(=CNCCOC2=CC=C(C=C2)Cl)C(=O)N(C1=O)C		Potency									15.8489	4.8	4.8	N						916			Confirmation Concentration-Response Assay for Cell signaling CRE-BLA (Fsk stim)												CREB-binding protein
5325760	Cc1onc(C)c1c2ccccc2	6364750	IC50						>	200000	nM		3.7		N	Outside typical range		BAO_0000190	UO_0000065	http://www.openphacts.org/units/Nanomolar	770203	CHEMBL1832993	B	Displacement of H3K56Ac from human CREBBP by peptide displacement assay	1	Scientific Literature	Homo sapiens		9606	Autocuration	BAO_0000357	101310	CHEMBL5747	SINGLE PROTEIN	Q92793	CREB-binding protein	Homo sapiens	9	Protein			58989	CHEMBL1828554	21851057	J. Med. Chem.	2011	54	19	6761
5389060	CC(C)C(=O)N1CCN(CC1)CCNC=C2C(=O)N(C(=O)N(C2=O)C)C		Potency												N						916			Confirmation Concentration-Response Assay for Cell signaling CRE-BLA (Fsk stim)												CREB-binding protein
5389591	CC(=C1C(=O)N(C(=O)N(C1=O)C)C)NC2=C(C=C(C=C2)OC)OC		Potency									12.5893	4.9	4.9	N						907			Confirmation Concentration-Response Assay for Cell signaling CRE-BLA (Fsk stim) - HEK293 CREB Luciferase												CREB-binding protein
5766869	CN1C2=CC=CC=C2N=C1/C(=C/C3CCC=CC3)/C#N		Potency									15.8489	4.8	4.8	N						907			Confirmation Concentration-Response Assay for Cell signaling CRE-BLA (Fsk stim) - HEK293 CREB Luciferase												CREB-binding protein
6603377	CC1=NC2=C(C(=N1)NC3=CC=C(C=C3)N4CCN(CC4)C(=O)C)OC5=CC=CC=C52.Cl		Potency												N						905			Cell Viability - CRE-beta lactamase CHO cell - 24 hr assay												CREB-binding protein
11128828	CCC1=CC2=C(N1CC3=CC=CC=C3)CCCC2=O														N						1141839			Binding affinity to CREBBP (unknown origin) by thermal shift assay												CREB-binding protein
12726857	C1=CC=C(C=C1)C2=NN3C(=NN=C3C(F)(F)F)C=C2														N						1079730			Binding affinity to CREBBP (unknown origin) at 4 uM by thermal shift assay												CREB-binding protein
13099766	C1=CC2=C(N=C1)SN(C2=O)CC3=CC=C(C=C3)Cl		IC50									1.95	5.70997		A						1119338			Inhibition of KAT3A (1319 to 1710) (unknown origin) using biotinylated histone H3 as substrate after 10 mins by TR-FRET analysis relative to control												CREB-binding protein
13953710	Cc1nnc2C(NC(=O)OCc3ccccc3)N=C(c4ccccc4)c5ccccc5n12	12062982	Kd						>	50000	nM		4.3		N			BAO_0000034	UO_0000065	http://www.openphacts.org/units/Nanomolar	852814	CHEMBL2156121	B	Binding affinity to CREBBP by isothermal titration calorimetric analysis	1	Scientific Literature				Autocuration	BAO_0000357	101310	CHEMBL5747	SINGLE PROTEIN	Q92793	CREB-binding protein	Homo sapiens	8	Homologous protein			65556	CHEMBL2150880	21568322	J. Med. Chem.	2011	54	11	3827
39791103	CN1Cc2cc(ccc2NC1=O)c3c(C)onc3C	6364749	IC50						=	3400	nM		5.47		A			BAO_0000190	UO_0000065	http://www.openphacts.org/units/Nanomolar	770203	CHEMBL1832993	B	Displacement of H3K56Ac from human CREBBP by peptide displacement assay	1	Scientific Literature	Homo sapiens		9606	Autocuration	BAO_0000357	101310	CHEMBL5747	SINGLE PROTEIN	Q92793	CREB-binding protein	Homo sapiens	9	Protein			58989	CHEMBL1828554	21851057	J. Med. Chem.	2011	54	19	6761
44243549	CC(=O)c1cccc(c1)c2c(C)onc2C	6364751	IC50						=	55700	nM		4.25		N			BAO_0000190	UO_0000065	http://www.openphacts.org/units/Nanomolar	770203	CHEMBL1832993	B	Displacement of H3K56Ac from human CREBBP by peptide displacement assay	1	Scientific Literature	Homo sapiens		9606	Autocuration	BAO_0000357	101310	CHEMBL5747	SINGLE PROTEIN	Q92793	CREB-binding protein	Homo sapiens	9	Protein			58989	CHEMBL1828554	21851057	J. Med. Chem.	2011	54	19	6761
44448303	CCCCCCCCCCCCCC=C(C(=O)OCC)C(=O)OCC														A						604032			Inhibition of human recombinant KAT3A expressed in Escherichia coli BL21 using histone H4 peptide as substrate at 50 uM after 2 hrs relative to control												CREB-binding protein
46907787	Cc1sc2c(C(=N[C@@H](CC(=O)OC(C)(C)C)c3nnc(C)n23)c4ccc(Cl)cc4)c1C	8046393	IC50						>	10000	nM		5		A			BAO_0000190	UO_0000065	http://www.openphacts.org/units/Nanomolar	807448	CHEMBL1958570	B	Displacement of acetylated histone peptide from CREBBP by luminescence proximity homogenous assay	1	Scientific Literature				Autocuration	BAO_0000357	101310	CHEMBL5747	SINGLE PROTEIN	Q92793	CREB-binding protein	Homo sapiens	8	Homologous protein			61257	CHEMBL1955852	22316554	Bioorg. Med. Chem.	2012	20	6	1887
49837845	CC1=CC(=C(C=C1N/N=C/2\C=C(C(=O)C=C2N)C)S(=O)(=O)O)C		Kd									19	4.72125	4.72125	N						1119139			Inhibition of CBP bromodomain (unknown origin) by tryptophan fluorescence spectroscopy												CREB-binding protein
53258425	CCCCCCCCCCC=C(C(=O)OCC)C(=O)OCC														A						604032			Inhibition of human recombinant KAT3A expressed in Escherichia coli BL21 using histone H4 peptide as substrate at 50 uM after 2 hrs relative to control												CREB-binding protein
53258426	CCCCCCCCCCCC=C(C(=O)OCC)C(=O)OCC														A						604032			Inhibition of human recombinant KAT3A expressed in Escherichia coli BL21 using histone H4 peptide as substrate at 50 uM after 2 hrs relative to control												CREB-binding protein
53308655	CCOc1cc(cc(c1)c2c(C)onc2C)C(=O)O	6364755	IC50						=	32200	nM		4.49		N			BAO_0000190	UO_0000065	http://www.openphacts.org/units/Nanomolar	770203	CHEMBL1832993	B	Displacement of H3K56Ac from human CREBBP by peptide displacement assay	1	Scientific Literature	Homo sapiens		9606	Autocuration	BAO_0000357	101310	CHEMBL5747	SINGLE PROTEIN	Q92793	CREB-binding protein	Homo sapiens	9	Protein			58989	CHEMBL1828554	21851057	J. Med. Chem.	2011	54	19	6761
54757749	CCOc1cccc(c1)c2c(C)onc2C	6364752	IC50						=	86900	nM		4.06		N			BAO_0000190	UO_0000065	http://www.openphacts.org/units/Nanomolar	770203	CHEMBL1832993	B	Displacement of H3K56Ac from human CREBBP by peptide displacement assay	1	Scientific Literature	Homo sapiens		9606	Autocuration	BAO_0000357	101310	CHEMBL5747	SINGLE PROTEIN	Q92793	CREB-binding protein	Homo sapiens	9	Protein			58989	CHEMBL1828554	21851057	J. Med. Chem.	2011	54	19	6761
54757751	CCOC(=O)c1cc(OCC)cc(c1)c2c(C)onc2C	6364754	IC50						=	49400	nM		4.31		N			BAO_0000190	UO_0000065	http://www.openphacts.org/units/Nanomolar	770203	CHEMBL1832993	B	Displacement of H3K56Ac from human CREBBP by peptide displacement assay	1	Scientific Literature	Homo sapiens		9606	Autocuration	BAO_0000357	101310	CHEMBL5747	SINGLE PROTEIN	Q92793	CREB-binding protein	Homo sapiens	9	Protein			58989	CHEMBL1828554	21851057	J. Med. Chem.	2011	54	19	6761
54757752	CCOc1cc(cc(c1)c2c(C)onc2C)C(=O)C	6364756	IC50						=	12900	nM		4.89		N			BAO_0000190	UO_0000065	http://www.openphacts.org/units/Nanomolar	770203	CHEMBL1832993	B	Displacement of H3K56Ac from human CREBBP by peptide displacement assay	1	Scientific Literature	Homo sapiens		9606	Autocuration	BAO_0000357	101310	CHEMBL5747	SINGLE PROTEIN	Q92793	CREB-binding protein	Homo sapiens	9	Protein			58989	CHEMBL1828554	21851057	J. Med. Chem.	2011	54	19	6761
56659598	CCCCCCCCCCCCCCCCC(=C(C(=O)OCC)C(=O)OCC)O														A						604032			Inhibition of human recombinant KAT3A expressed in Escherichia coli BL21 using histone H4 peptide as substrate at 50 uM after 2 hrs relative to control												CREB-binding protein
56663053	CCCCCCCCCCCCC=C(C(=O)OCC)C(=O)OCC														N						604032			Inhibition of human recombinant KAT3A expressed in Escherichia coli BL21 using histone H4 peptide as substrate at 50 uM after 2 hrs relative to control												CREB-binding protein
56663055	CCCCCCCCCCCCCNC=C(C(=O)OCC)C(=O)OCC														A						604032			Inhibition of human recombinant KAT3A expressed in Escherichia coli BL21 using histone H4 peptide as substrate at 50 uM after 2 hrs relative to control												CREB-binding protein
56666522	CCCCCCCCCCCCCCCC(=C(C(=O)OCC)C(=O)OCC)O														A						604032			Inhibition of human recombinant KAT3A expressed in Escherichia coli BL21 using histone H4 peptide as substrate at 50 uM after 2 hrs relative to control												CREB-binding protein
56666523	CCCCCCCCCCCCCCC=C1C(=O)OC(OC1=O)(C)C														A						604032			Inhibition of human recombinant KAT3A expressed in Escherichia coli BL21 using histone H4 peptide as substrate at 50 uM after 2 hrs relative to control												CREB-binding protein
56673448	CCCCCCCCCCCCCC(=C(C(=O)OCC)C(=O)OCC)C														A						604032			Inhibition of human recombinant KAT3A expressed in Escherichia coli BL21 using histone H4 peptide as substrate at 50 uM after 2 hrs relative to control												CREB-binding protein
56676753	CCCCCCCCCCCCCC(C(=O)OCC)C(=O)OCC														A						604032			Inhibition of human recombinant KAT3A expressed in Escherichia coli BL21 using histone H4 peptide as substrate at 50 uM after 2 hrs relative to control												CREB-binding protein
56676754	CCCCCCCCCCCCCCCC(C(=O)OCC)C(=O)OCC														A						604032			Inhibition of human recombinant KAT3A expressed in Escherichia coli BL21 using histone H4 peptide as substrate at 50 uM after 2 hrs relative to control												CREB-binding protein
56676755	CCCCCCCCCCCCCCC(=C(C(=O)OCC)C(=O)OCC)C														A						604032			Inhibition of human recombinant KAT3A expressed in Escherichia coli BL21 using histone H4 peptide as substrate at 50 uM after 2 hrs relative to control												CREB-binding protein
56683417	CCCCCCCCCCCCCCC(=C(C(=O)OCC)C(=O)OCC)Cl														A						604032			Inhibition of human recombinant KAT3A expressed in Escherichia coli BL21 using histone H4 peptide as substrate at 50 uM after 2 hrs relative to control												CREB-binding protein
56683418	CCCCCCCCCCCCCCCC1C(=O)OC(OC1=O)(C)C														A						604032			Inhibition of human recombinant KAT3A expressed in Escherichia coli BL21 using histone H4 peptide as substrate at 50 uM after 2 hrs relative to control												CREB-binding protein
60171584	CC1=CC(=NNC2=CC=C(C=C2)S(=O)(=O)NC3=CC=CC=N3)C=C(C1=O)C		Ki									7.15	5.14569		A						1054711			Displacement of fluorescein-labeled MS226 from recombinant human CBP bromodomain after 1 hr by fluorescence anisotropy assay												CREB-binding protein
70699440	Cc1onc(C)c1c2cc(O)cc(c2)[C@H](O)c3ccccc3	12679282	IC50						=	1100	nM		5.96		A			BAO_0000190	UO_0000065	http://www.openphacts.org/units/Nanomolar	944373	CHEMBL2344877	B	Binding affinity to CREBBP bromodomain (unknown origin) using H3K56Ac peptide by amplified luminescent proximity homogeneous assay	1	Scientific Literature	Homo sapiens		9606	Autocuration	BAO_0000357	101310	CHEMBL5747	SINGLE PROTEIN	Q92793	CREB-binding protein	Homo sapiens	9	Protein			72697	CHEMBL2331285	23517011	J. Med. Chem.	2013	56	8	3217
71271629	COc1ccccc1S(=O)(=O)Nc2ccc3NC(=O)N(C)Cc3c2	12134082	Kd						=	49000	nM		4.31		N			BAO_0000034	UO_0000065	http://www.openphacts.org/units/Nanomolar	878135	CHEMBL2183680	B	Binding affinity to CREBBP by SPR method	1	Scientific Literature				Autocuration	BAO_0000357	101310	CHEMBL5747	SINGLE PROTEIN	Q92793	CREB-binding protein	Homo sapiens	8	Homologous protein			66670	CHEMBL2177039	23095041	J. Med. Chem.	2012	55	22	9831
71624782	CC(=O)Oc1cc(cc(c1)c2c(C)onc2C)C(O)c3ccccc3	12679288	IC50						=	2480	nM		5.61		A			BAO_0000190	UO_0000065	http://www.openphacts.org/units/Nanomolar	944373	CHEMBL2344877	B	Binding affinity to CREBBP bromodomain (unknown origin) using H3K56Ac peptide by amplified luminescent proximity homogeneous assay	1	Scientific Literature	Homo sapiens		9606	Autocuration	BAO_0000357	101310	CHEMBL5747	SINGLE PROTEIN	Q92793	CREB-binding protein	Homo sapiens	9	Protein			72697	CHEMBL2331285	23517011	J. Med. Chem.	2013	56	8	3217
71624784	CCOc1cc(cc(c1)c2c(C)onc2C)C(O)c3ccccc3	12679287	IC50						=	4100	nM		5.39		A			BAO_0000190	UO_0000065	http://www.openphacts.org/units/Nanomolar	944373	CHEMBL2344877	B	Binding affinity to CREBBP bromodomain (unknown origin) using H3K56Ac peptide by amplified luminescent proximity homogeneous assay	1	Scientific Literature	Homo sapiens		9606	Autocuration	BAO_0000357	101310	CHEMBL5747	SINGLE PROTEIN	Q92793	CREB-binding protein	Homo sapiens	9	Protein			72697	CHEMBL2331285	23517011	J. Med. Chem.	2013	56	8	3217
71624785	CCOc1cc(cc(c1)c2c(C)onc2C)C(O)c3cccc(F)c3	12679285	IC50						=	6300	nM		5.2		A			BAO_0000190	UO_0000065	http://www.openphacts.org/units/Nanomolar	944373	CHEMBL2344877	B	Binding affinity to CREBBP bromodomain (unknown origin) using H3K56Ac peptide by amplified luminescent proximity homogeneous assay	1	Scientific Literature	Homo sapiens		9606	Autocuration	BAO_0000357	101310	CHEMBL5747	SINGLE PROTEIN	Q92793	CREB-binding protein	Homo sapiens	9	Protein			72697	CHEMBL2331285	23517011	J. Med. Chem.	2013	56	8	3217
71624786	CCOc1cc(cc(c1)c2c(C)onc2C)C(O)c3ccc(F)cc3	12679286	IC50						=	8600	nM		5.07		A			BAO_0000190	UO_0000065	http://www.openphacts.org/units/Nanomolar	944373	CHEMBL2344877	B	Binding affinity to CREBBP bromodomain (unknown origin) using H3K56Ac peptide by amplified luminescent proximity homogeneous assay	1	Scientific Literature	Homo sapiens		9606	Autocuration	BAO_0000357	101310	CHEMBL5747	SINGLE PROTEIN	Q92793	CREB-binding protein	Homo sapiens	9	Protein			72697	CHEMBL2331285	23517011	J. Med. Chem.	2013	56	8	3217
71624787	CCOc1cc(cc(c1)c2c(C)onc2C)C(O)c3cccc(Cl)c3	12679283	IC50						=	8500	nM		5.07		A			BAO_0000190	UO_0000065	http://www.openphacts.org/units/Nanomolar	944373	CHEMBL2344877	B	Binding affinity to CREBBP bromodomain (unknown origin) using H3K56Ac peptide by amplified luminescent proximity homogeneous assay	1	Scientific Literature	Homo sapiens		9606	Autocuration	BAO_0000357	101310	CHEMBL5747	SINGLE PROTEIN	Q92793	CREB-binding protein	Homo sapiens	9	Protein			72697	CHEMBL2331285	23517011	J. Med. Chem.	2013	56	8	3217
71624896	CCOc1cc(cc(c1)c2c(C)onc2C)C(O)c3ccc(Cl)cc3	12679284	IC50						=	10800	nM		4.97		N			BAO_0000190	UO_0000065	http://www.openphacts.org/units/Nanomolar	944373	CHEMBL2344877	B	Binding affinity to CREBBP bromodomain (unknown origin) using H3K56Ac peptide by amplified luminescent proximity homogeneous assay	1	Scientific Literature	Homo sapiens		9606	Autocuration	BAO_0000357	101310	CHEMBL5747	SINGLE PROTEIN	Q92793	CREB-binding protein	Homo sapiens	9	Protein			72697	CHEMBL2331285	23517011	J. Med. Chem.	2013	56	8	3217
71624901	COc1cc(cc(c1)c2c(C)onc2C)C(O)c3ccccc3	12679280	IC50						=	3960	nM		5.4		A			BAO_0000190	UO_0000065	http://www.openphacts.org/units/Nanomolar	944373	CHEMBL2344877	B	Binding affinity to CREBBP bromodomain (unknown origin) using H3K56Ac peptide by amplified luminescent proximity homogeneous assay	1	Scientific Literature	Homo sapiens		9606	Autocuration	BAO_0000357	101310	CHEMBL5747	SINGLE PROTEIN	Q92793	CREB-binding protein	Homo sapiens	9	Protein			72697	CHEMBL2331285	23517011	J. Med. Chem.	2013	56	8	3217
71624902	COCCOc1cc(cc(c1)c2c(C)onc2C)C(O)c3ccccc3	12679279	IC50						=	2070	nM		5.68		A			BAO_0000190	UO_0000065	http://www.openphacts.org/units/Nanomolar	944373	CHEMBL2344877	B	Binding affinity to CREBBP bromodomain (unknown origin) using H3K56Ac peptide by amplified luminescent proximity homogeneous assay	1	Scientific Literature	Homo sapiens		9606	Autocuration	BAO_0000357	101310	CHEMBL5747	SINGLE PROTEIN	Q92793	CREB-binding protein	Homo sapiens	9	Protein			72697	CHEMBL2331285	23517011	J. Med. Chem.	2013	56	8	3217
71624903	Cc1onc(C)c1c2cc(OCCO)cc(c2)C(O)c3ccccc3	12679281	IC50						=	2810	nM		5.55		A			BAO_0000190	UO_0000065	http://www.openphacts.org/units/Nanomolar	944373	CHEMBL2344877	B	Binding affinity to CREBBP bromodomain (unknown origin) using H3K56Ac peptide by amplified luminescent proximity homogeneous assay	1	Scientific Literature	Homo sapiens		9606	Autocuration	BAO_0000357	101310	CHEMBL5747	SINGLE PROTEIN	Q92793	CREB-binding protein	Homo sapiens	9	Protein			72697	CHEMBL2331285	23517011	J. Med. Chem.	2013	56	8	3217
73386670	CC1=C/C(=N\NC2=CC=C(C=C2)S(=O)(=O)NC3=CC=CC=N3)/C(=CC1=O)N		Ki									2.18	5.66154		A						1054711			Displacement of fluorescein-labeled MS226 from recombinant human CBP bromodomain after 1 hr by fluorescence anisotropy assay												CREB-binding protein
73386671	CC1=C/C(=N\NC2=CC=C(C=C2)S(=O)(=O)NC3=CC=CC=N3)/C(=C(C1=O)C)N		Ki									5.12	5.29073		A						1054711			Displacement of fluorescein-labeled MS226 from recombinant human CBP bromodomain after 1 hr by fluorescence anisotropy assay												CREB-binding protein
76310219	Cc1nnc2c3ccccc3c(nn12)c4ccc(N5CCOCC5)c(NS(=O)(=O)c6ccccc6Cl)c4	13891623	IC50						=	199.53	nM		6.7		A			BAO_0000190	UO_0000065	http://www.openphacts.org/units/Nanomolar	1287022	CHEMBL3111333	B	Displacement of H3K56(Ac) peptide from CREBBP bromodomain (unknown origin) by AlphaScreen assay	1	Scientific Literature	Homo sapiens		9606	Autocuration	BAO_0000357	101310	CHEMBL5747	SINGLE PROTEIN	Q92793	CREB-binding protein	Homo sapiens	9	Protein			76683	CHEMBL3108763	24313754	J. Med. Chem.	2014	57	2	462
76314856	COC1=CC=C(C=C1)C2=NN3C(=NN=C3C(F)(F)F)C=C2														N						1079730			Binding affinity to CREBBP (unknown origin) at 4 uM by thermal shift assay												CREB-binding protein
76317442	Cc1nnc2c3ccccc3c(nn12)c4ccc(N5CCOCC5)c(NS(=O)(=O)C)c4	13891632	IC50						=	630.96	nM		6.2		A			BAO_0000190	UO_0000065	http://www.openphacts.org/units/Nanomolar	1287022	CHEMBL3111333	B	Displacement of H3K56(Ac) peptide from CREBBP bromodomain (unknown origin) by AlphaScreen assay	1	Scientific Literature	Homo sapiens		9606	Autocuration	BAO_0000357	101310	CHEMBL5747	SINGLE PROTEIN	Q92793	CREB-binding protein	Homo sapiens	9	Protein			76683	CHEMBL3108763	24313754	J. Med. Chem.	2014	57	2	462
76328466	COc1ccc(cc1)S(=O)(=O)Nc2cc(ccc2N3CCN(C)CC3)c4nn5c(C)nnc5c6ccccc46	13891634	IC50						=	794.33	nM		6.1		A			BAO_0000190	UO_0000065	http://www.openphacts.org/units/Nanomolar	1287022	CHEMBL3111333	B	Displacement of H3K56(Ac) peptide from CREBBP bromodomain (unknown origin) by AlphaScreen assay	1	Scientific Literature	Homo sapiens		9606	Autocuration	BAO_0000357	101310	CHEMBL5747	SINGLE PROTEIN	Q92793	CREB-binding protein	Homo sapiens	9	Protein			76683	CHEMBL3108763	24313754	J. Med. Chem.	2014	57	2	462
76329338	CCOC(=O)N(C1=C(C=CC(=C1)C2=NN3C(=NN=C3C(=C2)N)C)C)S(=O)(=O)C4=CC=C(C=C4)Cl														N						1079730			Binding affinity to CREBBP (unknown origin) at 4 uM by thermal shift assay												CREB-binding protein
76331639	CC1=C/C(=N\NC2=CC=C(C=C2)S(=O)(=O)NC3=CC=CC=N3)/C(=C(C1=O)Cl)N		Ki									5.59	5.25259		A						1054711			Displacement of fluorescein-labeled MS226 from recombinant human CBP bromodomain after 1 hr by fluorescence anisotropy assay												CREB-binding protein
76335637	Cc1nnc2c3ccccc3c(nn12)c4ccc(N5CCOCC5)c(NS(=O)(=O)c6ccc(Cl)cc6)c4	13891631	IC50						=	630.96	nM		6.2		A			BAO_0000190	UO_0000065	http://www.openphacts.org/units/Nanomolar	1287022	CHEMBL3111333	B	Displacement of H3K56(Ac) peptide from CREBBP bromodomain (unknown origin) by AlphaScreen assay	1	Scientific Literature	Homo sapiens		9606	Autocuration	BAO_0000357	101310	CHEMBL5747	SINGLE PROTEIN	Q92793	CREB-binding protein	Homo sapiens	9	Protein			76683	CHEMBL3108763	24313754	J. Med. Chem.	2014	57	2	462
90667751	COC1=CC=C(C=C1)CN2C3=CC=CC=C3/C(=C/4\C(=O)N(C(=S)S4)CCCCCC(=O)O)/C2=O		IC50									40.9	4.38828	4.38828	N						1119338			Inhibition of KAT3A (1319 to 1710) (unknown origin) using biotinylated histone H3 as substrate after 10 mins by TR-FRET analysis relative to control												CREB-binding protein
90667752	C1=CC=C2C(=C1)/C(=C/3\C(=O)N(C(=S)S3)CCCCCC(=O)O)/C(=O)N2CC4=CC=C(C=C4)[N+](=O)[O-]		IC50									28.4	4.54668	4.54668	N						1119338			Inhibition of KAT3A (1319 to 1710) (unknown origin) using biotinylated histone H3 as substrate after 10 mins by TR-FRET analysis relative to control												CREB-binding protein
90667754	CC1=CC=C(C=C1)CN2C3=CC=CC=C3/C(=C/4\C(=O)N(C(=S)S4)CCCCCCCC(=O)O)/C2=O		IC50									35.9	4.44491	4.44491	N						1119338			Inhibition of KAT3A (1319 to 1710) (unknown origin) using biotinylated histone H3 as substrate after 10 mins by TR-FRET analysis relative to control												CREB-binding protein
90667755	CC1=CC=C(C=C1)CN2C3=CC=CC=C3/C(=C/4\C(=O)N(C(=S)S4)CC5CCC(CC5)C(=O)O)/C2=O		IC50									38.5	4.41454	4.41454	N						1119338			Inhibition of KAT3A (1319 to 1710) (unknown origin) using biotinylated histone H3 as substrate after 10 mins by TR-FRET analysis relative to control												CREB-binding protein
A470	Cc1cc(N=Nc2ccc(cc2)S(=O)(=O)Nc3ccccn3)c(N)cc1O	13826960	Ki						=	2180	nM		5.66154		A			BAO_0000192	UO_0000065	http://www.openphacts.org/units/Nanomolar	1277430	CHEMBL3089620	B	Displacement of fluorescein-labeled MS226 from recombinant human CBP bromodomain after 1 hr by fluorescence anisotropy assay	1	Scientific Literature	Homo sapiens		9606	Autocuration	BAO_0000357	101310	CHEMBL5747	SINGLE PROTEIN	Q92793	CREB-binding protein	Homo sapiens	9	Protein			76008	CHEMBL3085768	24144283	J. Med. Chem.	2013	56	22	9251
A419	Cc1cc(N=Nc2ccc(cc2)S(=O)(=O)Nc3ccccn3)c(N)c(C)c1O	13826959	Ki						=	5120	nM		5.29073		A			BAO_0000192	UO_0000065	http://www.openphacts.org/units/Nanomolar	1277430	CHEMBL3089620	B	Displacement of fluorescein-labeled MS226 from recombinant human CBP bromodomain after 1 hr by fluorescence anisotropy assay	1	Scientific Literature	Homo sapiens		9606	Autocuration	BAO_0000357	101310	CHEMBL5747	SINGLE PROTEIN	Q92793	CREB-binding protein	Homo sapiens	9	Protein			76008	CHEMBL3085768	24144283	J. Med. Chem.	2013	56	22	9251
A471	Cc1cc(N=Nc2ccc(cc2)S(=O)(=O)Nc3ccccn3)c(N)c(Cl)c1O	13826958	Ki						=	5590	nM		5.25259		A			BAO_0000192	UO_0000065	http://www.openphacts.org/units/Nanomolar	1277430	CHEMBL3089620	B	Displacement of fluorescein-labeled MS226 from recombinant human CBP bromodomain after 1 hr by fluorescence anisotropy assay	1	Scientific Literature	Homo sapiens		9606	Autocuration	BAO_0000357	101310	CHEMBL5747	SINGLE PROTEIN	Q92793	CREB-binding protein	Homo sapiens	9	Protein			76008	CHEMBL3085768	24144283	J. Med. Chem.	2013	56	22	9251
A388	Cc1cc(cc(C)c1O)N=Nc2ccc(cc2)S(=O)(=O)Nc3ccccn3	13826961	Ki						=	7150	nM		5.14569		A			BAO_0000192	UO_0000065	http://www.openphacts.org/units/Nanomolar	1277430	CHEMBL3089620	B	Displacement of fluorescein-labeled MS226 from recombinant human CBP bromodomain after 1 hr by fluorescence anisotropy assay	1	Scientific Literature	Homo sapiens		9606	Autocuration	BAO_0000357	101310	CHEMBL5747	SINGLE PROTEIN	Q92793	CREB-binding protein	Homo sapiens	9	Protein			76008	CHEMBL3085768	24144283	J. Med. Chem.	2013	56	22	9251
A669	Cc1cc(N=Nc2cc(c(C)cc2C)S(=O)(=O)O)c(N)cc1O	14550530	Kd						=	19000	nM		4.72125		N			BAO_0000034	UO_0000065	http://www.openphacts.org/units/Nanomolar	1330660	CHEMBL3222864	B	Inhibition of CBP bromodomain (unknown origin) by tryptophan fluorescence spectroscopy	1	Scientific Literature	Homo sapiens		9606	Autocuration	BAO_0000357	101310	CHEMBL5747	SINGLE PROTEIN	Q92793	CREB-binding protein	Homo sapiens	9	Protein			81839	CHEMBL3217674		MedChemComm	2012	3	2	123
1511198	CNS(=O)(=O)c1cc(ccc1C)c2nn3c(C)nnc3c4ccccc24	13891959	IC50						>	100000	nM		4		N			BAO_0000190	UO_0000065	http://www.openphacts.org/units/Nanomolar	1287020	CHEMBL3111331	B	Displacement of H3K14(Ac) peptide from PB1-5 bromodomain (unknown origin) by AlphaScreen assay	1	Scientific Literature	Homo sapiens		9606	Autocuration	BAO_0000357	104264	CHEMBL1795184	SINGLE PROTEIN	Q86U86	Protein polybromo-1	Homo sapiens	9	Protein			76683	CHEMBL3108763	24313754	J. Med. Chem.	2014	57	2	462
1511199	CN(C)S(=O)(=O)c1cc(ccc1C)c2nn3c(C)nnc3c4ccccc24	13891958	IC50						>	100000	nM		4		N			BAO_0000190	UO_0000065	http://www.openphacts.org/units/Nanomolar	1287020	CHEMBL3111331	B	Displacement of H3K14(Ac) peptide from PB1-5 bromodomain (unknown origin) by AlphaScreen assay	1	Scientific Literature	Homo sapiens		9606	Autocuration	BAO_0000357	104264	CHEMBL1795184	SINGLE PROTEIN	Q86U86	Protein polybromo-1	Homo sapiens	9	Protein			76683	CHEMBL3108763	24313754	J. Med. Chem.	2014	57	2	462
4907545	Cc1ccc(cc1NS(=O)(=O)C)c2nn3c(C)nnc3c4ccccc24	13891957	IC50						>	100000	nM		4		N			BAO_0000190	UO_0000065	http://www.openphacts.org/units/Nanomolar	1287020	CHEMBL3111331	B	Displacement of H3K14(Ac) peptide from PB1-5 bromodomain (unknown origin) by AlphaScreen assay	1	Scientific Literature	Homo sapiens		9606	Autocuration	BAO_0000357	104264	CHEMBL1795184	SINGLE PROTEIN	Q86U86	Protein polybromo-1	Homo sapiens	9	Protein			76683	CHEMBL3108763	24313754	J. Med. Chem.	2014	57	2	462
4908238	CCC(=O)Nc1cc(ccc1C)c2nn3c(C)nnc3c4ccccc24	13891960	IC50						>	100000	nM		4		N			BAO_0000190	UO_0000065	http://www.openphacts.org/units/Nanomolar	1287020	CHEMBL3111331	B	Displacement of H3K14(Ac) peptide from PB1-5 bromodomain (unknown origin) by AlphaScreen assay	1	Scientific Literature	Homo sapiens		9606	Autocuration	BAO_0000357	104264	CHEMBL1795184	SINGLE PROTEIN	Q86U86	Protein polybromo-1	Homo sapiens	9	Protein			76683	CHEMBL3108763	24313754	J. Med. Chem.	2014	57	2	462
615184	C1=CC(=C(C=C1N2C(=O)C=CS2)Cl)F		IC50									4.2	5.37675		A						348157			Inhibition of human recombinant HAT PCAF												Histone acetyltransferase PCAF
2829592	Cl.NCCCCNc1ccccc1[N+](=O)[O-]	14554328	IC50						=	145900	nM		3.84		N	Outside typical range		BAO_0000190	UO_0000065	http://www.openphacts.org/units/Nanomolar	1328180	CHEMBL3227012	B	Inhibition of PCAF bromodomain (unknown origin) assessed as inhibition of PCAF BRD tat-AcK50 peptide interaction by ELISA	1	Scientific Literature	Homo sapiens		9606	Autocuration	BAO_0000357	100875	CHEMBL5500	SINGLE PROTEIN	Q92831	Histone acetyltransferase PCAF	Homo sapiens	9	Protein			82052	CHEMBL3217411		MedChemComm	2013	4	4	737
5276852	[NH3+]CCCNc1ccccc1[N+](=O)[O-]	14550527	IC50						=	5600	nM		5.25		A			BAO_0000190	UO_0000065	http://www.openphacts.org/units/Nanomolar	1330658	CHEMBL3222862	B	Inhibition of PCAF bromodomain (unknown origin)-HIV-Tak50ac interaction	1	Scientific Literature	Homo sapiens		9606	Autocuration	BAO_0000357	100875	CHEMBL5500	SINGLE PROTEIN	Q92831	Histone acetyltransferase PCAF	Homo sapiens	9	Protein			81839	CHEMBL3217674		MedChemComm	2012	3	2	123
9795646	CCCCCCCCCCC1=C(C(=CC=C1)O)C(=O)O		IC50												A						499438			Inhibition of human recombinant histone deacetylase PCAF by ELISA												Histone acetyltransferase PCAF
10360553	CCCCCCCCCCCCCCOC1=CC=CC(=C1C(=O)O)O		IC50												A						499438			Inhibition of human recombinant histone deacetylase PCAF by ELISA												Histone acetyltransferase PCAF
11230373	Cl.Cc1ccc(c(OCCCN)c1)[N+](=O)[O-]	14554323	IC50						=	203600	nM		3.69		N	Outside typical range		BAO_0000190	UO_0000065	http://www.openphacts.org/units/Nanomolar	1328180	CHEMBL3227012	B	Inhibition of PCAF bromodomain (unknown origin) assessed as inhibition of PCAF BRD tat-AcK50 peptide interaction by ELISA	1	Scientific Literature	Homo sapiens		9606	Autocuration	BAO_0000357	100875	CHEMBL5500	SINGLE PROTEIN	Q92831	Histone acetyltransferase PCAF	Homo sapiens	9	Protein			82052	CHEMBL3217411		MedChemComm	2013	4	4	737
11253617	Cl.Cc1cccc(NCCCN)c1[N+](=O)[O-]	14554332	IC50						=	5900	nM		5.23		A			BAO_0000190	UO_0000065	http://www.openphacts.org/units/Nanomolar	1328180	CHEMBL3227012	B	Inhibition of PCAF bromodomain (unknown origin) assessed as inhibition of PCAF BRD tat-AcK50 peptide interaction by ELISA	1	Scientific Literature	Homo sapiens		9606	Autocuration	BAO_0000357	100875	CHEMBL5500	SINGLE PROTEIN	Q92831	Histone acetyltransferase PCAF	Homo sapiens	9	Protein			82052	CHEMBL3217411		MedChemComm	2013	4	4	737
11277137	Cl.NCCCOc1ccc(Cl)cc1[N+](=O)[O-]	14554324	IC50						=	215100	nM		3.67		N	Outside typical range		BAO_0000190	UO_0000065	http://www.openphacts.org/units/Nanomolar	1328180	CHEMBL3227012	B	Inhibition of PCAF bromodomain (unknown origin) assessed as inhibition of PCAF BRD tat-AcK50 peptide interaction by ELISA	1	Scientific Literature	Homo sapiens		9606	Autocuration	BAO_0000357	100875	CHEMBL5500	SINGLE PROTEIN	Q92831	Histone acetyltransferase PCAF	Homo sapiens	9	Protein			82052	CHEMBL3217411		MedChemComm	2013	4	4	737
11288052	Cl.Cc1ccc(c(NCCCN)c1)[N+](=O)[O-]	14554331	IC50						=	10800	nM		4.97		N			BAO_0000190	UO_0000065	http://www.openphacts.org/units/Nanomolar	1328180	CHEMBL3227012	B	Inhibition of PCAF bromodomain (unknown origin) assessed as inhibition of PCAF BRD tat-AcK50 peptide interaction by ELISA	1	Scientific Literature	Homo sapiens		9606	Autocuration	BAO_0000357	100875	CHEMBL5500	SINGLE PROTEIN	Q92831	Histone acetyltransferase PCAF	Homo sapiens	9	Protein			82052	CHEMBL3217411		MedChemComm	2013	4	4	737
11345613	Cl.Cc1ccc(OCCCN)c(c1)[N+](=O)[O-]	14554326	IC50						=	180000	nM		3.74		N	Outside typical range		BAO_0000190	UO_0000065	http://www.openphacts.org/units/Nanomolar	1328180	CHEMBL3227012	B	Inhibition of PCAF bromodomain (unknown origin) assessed as inhibition of PCAF BRD tat-AcK50 peptide interaction by ELISA	1	Scientific Literature	Homo sapiens		9606	Autocuration	BAO_0000357	100875	CHEMBL5500	SINGLE PROTEIN	Q92831	Histone acetyltransferase PCAF	Homo sapiens	9	Protein			82052	CHEMBL3217411		MedChemComm	2013	4	4	737
11357323	Cl.NCCCNc1ccc(cc1[N+](=O)[O-])C#N	14554330	IC50						=	34900	nM		4.46		N			BAO_0000190	UO_0000065	http://www.openphacts.org/units/Nanomolar	1328180	CHEMBL3227012	B	Inhibition of PCAF bromodomain (unknown origin) assessed as inhibition of PCAF BRD tat-AcK50 peptide interaction by ELISA	1	Scientific Literature	Homo sapiens		9606	Autocuration	BAO_0000357	100875	CHEMBL5500	SINGLE PROTEIN	Q92831	Histone acetyltransferase PCAF	Homo sapiens	9	Protein			82052	CHEMBL3217411		MedChemComm	2013	4	4	737
11379279	Cl.NCCCOc1ccccc1[N+](=O)[O-]	14554327	IC50						=	125600	nM		3.9		N	Outside typical range		BAO_0000190	UO_0000065	http://www.openphacts.org/units/Nanomolar	1328180	CHEMBL3227012	B	Inhibition of PCAF bromodomain (unknown origin) assessed as inhibition of PCAF BRD tat-AcK50 peptide interaction by ELISA	1	Scientific Literature	Homo sapiens		9606	Autocuration	BAO_0000357	100875	CHEMBL5500	SINGLE PROTEIN	Q92831	Histone acetyltransferase PCAF	Homo sapiens	9	Protein			82052	CHEMBL3217411		MedChemComm	2013	4	4	737
11380016	Cl.COc1ccc(OCCCN)c(c1)[N+](=O)[O-]	14554325	IC50						=	102700	nM		3.99		N	Outside typical range		BAO_0000190	UO_0000065	http://www.openphacts.org/units/Nanomolar	1328180	CHEMBL3227012	B	Inhibition of PCAF bromodomain (unknown origin) assessed as inhibition of PCAF BRD tat-AcK50 peptide interaction by ELISA	1	Scientific Literature	Homo sapiens		9606	Autocuration	BAO_0000357	100875	CHEMBL5500	SINGLE PROTEIN	Q92831	Histone acetyltransferase PCAF	Homo sapiens	9	Protein			82052	CHEMBL3217411		MedChemComm	2013	4	4	737
11390927	Cl.Cc1ccc(cc1NCCCN)[N+](=O)[O-]	14554329	IC50						=	77800	nM		4.11		N			BAO_0000190	UO_0000065	http://www.openphacts.org/units/Nanomolar	1328180	CHEMBL3227012	B	Inhibition of PCAF bromodomain (unknown origin) assessed as inhibition of PCAF BRD tat-AcK50 peptide interaction by ELISA	1	Scientific Literature	Homo sapiens		9606	Autocuration	BAO_0000357	100875	CHEMBL5500	SINGLE PROTEIN	Q92831	Histone acetyltransferase PCAF	Homo sapiens	9	Protein			82052	CHEMBL3217411		MedChemComm	2013	4	4	737
11402704	Cl.CCc1ccc(NCCCN)c(c1)[N+](=O)[O-]	14554333	IC50						=	7200	nM		5.14		A			BAO_0000190	UO_0000065	http://www.openphacts.org/units/Nanomolar	1328180	CHEMBL3227012	B	Inhibition of PCAF bromodomain (unknown origin) assessed as inhibition of PCAF BRD tat-AcK50 peptide interaction by ELISA	1	Scientific Literature	Homo sapiens		9606	Autocuration	BAO_0000357	100875	CHEMBL5500	SINGLE PROTEIN	Q92831	Histone acetyltransferase PCAF	Homo sapiens	9	Protein			82052	CHEMBL3217411		MedChemComm	2013	4	4	737
11436521	Cl.Cc1ccc(NCCCN)c(c1)[N+](=O)[O-]	14554334	IC50						=	1600	nM		5.8		A			BAO_0000190	UO_0000065	http://www.openphacts.org/units/Nanomolar	1328180	CHEMBL3227012	B	Inhibition of PCAF bromodomain (unknown origin) assessed as inhibition of PCAF BRD tat-AcK50 peptide interaction by ELISA	1	Scientific Literature	Homo sapiens		9606	Autocuration	BAO_0000357	100875	CHEMBL5500	SINGLE PROTEIN	Q92831	Histone acetyltransferase PCAF	Homo sapiens	9	Protein			82052	CHEMBL3217411		MedChemComm	2013	4	4	737
11574136	CCCCCCCCCCCCCCCC1=CC(=CC(=C1C(=O)O)O)O		IC50												A						499438			Inhibition of human recombinant histone deacetylase PCAF by ELISA												Histone acetyltransferase PCAF
19425177	COC(=O)CCCN1C(=O)C=C(S1)Cl		IC50									2.5	5.60206		A						348157			Inhibition of human recombinant HAT PCAF												Histone acetyltransferase PCAF
42609916	COC(=O)CCN1C(=O)C=C(S1)Cl		IC50									1.8	5.74473		A						348157			Inhibition of human recombinant HAT PCAF												Histone acetyltransferase PCAF
42609917	COC(=O)CCN1C(=O)C=C(S1=O)Cl		IC50									5.6	5.25181		A						348157			Inhibition of human recombinant HAT PCAF												Histone acetyltransferase PCAF
42609918	COC(=O)CCN1C(=O)C(=C(S1)Cl)NC(=O)OCC2=CC=CC=C2		IC50									4.9	5.3098		A						348157			Inhibition of human recombinant HAT PCAF												Histone acetyltransferase PCAF
44564426	CCCCCN1C(=O)C=C(S1)Cl		IC50									2.9	5.5376		A						348157			Inhibition of human recombinant HAT PCAF												Histone acetyltransferase PCAF
44564427	COC(=O)CN1C(=O)C=C(S1)Cl		IC50									2.9	5.5376		A						348157			Inhibition of human recombinant HAT PCAF												Histone acetyltransferase PCAF
44564428	COC(=O)CCCCN1C(=O)C=C(S1)Cl		IC50									2.8	5.55284		A						348157			Inhibition of human recombinant HAT PCAF												Histone acetyltransferase PCAF
44564429	COC(=O)CCCCCN1C(=O)C=C(S1)Cl		IC50									3.2	5.49485		A						348157			Inhibition of human recombinant HAT PCAF												Histone acetyltransferase PCAF
44564430	CCOC(=O)CCN1C(=O)C=C(S1)Cl		IC50									2	5.69897		A						348157			Inhibition of human recombinant HAT PCAF												Histone acetyltransferase PCAF
44564431	C1=CC(=C(C=C1N2C(=O)C=C(S2)Cl)Cl)F		IC50									2.5	5.60206		A						348157			Inhibition of human recombinant HAT PCAF												Histone acetyltransferase PCAF
44564432	C1=CC=C(C=C1)COC(=O)NCCN2C(=O)C=C(S2)Cl		IC50									2.6	5.58503		A						348157			Inhibition of human recombinant HAT PCAF												Histone acetyltransferase PCAF
49863979	COC1=CC=CC=C1OCCCC2=C(C(=CC=C2)O)C(=O)O		IC50												A						499438			Inhibition of human recombinant histone deacetylase PCAF by ELISA												Histone acetyltransferase PCAF
49863980	CCCCCCCCCCC1=CC(=CC(=C1C(=O)O)O)O		IC50												A						499438			Inhibition of human recombinant histone deacetylase PCAF by ELISA												Histone acetyltransferase PCAF
49864204	CCCCCCCC1=CC=C(C=C1)CCC2=C(C(=CC=C2)O)C(=O)O		IC50												A						499438			Inhibition of human recombinant histone deacetylase PCAF by ELISA												Histone acetyltransferase PCAF
49864205	CCCCCOC1=CC=C(C=C1)CCC2=C(C(=CC=C2)O)C(=O)O		IC50												A						499438			Inhibition of human recombinant histone deacetylase PCAF by ELISA												Histone acetyltransferase PCAF
53258302	CCCCCCCCCCCCCCC=C(C(=O)C)C(=O)C														A						604034			Inhibition of human recombinant KAT2B using histone H4 peptide as substrate at 50 uM after 2 hrs												Histone acetyltransferase PCAF
53258425	CCCCCCCCCCC=C(C(=O)OCC)C(=O)OCC														A						604034			Inhibition of human recombinant KAT2B using histone H4 peptide as substrate at 50 uM after 2 hrs												Histone acetyltransferase PCAF
53258426	CCCCCCCCCCCC=C(C(=O)OCC)C(=O)OCC														A						604034			Inhibition of human recombinant KAT2B using histone H4 peptide as substrate at 50 uM after 2 hrs												Histone acetyltransferase PCAF
56663053	CCCCCCCCCCCCC=C(C(=O)OCC)C(=O)OCC														A						604034			Inhibition of human recombinant KAT2B using histone H4 peptide as substrate at 50 uM after 2 hrs												Histone acetyltransferase PCAF
56666522	CCCCCCCCCCCCCCCC(=C(C(=O)OCC)C(=O)OCC)O														A						604034			Inhibition of human recombinant KAT2B using histone H4 peptide as substrate at 50 uM after 2 hrs												Histone acetyltransferase PCAF
56666523	CCCCCCCCCCCCCCC=C1C(=O)OC(OC1=O)(C)C														A						604034			Inhibition of human recombinant KAT2B using histone H4 peptide as substrate at 50 uM after 2 hrs												Histone acetyltransferase PCAF
56676753	CCCCCCCCCCCCCC(C(=O)OCC)C(=O)OCC														A						604034			Inhibition of human recombinant KAT2B using histone H4 peptide as substrate at 50 uM after 2 hrs												Histone acetyltransferase PCAF
56683418	CCCCCCCCCCCCCCCC1C(=O)OC(OC1=O)(C)C														A						604034			Inhibition of human recombinant KAT2B using histone H4 peptide as substrate at 50 uM after 2 hrs												Histone acetyltransferase PCAF
73386670	CC1=C/C(=N\NC2=CC=C(C=C2)S(=O)(=O)NC3=CC=CC=N3)/C(=CC1=O)N		Ki									5.52	5.25806		A						1054710			Displacement of fluorescein-labeled MS239 from recombinant human PCAF after 1 hr by fluorescence anisotropy assay												Histone acetyltransferase PCAF
73386671	CC1=C/C(=N\NC2=CC=C(C=C2)S(=O)(=O)NC3=CC=CC=N3)/C(=C(C1=O)C)N		Ki									3.34	5.47625		A						1054710			Displacement of fluorescein-labeled MS239 from recombinant human PCAF after 1 hr by fluorescence anisotropy assay												Histone acetyltransferase PCAF
76313729	C[C@H]([C@@H](C(=O)NCC(=O)NCC(=O)N[C@@H](CCCCN=[N+]=[N-])C(=O)N[C@@H](C)C(=O)N1CCC[C@H]1C(=O)N[C@@H](CCCN=C(N)N)C(=O)N[C@@H](CCCCN)C(=O)N)NC(=O)[C@H](COP(=O)(O)O)NC(=O)[C@H](CCCCN)NC(=O)[C@H](CCCN=C(N)N)NC(=O)[C@H](C)NC(=O)C)O														N						1061975			Inhibition of PCAF (unknown origin) using histone H3 derived peptide as substrate at 10'-6 to 10'-3 M after 20 mins by fluorescence assay												Histone acetyltransferase PCAF
76324619	C[C@H]([C@@H](C(=O)NCC(=O)NCC(=O)N[C@@H](CCCCN=[N+]=[N-])C(=O)N[C@@H](C)C(=O)N1CCC[C@H]1C(=O)N[C@@H](CCCN=C(N)N)C(=O)N[C@@H](CCCCN)C(=O)N)NC(=O)[C@H](CO)NC(=O)[C@H](CCCCN)NC(=O)[C@H](CCCN=C(N)N)NC(=O)[C@H](C)NC(=O)C)O														N						1061975			Inhibition of PCAF (unknown origin) using histone H3 derived peptide as substrate at 10'-6 to 10'-3 M after 20 mins by fluorescence assay												Histone acetyltransferase PCAF
76331639	CC1=C/C(=N\NC2=CC=C(C=C2)S(=O)(=O)NC3=CC=CC=N3)/C(=C(C1=O)Cl)N		Ki									3.34	5.47625		A						1054710			Displacement of fluorescein-labeled MS239 from recombinant human PCAF after 1 hr by fluorescence anisotropy assay												Histone acetyltransferase PCAF
76331863	CC(C)(COP(=O)(O)OP(=O)(O)OC[C@@H]1[C@H]([C@H]([C@@H](O1)N2C=NC3=C2N=CN=C3N)O)OP(=O)(O)O)[C@@H](C(=O)NCCC(=O)NCCSCC#C)O														N						1061975			Inhibition of PCAF (unknown origin) using histone H3 derived peptide as substrate at 10'-6 to 10'-3 M after 20 mins by fluorescence assay												Histone acetyltransferase PCAF
A1	C[C@H]([C@@H](C(=O)NCC(=O)NCC(=O)N[C@@H](CCCCN1C=C(N=N1)CSCCNC(=O)CCNC(=O)[C@H](C(C)(C)COP(=O)(O)OP(=O)(O)OC[C@@H]2[C@H]([C@H]([C@@H](O2)N3C=NC4=C3N=CN=C4N)O)OP(=O)(O)O)O)C(=O)N[C@@H](C)C(=O)N5CCC[C@H]5C(=O)N[C@@H](CCCN=C(N)N)C(=O)N[C@@H](CCCCN)C(=O)N)NC(=O)[C@H](COP(=O)(O)O)NC(=O)[C@H](CCCCN)NC(=O)[C@H](CCCN=C(N)N)NC(=O)[C@H](C)NC(=O)C)O		IC50									33	4.48149	4.48149	N						1061974			Competitive inhibition of PCAF (unknown origin) using histone H3 derived peptide as substrate after 20 mins by fluorescence assay												Histone acetyltransferase PCAF
A471	Cc1cc(N=Nc2ccc(cc2)S(=O)(=O)Nc3ccccn3)c(N)c(Cl)c1O	13826955	Ki						<	3340	nM		5.47625		A			BAO_0000192	UO_0000065	http://www.openphacts.org/units/Nanomolar	1277429	CHEMBL3089619	B	Displacement of fluorescein-labeled MS239 from recombinant human PCAF after 1 hr by fluorescence anisotropy assay	1	Scientific Literature	Homo sapiens		9606	Autocuration	BAO_0000357	100875	CHEMBL5500	SINGLE PROTEIN	Q92831	Histone acetyltransferase PCAF	Homo sapiens	9	Protein			76008	CHEMBL3085768	24144283	J. Med. Chem.	2013	56	22	9251
A419	Cc1cc(N=Nc2ccc(cc2)S(=O)(=O)Nc3ccccn3)c(N)c(C)c1O	13826956	Ki						<	3340	nM		5.47625		A			BAO_0000192	UO_0000065	http://www.openphacts.org/units/Nanomolar	1277429	CHEMBL3089619	B	Displacement of fluorescein-labeled MS239 from recombinant human PCAF after 1 hr by fluorescence anisotropy assay	1	Scientific Literature	Homo sapiens		9606	Autocuration	BAO_0000357	100875	CHEMBL5500	SINGLE PROTEIN	Q92831	Histone acetyltransferase PCAF	Homo sapiens	9	Protein			76008	CHEMBL3085768	24144283	J. Med. Chem.	2013	56	22	9251
A470	Cc1cc(N=Nc2ccc(cc2)S(=O)(=O)Nc3ccccn3)c(N)cc1O	13826957	Ki						=	5520	nM		5.25806		A			BAO_0000192	UO_0000065	http://www.openphacts.org/units/Nanomolar	1277429	CHEMBL3089619	B	Displacement of fluorescein-labeled MS239 from recombinant human PCAF after 1 hr by fluorescence anisotropy assay	1	Scientific Literature	Homo sapiens		9606	Autocuration	BAO_0000357	100875	CHEMBL5500	SINGLE PROTEIN	Q92831	Histone acetyltransferase PCAF	Homo sapiens	9	Protein			76008	CHEMBL3085768	24144283	J. Med. Chem.	2013	56	22	9251
A919	C[C@H]([C@@H](C(=O)NCC(=O)NCC(=O)N[C@@H](CCCCN1C=C(N=N1)CSCCNC(=O)CCNC(=O)[C@H](C(C)(C)COP(=O)(O)OP(=O)(O)OC[C@@H]2[C@H]([C@H]([C@@H](O2)N3C=NC4=C3N=CN=C4N)O)OP(=O)(O)O)O)C(=O)N[C@@H](C)C(=O)N5CCC[C@H]5C(=O)N[C@@H](CCCN=C(N)N)C(=O)N[C@@H](CCCCN)C(=O)N)NC(=O)[C@H](CO)NC(=O)[C@H](CCCCN)NC(=O)[C@H](CCCN=C(N)N)NC(=O)[C@H](C)NC(=O)C)O		IC50									2.8	5.55284		A						1061976			Inhibition of PCAF (unknown origin) using histone H3 derived peptide as substrate after 20 mins by fluorescence assay												Histone acetyltransferase PCAF
2824992	CN1C(=O)CC(NC2=CC=CC=C21)C3=CC=CC=C3														N						1141843			Binding affinity to SMARCA4 (unknown origin) by thermal shift assay												Transcription activator BRG1
11128828	CCC1=CC2=C(N1CC3=CC=CC=C3)CCCC2=O														N						1141843			Binding affinity to SMARCA4 (unknown origin) by thermal shift assay												Transcription activator BRG1
60171584	CC1=CC(=NNC2=CC=C(C=C2)S(=O)(=O)NC3=CC=CC=N3)C=C(C1=O)C		Ki									6.56	5.1831		A						1054706			Displacement of fluorescein-labeled MS239 from recombinant human SMARCA4 bromodomain after 1 hr by fluorescence anisotropy assay												Transcription activator BRG1
73386670	CC1=C/C(=N\NC2=CC=C(C=C2)S(=O)(=O)NC3=CC=CC=N3)/C(=CC1=O)N		Ki									7.97	5.09854		A						1054706			Displacement of fluorescein-labeled MS239 from recombinant human SMARCA4 bromodomain after 1 hr by fluorescence anisotropy assay												Transcription activator BRG1
73386671	CC1=C/C(=N\NC2=CC=C(C=C2)S(=O)(=O)NC3=CC=CC=N3)/C(=C(C1=O)C)N		Ki									6.56	5.1831		A						1054706			Displacement of fluorescein-labeled MS239 from recombinant human SMARCA4 bromodomain after 1 hr by fluorescence anisotropy assay												Transcription activator BRG1
76331639	CC1=C/C(=N\NC2=CC=C(C=C2)S(=O)(=O)NC3=CC=CC=N3)/C(=C(C1=O)Cl)N		Ki									6.56	5.1831		A						1054706			Displacement of fluorescein-labeled MS239 from recombinant human SMARCA4 bromodomain after 1 hr by fluorescence anisotropy assay												Transcription activator BRG1
A471	Cc1cc(N=Nc2ccc(cc2)S(=O)(=O)Nc3ccccn3)c(N)c(Cl)c1O	13826941	Ki						<	6560	nM		5.1831		A			BAO_0000192	UO_0000065	http://www.openphacts.org/units/Nanomolar	1277425	CHEMBL3089615	B	Displacement of fluorescein-labeled MS239 from recombinant human SMARCA4 bromodomain after 1 hr by fluorescence anisotropy assay	1	Scientific Literature	Homo sapiens		9606	Autocuration	BAO_0000357	107968	CHEMBL3085620	SINGLE PROTEIN	P51532	Transcription activator BRG1	Homo sapiens	9	Protein			76008	CHEMBL3085768	24144283	J. Med. Chem.	2013	56	22	9251
A419	Cc1cc(N=Nc2ccc(cc2)S(=O)(=O)Nc3ccccn3)c(N)c(C)c1O	13826942	Ki						<	6560	nM		5.1831		A			BAO_0000192	UO_0000065	http://www.openphacts.org/units/Nanomolar	1277425	CHEMBL3089615	B	Displacement of fluorescein-labeled MS239 from recombinant human SMARCA4 bromodomain after 1 hr by fluorescence anisotropy assay	1	Scientific Literature	Homo sapiens		9606	Autocuration	BAO_0000357	107968	CHEMBL3085620	SINGLE PROTEIN	P51532	Transcription activator BRG1	Homo sapiens	9	Protein			76008	CHEMBL3085768	24144283	J. Med. Chem.	2013	56	22	9251
A388	Cc1cc(cc(C)c1O)N=Nc2ccc(cc2)S(=O)(=O)Nc3ccccn3	13826944	Ki						<	6560	nM		5.1831		A			BAO_0000192	UO_0000065	http://www.openphacts.org/units/Nanomolar	1277425	CHEMBL3089615	B	Displacement of fluorescein-labeled MS239 from recombinant human SMARCA4 bromodomain after 1 hr by fluorescence anisotropy assay	1	Scientific Literature	Homo sapiens		9606	Autocuration	BAO_0000357	107968	CHEMBL3085620	SINGLE PROTEIN	P51532	Transcription activator BRG1	Homo sapiens	9	Protein			76008	CHEMBL3085768	24144283	J. Med. Chem.	2013	56	22	9251
A470	Cc1cc(N=Nc2ccc(cc2)S(=O)(=O)Nc3ccccn3)c(N)cc1O	13826943	Ki						=	7970	nM		5.09854		A			BAO_0000192	UO_0000065	http://www.openphacts.org/units/Nanomolar	1277425	CHEMBL3089615	B	Displacement of fluorescein-labeled MS239 from recombinant human SMARCA4 bromodomain after 1 hr by fluorescence anisotropy assay	1	Scientific Literature	Homo sapiens		9606	Autocuration	BAO_0000357	107968	CHEMBL3085620	SINGLE PROTEIN	P51532	Transcription activator BRG1	Homo sapiens	9	Protein			76008	CHEMBL3085768	24144283	J. Med. Chem.	2013	56	22	9251
2824992	CN1C(=O)CC(NC2=CC=CC=C21)C3=CC=CC=C3														N						1141842			Binding affinity to TAF1(2) (unknown origin) by thermal shift assay												TAF1
11128828	CCC1=CC2=C(N1CC3=CC=CC=C3)CCCC2=O														N						1141842			Binding affinity to TAF1(2) (unknown origin) by thermal shift assay												TAF1
1511198	CNS(=O)(=O)c1cc(ccc1C)c2nn3c(C)nnc3c4ccccc24	13891955	IC50						>	100000	nM		4		N			BAO_0000190	UO_0000065	http://www.openphacts.org/units/Nanomolar	1287019	CHEMBL3111330	B	Displacement of H3K14(Ac) peptide from TIF1alpha bromodomain (unknown origin) by AlphaScreen assay	1	Scientific Literature	Homo sapiens		9606	Autocuration	BAO_0000357	107998	CHEMBL3108638	SINGLE PROTEIN	O15164	Transcription intermediary factor 1-alpha	Homo sapiens	9	Protein			76683	CHEMBL3108763	24313754	J. Med. Chem.	2014	57	2	462
1511199	CN(C)S(=O)(=O)c1cc(ccc1C)c2nn3c(C)nnc3c4ccccc24	13891954	IC50						>	100000	nM		4		N			BAO_0000190	UO_0000065	http://www.openphacts.org/units/Nanomolar	1287019	CHEMBL3111330	B	Displacement of H3K14(Ac) peptide from TIF1alpha bromodomain (unknown origin) by AlphaScreen assay	1	Scientific Literature	Homo sapiens		9606	Autocuration	BAO_0000357	107998	CHEMBL3108638	SINGLE PROTEIN	O15164	Transcription intermediary factor 1-alpha	Homo sapiens	9	Protein			76683	CHEMBL3108763	24313754	J. Med. Chem.	2014	57	2	462
4907545	Cc1ccc(cc1NS(=O)(=O)C)c2nn3c(C)nnc3c4ccccc24	13891953	IC50						>	100000	nM		4		N			BAO_0000190	UO_0000065	http://www.openphacts.org/units/Nanomolar	1287019	CHEMBL3111330	B	Displacement of H3K14(Ac) peptide from TIF1alpha bromodomain (unknown origin) by AlphaScreen assay	1	Scientific Literature	Homo sapiens		9606	Autocuration	BAO_0000357	107998	CHEMBL3108638	SINGLE PROTEIN	O15164	Transcription intermediary factor 1-alpha	Homo sapiens	9	Protein			76683	CHEMBL3108763	24313754	J. Med. Chem.	2014	57	2	462
4908238	CCC(=O)Nc1cc(ccc1C)c2nn3c(C)nnc3c4ccccc24	13891956	IC50						>	100000	nM		4		N			BAO_0000190	UO_0000065	http://www.openphacts.org/units/Nanomolar	1287019	CHEMBL3111330	B	Displacement of H3K14(Ac) peptide from TIF1alpha bromodomain (unknown origin) by AlphaScreen assay	1	Scientific Literature	Homo sapiens		9606	Autocuration	BAO_0000357	107998	CHEMBL3108638	SINGLE PROTEIN	O15164	Transcription intermediary factor 1-alpha	Homo sapiens	9	Protein			76683	CHEMBL3108763	24313754	J. Med. Chem.	2014	57	2	462
12726857	C1=CC=C(C=C1)C2=NN3C(=NN=C3C(F)(F)F)C=C2														N						1079728			Binding affinity to TIF1 (unknown origin) at 4 uM by thermal shift assay												Transcription intermediary factor 1-alpha
76310219	Cc1nnc2c3ccccc3c(nn12)c4ccc(N5CCOCC5)c(NS(=O)(=O)c6ccccc6Cl)c4	13891599	Inhibition						<	30	%		3.93305	50	N			BAO_0000201	UO_0000187	http://qudt.org/vocab/unit#Percent	1286958	CHEMBL3111123	B	Displacement of H3K14(Ac) peptide from TIF1alpha bromodomain (unknown origin) at 50 uM by AlphaScreen assay relative to control	1	Scientific Literature	Homo sapiens		9606	Autocuration	BAO_0000357	107998	CHEMBL3108638	SINGLE PROTEIN	O15164	Transcription intermediary factor 1-alpha	Homo sapiens	9	Protein			76683	CHEMBL3108763	24313754	J. Med. Chem.	2014	57	2	462
76314856	COC1=CC=C(C=C1)C2=NN3C(=NN=C3C(F)(F)F)C=C2														N						1079728			Binding affinity to TIF1 (unknown origin) at 4 uM by thermal shift assay												Transcription intermediary factor 1-alpha
76317442	Cc1nnc2c3ccccc3c(nn12)c4ccc(N5CCOCC5)c(NS(=O)(=O)C)c4	13891600	Inhibition						<	30	%		3.93305	50	N			BAO_0000201	UO_0000187	http://qudt.org/vocab/unit#Percent	1286958	CHEMBL3111123	B	Displacement of H3K14(Ac) peptide from TIF1alpha bromodomain (unknown origin) at 50 uM by AlphaScreen assay relative to control	1	Scientific Literature	Homo sapiens		9606	Autocuration	BAO_0000357	107998	CHEMBL3108638	SINGLE PROTEIN	O15164	Transcription intermediary factor 1-alpha	Homo sapiens	9	Protein			76683	CHEMBL3108763	24313754	J. Med. Chem.	2014	57	2	462
76328466	COc1ccc(cc1)S(=O)(=O)Nc2cc(ccc2N3CCN(C)CC3)c4nn5c(C)nnc5c6ccccc46	13891597	Inhibition						<	30	%		3.93305	50	N			BAO_0000201	UO_0000187	http://qudt.org/vocab/unit#Percent	1286958	CHEMBL3111123	B	Displacement of H3K14(Ac) peptide from TIF1alpha bromodomain (unknown origin) at 50 uM by AlphaScreen assay relative to control	1	Scientific Literature	Homo sapiens		9606	Autocuration	BAO_0000357	107998	CHEMBL3108638	SINGLE PROTEIN	O15164	Transcription intermediary factor 1-alpha	Homo sapiens	9	Protein			76683	CHEMBL3108763	24313754	J. Med. Chem.	2014	57	2	462
76329338	CCOC(=O)N(C1=C(C=CC(=C1)C2=NN3C(=NN=C3C(=C2)N)C)C)S(=O)(=O)C4=CC=C(C=C4)Cl														N						1079728			Binding affinity to TIF1 (unknown origin) at 4 uM by thermal shift assay												Transcription intermediary factor 1-alpha
76335637	Cc1nnc2c3ccccc3c(nn12)c4ccc(N5CCOCC5)c(NS(=O)(=O)c6ccc(Cl)cc6)c4	13891598	Inhibition						<	30	%		3.93305	50	N			BAO_0000201	UO_0000187	http://qudt.org/vocab/unit#Percent	1286958	CHEMBL3111123	B	Displacement of H3K14(Ac) peptide from TIF1alpha bromodomain (unknown origin) at 50 uM by AlphaScreen assay relative to control	1	Scientific Literature	Homo sapiens		9606	Autocuration	BAO_0000357	107998	CHEMBL3108638	SINGLE PROTEIN	O15164	Transcription intermediary factor 1-alpha	Homo sapiens	9	Protein			76683	CHEMBL3108763	24313754	J. Med. Chem.	2014	57	2	462
M264	n1c2c(cnc1N(C)C)C(=O)N(C)C=C2		IC50						=	48900	nM	48.9	4.31069		N
M268	O=C(c1ccc(cc1)C1=CN(C(=O)C(=C1)C)C)N		IC50						=	9338	nM	9.338	5.02975		A
M254	N1(C(=O)C(=CC(=C1)c1ccc(cc1)CN(C)C)C)C		IC50						=	1147	nM	1.147	5.94044		A
M249	N(Cc1c(cc(cc1)C1=CN(C(=O)C(=C1)C)C)OC)(C)C		IC50						=	470	nM	0.47	6.3279		A
M260	N1(C=C(c2cc(c(c(c2)OC)CN(C)C)OC)C=C(C1=O)C)C		IC50						=	54	nM	0.054	7.26761		A
M261	N1(C=C(c2cc(c(c(c2)OC)CN(C)C)C)C=C(C1=O)C)C		IC50						=	656	nM	0.656	6.1831		A
M250	N(Cc1c(cc(c(c1)OC)C1=CN(C(=O)C(=C1)C)C)OC)(C)C		IC50						=	468	nM	0.468	6.32975		A
M265	N1(C=C(c2cc(c(c(c2)OC)CN2CC(C2)O)OC)C=C(C1=O)C)C		IC50						=	21	nM	0.021	7.67778		A
M266	N1(Cc2c(cc(cc2OC)C2=CN(C(=O)C(=C2)C)C)OC)CC(C1)N		IC50						=	9	nM	0.009	8.04576		A
M253	N1(C(=C(c2cc(c(c(c2)OC)CN(C)C)OC)C=C(C1=O)C)C)C		IC50						=	57	nM	0.057	7.24413		A
M263	N1(C=C(c2cc(c(c(c2)OC)CN(C)C)OC)C(=C(C1=O)C)C)C		IC50						=	37	nM	0.037	7.4318		A
M255	N1(C(=O)c2c(cccc2)C(=C1)c1cc(c(c(c1)OC)CN(C)C)OC)C		IC50						=	30	nM	0.03	7.52288		A
M259	N1(C=C(c2c(nccc2)C1=O)c1cc(c(c(c1)OC)CN(C)C)OC)C		IC50						=	250	nM	0.25	6.60206		A
M267	n1cc2c(cc1)C(=CN(C2=O)C)c1cc(c(c(c1)OC)CN(C)C)OC		IC50						=	19	nM	0.019	7.72125		A
M258	N1(C=C(c2c(ccnc2)C1=O)c1cc(c(c(c1)OC)CN(C)C)OC)C		IC50						=	128	nM	0.128	6.89279		A
M257	N1(C=C(c2c(cccn2)C1=O)c1cc(c(c(c1)OC)CN(C)C)OC)C		IC50						=	134	nM	0.134	6.8729		A
M269	n1cncc2c1C(=CN(C2=O)C)c1cc(c(c(c1)OC)CN(C)C)OC		IC50						=	37	nM	0.037	7.4318		A
M251	N(Cc1c(cc(c(c1)OC)C1=C(N(C(=O)C(=C1)C)C)C)OC)(C)C		IC50						=	134	nM	0.134	6.8729		A
M256	N1(C=C(c2c(cc(c(c2)OC)CN(C)C)OC)C(=C(C1=O)C)C)C		IC50						=	507	nM	0.507	6.29499		A
M270	n1cc2c(cc1)C(=CN(C2=O)C)c1cc(c(cc1OC)CN(C)C)OC		IC50						=	75	nM	0.075	7.12494		A
M252	N(Cc1cc(c(cc1OC)C1=CN(C(=O)c2c1cccc2)C)OC)(C)C		IC50						=	134	nM	0.134	6.8729		A
M268	O=C(c1ccc(cc1)C1=CN(C(=O)C(=C1)C)C)N		IC50						=	3681	nM	3.681	5.43403		A
M254	N1(C(=O)C(=CC(=C1)c1ccc(cc1)CN(C)C)C)C		IC50						=	31421	nM	31.421	4.50278		N
M249	N(Cc1c(cc(cc1)C1=CN(C(=O)C(=C1)C)C)OC)(C)C		IC50						=	81300	nM	81.3	4.08991		N
M260	N1(C=C(c2cc(c(c(c2)OC)CN(C)C)OC)C=C(C1=O)C)C		IC50						=	5861	nM	5.861	5.23203		A
M261	N1(C=C(c2cc(c(c(c2)OC)CN(C)C)C)C=C(C1=O)C)C		IC50						=	32430	nM	32.43	4.48905		N
M250	N(Cc1c(cc(c(c1)OC)C1=CN(C(=O)C(=C1)C)C)OC)(C)C		IC50						=	3778	nM	3.778	5.42274		A
M265	N1(C=C(c2cc(c(c(c2)OC)CN2CC(C2)O)OC)C=C(C1=O)C)C		IC50						=	1121	nM	1.121	5.95039		A
M266	N1(Cc2c(cc(cc2OC)C2=CN(C(=O)C(=C2)C)C)OC)CC(C1)N		IC50						=	1147	nM	1.147	5.94044		A
M253	N1(C(=C(c2cc(c(c(c2)OC)CN(C)C)OC)C=C(C1=O)C)C)C		IC50						=	30652	nM	30.652	4.51354		N
M263	N1(C=C(c2cc(c(c(c2)OC)CN(C)C)OC)C(=C(C1=O)C)C)C		IC50						=	23005	nM	23.005	4.63818		N
M255	N1(C(=O)c2c(cccc2)C(=C1)c1cc(c(c(c1)OC)CN(C)C)OC)C		IC50						=	23576	nM	23.576	4.62753		N
M259	N1(C=C(c2c(nccc2)C1=O)c1cc(c(c(c1)OC)CN(C)C)OC)C		IC50						=	47359	nM	47.359	4.3246		N
M267	n1cc2c(cc1)C(=CN(C2=O)C)c1cc(c(c(c1)OC)CN(C)C)OC		IC50						>	100000	nM	100	4		N
M258	N1(C=C(c2c(ccnc2)C1=O)c1cc(c(c(c1)OC)CN(C)C)OC)C		IC50						>	100000	nM	100	4		N
M257	N1(C=C(c2c(cccn2)C1=O)c1cc(c(c(c1)OC)CN(C)C)OC)C		IC50						>	100000	nM	100	4		N
M251	N(Cc1c(cc(c(c1)OC)C1=C(N(C(=O)C(=C1)C)C)C)OC)(C)C		IC50						=	61917	nM	61.917	4.20819		N
M256	N1(C=C(c2c(cc(c(c2)OC)CN(C)C)OC)C(=C(C1=O)C)C)C		IC50						=	43998	nM	43.998	4.35657		N
M269	n1cc2c(cc1)C(=CN(C2=O)C)c1cc(c(cc1OC)CN(C)C)OC		IC50						>	100000	nM	100	4		N
M252	N(Cc1cc(c(cc1OC)C1=CN(C(=O)c2c1cccc2)C)OC)(C)C		IC50						=	47095	nM	47.095	4.32703		N
M262	N1(C=C(c2cc(c(c(c2)OC)CN(C)C)OC)C=C(C1=O)C)C		IC50						=	14256	nM	14.256	4.846		N
M253	N1(C(=C(c2cc(c(c(c2)OC)CN(C)C)OC)C=C(C1=O)C)C)C		IC50						>	100000	nM	100	4		N
M263	N1(C=C(c2cc(c(c(c2)OC)CN(C)C)OC)C(=C(C1=O)C)C)C		IC50						=	42281	nM	42.281	4.37385		N
M255	N1(C(=O)c2c(cccc2)C(=C1)c1cc(c(c(c1)OC)CN(C)C)OC)C		IC50						=	32432	nM	32.432	4.48903		N
M259	N1(C=C(c2c(nccc2)C1=O)c1cc(c(c(c1)OC)CN(C)C)OC)C		IC50						>	100000	nM	100	4		N
M267	n1cc2c(cc1)C(=CN(C2=O)C)c1cc(c(c(c1)OC)CN(C)C)OC		IC50						>	100000	nM	100	4		N
M258	N1(C=C(c2c(ccnc2)C1=O)c1cc(c(c(c1)OC)CN(C)C)OC)C		IC50						>	100000	nM	100	4		N
M257	N1(C=C(c2c(cccn2)C1=O)c1cc(c(c(c1)OC)CN(C)C)OC)C		IC50						>	100000	nM	100	4		N
M269	n1cncc2c1C(=CN(C2=O)C)c1cc(c(c(c1)OC)CN(C)C)OC		IC50						>	100000	nM	100	4		N
M251	N(Cc1c(cc(c(c1)OC)C1=C(N(C(=O)C(=C1)C)C)C)OC)(C)C		IC50						>	100000	nM	100	4		N
M256	N1(C=C(c2c(cc(c(c2)OC)CN(C)C)OC)C(=C(C1=O)C)C)C		IC50						=	67479	nM	67.479	4.17083		N
M252	N(Cc1cc(c(cc1OC)C1=CN(C(=O)c2c1cccc2)C)OC)(C)C		IC50						=	86973	nM	86.973	4.06062		N
M262	N1(C=C(c2cc(c(c(c2)OC)CN(C)C)OC)C=C(C1=O)C)C		IC50						=	5876	nM	5.876	5.23092		A
M253	N1(C(=C(c2cc(c(c(c2)OC)CN(C)C)OC)C=C(C1=O)C)C)C		IC50						=	33234	nM	33.234	4.47842		N
M263	N1(C=C(c2cc(c(c(c2)OC)CN(C)C)OC)C(=C(C1=O)C)C)C		IC50						=	16654	nM	16.654	4.77848		N
M255	N1(C(=O)c2c(cccc2)C(=C1)c1cc(c(c(c1)OC)CN(C)C)OC)C		IC50						=	50857	nM	50.857	4.29365		N
M259	N1(C=C(c2c(nccc2)C1=O)c1cc(c(c(c1)OC)CN(C)C)OC)C		IC50						>	100000	nM	100	4		N
M267	n1cc2c(cc1)C(=CN(C2=O)C)c1cc(c(c(c1)OC)CN(C)C)OC		IC50						>	100000	nM	100	4		N
M258	N1(C=C(c2c(ccnc2)C1=O)c1cc(c(c(c1)OC)CN(C)C)OC)C		IC50						>	100000	nM	100	4		N
M257	N1(C=C(c2c(cccn2)C1=O)c1cc(c(c(c1)OC)CN(C)C)OC)C		IC50						>	100000	nM	100	4		N
M269	n1cncc2c1C(=CN(C2=O)C)c1cc(c(c(c1)OC)CN(C)C)OC		IC50						>	100000	nM	100	4		N
M251	N(Cc1c(cc(c(c1)OC)C1=C(N(C(=O)C(=C1)C)C)C)OC)(C)C		IC50						=	59555	nM	59.555	4.22508		N
M256	N1(C=C(c2c(cc(c(c2)OC)CN(C)C)OC)C(=C(C1=O)C)C)C		IC50						=	30330	nM	30.33	4.51813		N
M252	N(Cc1cc(c(cc1OC)C1=CN(C(=O)c2c1cccc2)C)OC)(C)C		IC50						=	21687	nM	21.687	4.6638		N
M262	N1(C=C(c2cc(c(c(c2)OC)CN(C)C)OC)C=C(C1=O)C)C		IC50						=	230	nM	0.23	6.63827		A
M253	N1(C(=C(c2cc(c(c(c2)OC)CN(C)C)OC)C=C(C1=O)C)C)C		IC50						=	240	nM	0.24	6.61979		A
M263	N1(C=C(c2cc(c(c(c2)OC)CN(C)C)OC)C(=C(C1=O)C)C)C		IC50						=	41	nM	0.041	7.38722		A
M255	N1(C(=O)c2c(cccc2)C(=C1)c1cc(c(c(c1)OC)CN(C)C)OC)C		IC50						=	108	nM	0.108	6.96658		A
M259	N1(C=C(c2c(nccc2)C1=O)c1cc(c(c(c1)OC)CN(C)C)OC)C		IC50						=	3725	nM	3.725	5.42887		A
M267	n1cc2c(cc1)C(=CN(C2=O)C)c1cc(c(c(c1)OC)CN(C)C)OC		IC50						=	117	nM	0.117	6.93181		A
M258	N1(C=C(c2c(ccnc2)C1=O)c1cc(c(c(c1)OC)CN(C)C)OC)C		IC50						=	1565	nM	1.565	5.80549		A
M257	N1(C=C(c2c(cccn2)C1=O)c1cc(c(c(c1)OC)CN(C)C)OC)C		IC50						=	2475	nM	2.475	5.60642		A
M251	N(Cc1c(cc(c(c1)OC)C1=C(N(C(=O)C(=C1)C)C)C)OC)(C)C		IC50						=	3283	nM	3.283	5.48373		A
M256	N1(C=C(c2c(cc(c(c2)OC)CN(C)C)OC)C(=C(C1=O)C)C)C		IC50						=	2976	nM	2.976	5.52637		A
M269	n1cc2c(cc1)C(=CN(C2=O)C)c1cc(c(cc1OC)CN(C)C)OC		IC50						=	3410	nM	3.41	5.46725		A
M252	N(Cc1cc(c(cc1OC)C1=CN(C(=O)c2c1cccc2)C)OC)(C)C		IC50						=	4307	nM	4.307	5.36583		A
M267	n1cc2c(cc1)C(=CN(C2=O)C)c1cc(c(c(c1)OC)CN(C)C)OC		IC50						=	187	nM	0.187	6.72816		A
M269	n1cc2c(cc1)C(=CN(C2=O)C)c1cc(c(cc1OC)CN(C)C)OC		IC50						=	200	nM	0.2	6.69897		A
M231	CN(C)/C=C/C(=O)c1ccccc1O		DeltaTm							4.9	degC			10 uM	A
M108	c1ccc(c(c1)C(=O)/C=C/N2CCc3cn[nH]c3C2)O		DeltaTm							7.8	degC			10 uM	A
M106	c1ccc(c(c1)C(=O)/C=C/N2CCC(CC2)c3cc[nH]n3)O		DeltaTm							6.9	degC			10 uM	A
M110	c1ccc(c(c1)C(=O)/C=C/N2CCN(CC2)c3cccc(n3)OCc4ccncc4)O		DeltaTm							7	degC			10 uM	A
M105	c1ccc(c(c1)C(=O)/C=C/N2CC3CCC(C2)CC3)O		DeltaTm							6.6	degC			10 uM	A
M111	c1ccc(c(c1)C(=O)/C=C/N2CCN(CC2)c3ncccn3)O		DeltaTm							4.6	degC			10 uM	A
M102	c1cc(c(cc1)O)C(=O)/C=C/N2Cc3c(c(ncc3)N[C@H]4CC[C@@H](CC4)O)CC2		DeltaTm							8.3	degC			10 uM	A
M109	c1ccc(c(c1)C(=O)/C=C/N2CCCC2)O		DeltaTm							5.7	degC			10 uM	A
M247	COc1cccc(c1O)C(=O)/C=C/N2CCCC2		DeltaTm							0.4	degC			10 uM	N
M107	c1ccc(c(c1)C(=O)/C=C/N2CCc3c(ncnc3NC4CC4)C2)O		DeltaTm							9.1	degC			10 uM	A
M112	c1ccc(cc1)Cn2cnc3c2CCN(C3)/C=C/C(=O)c4ccccc4O		DeltaTm							8	degC			10 uM	A
M232	CN(C)c1c2c(ncn1)CN(CC2)/C=C/C(=O)c3ccccc3O		DeltaTm							5.1	degC			10 uM	A
M146	CC(C)(C)c1nc2c(n1CC3CC3)CCN(C2)/C=C/C(=O)c4ccccc4O		DeltaTm							8	degC			10 uM	A
M147	CC(C)(C)OC(=O)N1CCN(C2(C1)CC2)/C=C/C(=O)c3ccccc3O		DeltaTm							7.6	degC			10 uM	A
M104	c1ccc(c(c1)C(=O)/C=C/N2C[C@H]3C[C@@H]2CN3c4ccccn4)O		DeltaTm							9.1	degC			10 uM	A
M103	c1ccc(c(c1)C(=O)/C=C/N2[C@H]3CC[C@@H]2c4c(c(ncn4)NC5CC5)C3)O		DeltaTm							9.3	degC			10 uM	A
M248	COc1cccc(c1O)C(=O)/C=C/N2C[C@H]3C[C@@H]2CN3c4nccc(n4)NCC#C		DeltaTm							-0.4	degC			10 uM	N
M231	CN(C)/C=C/C(=O)c1ccccc1O		DeltaTm							3.3	degC			10 uM	A
M108	c1ccc(c(c1)C(=O)/C=C/N2CCc3cn[nH]c3C2)O		DeltaTm							7	degC			10 uM	A
M106	c1ccc(c(c1)C(=O)/C=C/N2CCC(CC2)c3cc[nH]n3)O		DeltaTm							6.3	degC			10 uM	A
M110	c1ccc(c(c1)C(=O)/C=C/N2CCN(CC2)c3cccc(n3)OCc4ccncc4)O		DeltaTm							7.5	degC			10 uM	A
M105	c1ccc(c(c1)C(=O)/C=C/N2CC3CCC(C2)CC3)O		DeltaTm							3.8	degC			10 uM	A
M111	c1ccc(c(c1)C(=O)/C=C/N2CCN(CC2)c3ncccn3)O		DeltaTm							2.9	degC			10 uM	A
M102	c1cc(c(cc1)O)C(=O)/C=C/N2Cc3c(c(ncc3)N[C@H]4CC[C@@H](CC4)O)CC2		DeltaTm							6.1	degC			10 uM	A
M109	c1ccc(c(c1)C(=O)/C=C/N2CCCC2)O		DeltaTm							4.7	degC			10 uM	A
M247	COc1cccc(c1O)C(=O)/C=C/N2CCCC2		DeltaTm							0.7	degC			10 uM	N
M107	c1ccc(c(c1)C(=O)/C=C/N2CCc3c(ncnc3NC4CC4)C2)O		DeltaTm							7.7	degC			10 uM	A
M112	c1ccc(cc1)Cn2cnc3c2CCN(C3)/C=C/C(=O)c4ccccc4O		DeltaTm							5.3	degC			10 uM	A
M232	CN(C)c1c2c(ncn1)CN(CC2)/C=C/C(=O)c3ccccc3O		DeltaTm							3.4	degC			10 uM	A
M146	CC(C)(C)c1nc2c(n1CC3CC3)CCN(C2)/C=C/C(=O)c4ccccc4O		DeltaTm							5.8	degC			10 uM	A
M147	CC(C)(C)OC(=O)N1CCN(C2(C1)CC2)/C=C/C(=O)c3ccccc3O		DeltaTm							6.1	degC			10 uM	A
M104	c1ccc(c(c1)C(=O)/C=C/N2C[C@H]3C[C@@H]2CN3c4ccccn4)O		DeltaTm							7	degC			10 uM	A
M103	c1ccc(c(c1)C(=O)/C=C/N2[C@H]3CC[C@@H]2c4c(c(ncn4)NC5CC5)C3)O		DeltaTm							7.4	degC			10 uM	A
M248	COc1cccc(c1O)C(=O)/C=C/N2C[C@H]3C[C@@H]2CN3c4nccc(n4)NCC#C		DeltaTm							0.7	degC			10 uM	N
M103	c1ccc(c(c1)C(=O)/C=C/N2[C@H]3CC[C@@H]2c4c(c(ncn4)NC5CC5)C3)O		DeltaTm							-0.49	degC			10 uM	N
M103	c1ccc(c(c1)C(=O)/C=C/N2[C@H]3CC[C@@H]2c4c(c(ncn4)NC5CC5)C3)O		DeltaTm							-0.23	degC			10 uM	N
M103	c1ccc(c(c1)C(=O)/C=C/N2[C@H]3CC[C@@H]2c4c(c(ncn4)NC5CC5)C3)O		DeltaTm							0.21	degC			10 uM	N
M103	c1ccc(c(c1)C(=O)/C=C/N2[C@H]3CC[C@@H]2c4c(c(ncn4)NC5CC5)C3)O		DeltaTm							0.17	degC			10 uM	N
M103	c1ccc(c(c1)C(=O)/C=C/N2[C@H]3CC[C@@H]2c4c(c(ncn4)NC5CC5)C3)O		DeltaTm							0.62	degC			10 uM	N
M103	c1ccc(c(c1)C(=O)/C=C/N2[C@H]3CC[C@@H]2c4c(c(ncn4)NC5CC5)C3)O		DeltaTm							0.11	degC			10 uM	N
M103	c1ccc(c(c1)C(=O)/C=C/N2[C@H]3CC[C@@H]2c4c(c(ncn4)NC5CC5)C3)O		DeltaTm							0.49	degC			10 uM	N
M103	c1ccc(c(c1)C(=O)/C=C/N2[C@H]3CC[C@@H]2c4c(c(ncn4)NC5CC5)C3)O		DeltaTm							0.24	degC			10 uM	N
M103	c1ccc(c(c1)C(=O)/C=C/N2[C@H]3CC[C@@H]2c4c(c(ncn4)NC5CC5)C3)O		DeltaTm							0.8	degC			10 uM	N
M103	c1ccc(c(c1)C(=O)/C=C/N2[C@H]3CC[C@@H]2c4c(c(ncn4)NC5CC5)C3)O		DeltaTm							0.28	degC			10 uM	N
M103	c1ccc(c(c1)C(=O)/C=C/N2[C@H]3CC[C@@H]2c4c(c(ncn4)NC5CC5)C3)O		DeltaTm							0.26	degC			10 uM	N
M103	c1ccc(c(c1)C(=O)/C=C/N2[C@H]3CC[C@@H]2c4c(c(ncn4)NC5CC5)C3)O		DeltaTm							-0.28	degC			10 uM	N
M103	c1ccc(c(c1)C(=O)/C=C/N2[C@H]3CC[C@@H]2c4c(c(ncn4)NC5CC5)C3)O		DeltaTm							0.37	degC			10 uM	N
M103	c1ccc(c(c1)C(=O)/C=C/N2[C@H]3CC[C@@H]2c4c(c(ncn4)NC5CC5)C3)O		DeltaTm							0.12	degC			10 uM	N
M103	c1ccc(c(c1)C(=O)/C=C/N2[C@H]3CC[C@@H]2c4c(c(ncn4)NC5CC5)C3)O		DeltaTm							0.13	degC			10 uM	N
M103	c1ccc(c(c1)C(=O)/C=C/N2[C@H]3CC[C@@H]2c4c(c(ncn4)NC5CC5)C3)O		DeltaTm							0.49	degC			10 uM	N
M103	c1ccc(c(c1)C(=O)/C=C/N2[C@H]3CC[C@@H]2c4c(c(ncn4)NC5CC5)C3)O		DeltaTm							0.02	degC			10 uM	N
M103	c1ccc(c(c1)C(=O)/C=C/N2[C@H]3CC[C@@H]2c4c(c(ncn4)NC5CC5)C3)O		DeltaTm							0.25	degC			10 uM	N
M103	c1ccc(c(c1)C(=O)/C=C/N2[C@H]3CC[C@@H]2c4c(c(ncn4)NC5CC5)C3)O		DeltaTm							0.32	degC			10 uM	N
M103	c1ccc(c(c1)C(=O)/C=C/N2[C@H]3CC[C@@H]2c4c(c(ncn4)NC5CC5)C3)O		DeltaTm							0.31	degC			10 uM	N
M103	c1ccc(c(c1)C(=O)/C=C/N2[C@H]3CC[C@@H]2c4c(c(ncn4)NC5CC5)C3)O		DeltaTm							-0.01	degC			10 uM	N
M103	c1ccc(c(c1)C(=O)/C=C/N2[C@H]3CC[C@@H]2c4c(c(ncn4)NC5CC5)C3)O		DeltaTm							0.3	degC			10 uM	N
M103	c1ccc(c(c1)C(=O)/C=C/N2[C@H]3CC[C@@H]2c4c(c(ncn4)NC5CC5)C3)O		DeltaTm							0.22	degC			10 uM	N
M103	c1ccc(c(c1)C(=O)/C=C/N2[C@H]3CC[C@@H]2c4c(c(ncn4)NC5CC5)C3)O		DeltaTm							0.37	degC			10 uM	N
M103	c1ccc(c(c1)C(=O)/C=C/N2[C@H]3CC[C@@H]2c4c(c(ncn4)NC5CC5)C3)O		DeltaTm							-0.05	degC			10 uM	N
M103	c1ccc(c(c1)C(=O)/C=C/N2[C@H]3CC[C@@H]2c4c(c(ncn4)NC5CC5)C3)O		DeltaTm							0.22	degC			10 uM	N
M235	CN1C=CC(C=CN2)=C2C1=O		IC50							18.4	uM	18.4	4.73518		N
M236	CN1C=C(C2=CC(C(N(C)C)=O)=CC=C2)C(C=CN3)=C3C1=O		IC50							0.092	uM	0.092	7.03621		A
M274	O=C1C2=C(C=CN2)C(C3=CC(C(N(C)C)=O)=CC=C3)=CN1CC=C		IC50							6.3	uM	6.3	5.20066		A
M271	O=C1C2=C(C=CN2)C(C3=CC(C(N(C)C)=O)=CC=C3)=CN1C/C=C/C		IC50							0.46	uM	0.46	6.33724		A
M276	O=C1C2=C(C=CN2)C(C3=CC(C(N(C)C)=O)=CC=C3)=CN1CCC=C		IC50							2.5	uM	2.5	5.60206		A
M273	O=C1C2=C(C=CN2)C(C3=CC(C(N(C)C)=O)=CC=C3)=CN1CC		IC50							0.5	uM	0.5	6.30103		A
M275	O=C1C2=C(C=CN2)C(C3=CC(C(N(C)C)=O)=CC=C3)=CN1CCC		IC50							7.1	uM	7.1	5.14874		A
M277	O=C1C2=C(C=CN2)C(C3=CC(C(N(C)C)=O)=CC=C3)=CN1CCCC		IC50							2.4	uM	2.4	5.61979		A
M278	O=C1C2=C(C=CN2)C(C3=CC(C(N(C)C)=O)=CC=C3)=CN1CCOC		IC50							5.1	uM	5.1	5.29243		A
M235	CN1C=CC(C=CN2)=C2C1=O		IC50							7.5	uM	7.5	5.12494		A
M236	CN1C=C(C2=CC(C(N(C)C)=O)=CC=C2)C(C=CN3)=C3C1=O		IC50							0.065	uM	0.065	7.18709		A
M274	O=C1C2=C(C=CN2)C(C3=CC(C(N(C)C)=O)=CC=C3)=CN1CC=C		IC50							1.5	uM	1.5	5.82391		A
M271	O=C1C2=C(C=CN2)C(C3=CC(C(N(C)C)=O)=CC=C3)=CN1C/C=C/C		IC50							1.4	uM	1.4	5.85387		A
M276	O=C1C2=C(C=CN2)C(C3=CC(C(N(C)C)=O)=CC=C3)=CN1CCC=C		IC50							5.5	uM	5.5	5.25964		A
M273	O=C1C2=C(C=CN2)C(C3=CC(C(N(C)C)=O)=CC=C3)=CN1CC		IC50							0.56	uM	0.56	6.25181		A
M275	O=C1C2=C(C=CN2)C(C3=CC(C(N(C)C)=O)=CC=C3)=CN1CCC		IC50							2.7	uM	2.7	5.56864		A
M277	O=C1C2=C(C=CN2)C(C3=CC(C(N(C)C)=O)=CC=C3)=CN1CCCC		IC50							7	uM	7	5.1549		A
M278	O=C1C2=C(C=CN2)C(C3=CC(C(N(C)C)=O)=CC=C3)=CN1CCOC		IC50							1.9	uM	1.9	5.72125		A
M235	CN1C=CC(C=CN2)=C2C1=O		IC50							11.8	uM	11.8	4.92812		N
M236	CN1C=C(C2=CC(C(N(C)C)=O)=CC=C2)C(C=CN3)=C3C1=O		IC50							0.56	uM	0.56	6.25181		A
M274	O=C1C2=C(C=CN2)C(C3=CC(C(N(C)C)=O)=CC=C3)=CN1CC=C		IC50							9.7	uM	9.7	5.01323		A
M271	O=C1C2=C(C=CN2)C(C3=CC(C(N(C)C)=O)=CC=C3)=CN1C/C=C/C		IC50						>	20	uM	20	4.69897		N
M276	O=C1C2=C(C=CN2)C(C3=CC(C(N(C)C)=O)=CC=C3)=CN1CCC=C		IC50						>	20	uM	20	4.69897		N
M273	O=C1C2=C(C=CN2)C(C3=CC(C(N(C)C)=O)=CC=C3)=CN1CC		IC50							0.85	uM	0.85	6.07058		A
M275	O=C1C2=C(C=CN2)C(C3=CC(C(N(C)C)=O)=CC=C3)=CN1CCC		IC50						>	20	uM	20	4.69897		N
M277	O=C1C2=C(C=CN2)C(C3=CC(C(N(C)C)=O)=CC=C3)=CN1CCCC		IC50						>	20	uM	20	4.69897		N
M235	CN1C=CC(C=CN2)=C2C1=O		IC50							53.8	uM	53.8	4.26922		N
M236	CN1C=C(C2=CC(C(N(C)C)=O)=CC=C2)C(C=CN3)=C3C1=O		IC50							1.5	uM	1.5	5.82391		A
M274	O=C1C2=C(C=CN2)C(C3=CC(C(N(C)C)=O)=CC=C3)=CN1CC=C		IC50						>	20	uM	20	4.69897		N
M271	O=C1C2=C(C=CN2)C(C3=CC(C(N(C)C)=O)=CC=C3)=CN1C/C=C/C		IC50						>	20	uM	20	4.69897		N
M276	O=C1C2=C(C=CN2)C(C3=CC(C(N(C)C)=O)=CC=C3)=CN1CCC=C		IC50						>	20	uM	20	4.69897		N
M273	O=C1C2=C(C=CN2)C(C3=CC(C(N(C)C)=O)=CC=C3)=CN1CC		IC50							14.5	uM	14.5	4.83863		N
M275	O=C1C2=C(C=CN2)C(C3=CC(C(N(C)C)=O)=CC=C3)=CN1CCC		IC50						>	20	uM	20	4.69897		N
M277	O=C1C2=C(C=CN2)C(C3=CC(C(N(C)C)=O)=CC=C3)=CN1CCCC		IC50						>	20	uM	20	4.69897		N
M235	CN1C=CC(C=CN2)=C2C1=O		IC50							13.7	uM	13.7	4.86328		N
M236	CN1C=C(C2=CC(C(N(C)C)=O)=CC=C2)C(C=CN3)=C3C1=O		IC50							0.23	uM	0.23	6.63827		A
M274	O=C1C2=C(C=CN2)C(C3=CC(C(N(C)C)=O)=CC=C3)=CN1CC=C		IC50							0.29	uM	0.29	6.5376		A
M271	O=C1C2=C(C=CN2)C(C3=CC(C(N(C)C)=O)=CC=C3)=CN1C/C=C/C		IC50							0.16	uM	0.16	6.79588		A
M276	O=C1C2=C(C=CN2)C(C3=CC(C(N(C)C)=O)=CC=C3)=CN1CCC=C		IC50							1.4	uM	1.4	5.85387		A
M273	O=C1C2=C(C=CN2)C(C3=CC(C(N(C)C)=O)=CC=C3)=CN1CC		IC50							0.7	uM	0.7	6.1549		A
M275	O=C1C2=C(C=CN2)C(C3=CC(C(N(C)C)=O)=CC=C3)=CN1CCC		IC50							0.68	uM	0.68	6.16749		A
M277	O=C1C2=C(C=CN2)C(C3=CC(C(N(C)C)=O)=CC=C3)=CN1CCCC		IC50							0.74	uM	0.74	6.13077		A
M278	O=C1C2=C(C=CN2)C(C3=CC(C(N(C)C)=O)=CC=C3)=CN1CCOC		IC50							3.2	uM	3.2	5.49485		A
M235	CN1C=CC(C=CN2)=C2C1=O		IC50							23.7	uM	23.7	4.62525		N
M236	CN1C=C(C2=CC(C(N(C)C)=O)=CC=C2)C(C=CN3)=C3C1=O		IC50							0.059	uM	0.059	7.22915		A
M274	O=C1C2=C(C=CN2)C(C3=CC(C(N(C)C)=O)=CC=C3)=CN1CC=C		IC50							0.77	uM	0.77	6.11351		A
M271	O=C1C2=C(C=CN2)C(C3=CC(C(N(C)C)=O)=CC=C3)=CN1C/C=C/C		IC50							0.41	uM	0.41	6.38722		A
M276	O=C1C2=C(C=CN2)C(C3=CC(C(N(C)C)=O)=CC=C3)=CN1CCC=C		IC50							0.046	uM	0.046	7.33724		A
M273	O=C1C2=C(C=CN2)C(C3=CC(C(N(C)C)=O)=CC=C3)=CN1CC		IC50							0.55	uM	0.55	6.25964		A
M275	O=C1C2=C(C=CN2)C(C3=CC(C(N(C)C)=O)=CC=C3)=CN1CCC		IC50							1.1	uM	1.1	5.95861		A
M277	O=C1C2=C(C=CN2)C(C3=CC(C(N(C)C)=O)=CC=C3)=CN1CCCC		IC50							0.85	uM	0.85	6.07058		A
M278	O=C1C2=C(C=CN2)C(C3=CC(C(N(C)C)=O)=CC=C3)=CN1CCOC		IC50							2.3	uM	2.3	5.63827		A
M235	CN1C=CC(C=CN2)=C2C1=O		IC50							42.8	uM	42.8	4.36856		N
M236	CN1C=C(C2=CC(C(N(C)C)=O)=CC=C2)C(C=CN3)=C3C1=O		IC50							0.24	uM	0.24	6.61979		A
M274	O=C1C2=C(C=CN2)C(C3=CC(C(N(C)C)=O)=CC=C3)=CN1CC=C		IC50							0.17	uM	0.17	6.76955		A
M271	O=C1C2=C(C=CN2)C(C3=CC(C(N(C)C)=O)=CC=C3)=CN1C/C=C/C		IC50							5.7	uM	5.7	5.24413		A
M276	O=C1C2=C(C=CN2)C(C3=CC(C(N(C)C)=O)=CC=C3)=CN1CCC=C		IC50							4.8	uM	4.8	5.31876		A
M273	O=C1C2=C(C=CN2)C(C3=CC(C(N(C)C)=O)=CC=C3)=CN1CC		IC50							1.1	uM	1.1	5.95861		A
M275	O=C1C2=C(C=CN2)C(C3=CC(C(N(C)C)=O)=CC=C3)=CN1CCC		IC50							2.5	uM	2.5	5.60206		A
M277	O=C1C2=C(C=CN2)C(C3=CC(C(N(C)C)=O)=CC=C3)=CN1CCCC		IC50							12.2	uM	12.2	4.91364		N
M278	O=C1C2=C(C=CN2)C(C3=CC(C(N(C)C)=O)=CC=C3)=CN1CCOC		IC50							13.6	uM	13.6	4.86646		N
M239	Cn1c2cc(c(cc2n(c1=O)C)N3CCCCC3)NC(=O)c4ccccc4OC		pIC50										7.1		A
M245	CNc1cc2c(cc1NC(=O)c3ccccc3OC)n(c(=O)n2C)C		pIC50										7.3		A
M153	CC(C)Oc1cc2c(cc1NC(=O)c3ccccc3OC)n(c(=O)n2C)C		pIC50										7.5		A
M158	CC(C)Oc1cc2c(cc1NC(=O)c3ccccc3OCCCO)n(c(=O)n2C)C		pIC50										6.9		A
M157	CC(C)Oc1cc2c(cc1NC(=O)c3ccccc3OCC(=O)N)n(c(=O)n2C)C		pIC50										7		A
M159	CC(C)Oc1cc2c(cc1NC(=O)c3ccccc3OCCN(C)C)n(c(=O)n2C)C		pIC50										6.5		A
M152	CC(C)Oc1cc2c(cc1NC(=O)c3ccccc3OC#N)n(c(=O)n2C)C		pIC50										6.8		A
M160	CC(C)Oc1cc2c(cc1NC(=O)c3ccccc3OCCOC)n(c(=O)n2C)C		pIC50										7		A
M156	CC(C)Oc1cc2c(cc1NC(=O)c3ccccc3OCC(=O)N(C)C)n(c(=O)n2C)C		pIC50										7		A
M155	CC(C)Oc1cc2c(cc1NC(=O)c3ccccc3OC4CCN(C4)C)n(c(=O)n2C)C		pIC50										6.5		A
M149	CC(C)Oc1cc2c(cc1NC(=O)C)n(c(=O)n2C)C		pIC50										6		A
M219	CCC(=O)Nc1cc2c(cc1OC(C)C)n(c(=O)n2C)C		pIC50										5.9		A
M163	CC(C)Oc1cc2c(cc1NC(=O)C3CCNC3)n(c(=O)n2C)C		pIC50										6.1		A
M165	CC(C)Oc1cc2c(cc1NC(=O)C3CCOCC3)n(c(=O)n2C)C		pIC50										5.8		A
M161	CC(C)Oc1cc2c(cc1NC(=O)c3ccccn3)n(c(=O)n2C)C		pIC50										7.2		A
M164	CC(C)Oc1cc2c(cc1NC(=O)c3ccncn3)n(c(=O)n2C)C		pIC50										6.9		A
M162	CC(C)Oc1cc2c(cc1NC(=O)c3cccnc3OC)n(c(=O)n2C)C		pIC50										7.5		A
M151	CC(C)Oc1cc2c(cc1NC(=O)c3c(cccn3)OC)n(c(=O)n2C)C		pIC50										7		A
M150	CC(C)Oc1cc2c(cc1NC(=O)c3c(cccc3OC)OC)n(c(=O)n2C)C		pIC50										5.7		A
M154	CC(C)Oc1cc2c(cc1NC(=O)c3ccccc3OC)n(c(=O)n2C)CCO		pIC50										5.9		A
M240	Cn1c2cc(c(cc2n(c1=O)C)N3CCCC3)NC(=O)c4ccccc4OC		pIC50										7.3		A
M241	Cn1c2cc(c(cc2n(c1=O)C)N3CCNCC3)NC(=O)c4ccccc4OC		pIC50										7.1		A
M242	Cn1c2cc(c(cc2n(c1=O)C)N3CCN(CC3)C)NC(=O)c4ccccc4OC		pIC50										6.7		A
M243	Cn1c2cc(c(cc2n(c1=O)C)NC(=O)c3ccccc3OC)C4CCNCC4		pIC50										5.5		A
M244	Cn1c2cc(c(cc2n(c1=O)C)NC(=O)c3ccccc3OC)C4=CCNCC4		pIC50										5.9		A
M227	CCN(c1cc2c(cc1N3CCNC[C@H]3C)n(c(=O)n2C)C)C(=O)c4ccccc4OC		pIC50										6		A
M239	Cn1c2cc(c(cc2n(c1=O)C)N3CCCCC3)NC(=O)c4ccccc4OC		pIC50										5.2		A
M245	CNc1cc2c(cc1NC(=O)c3ccccc3OC)n(c(=O)n2C)C		pIC50										5.4		A
46249116	Cc1cc2c(cc1NC(=O)c3ccccc3OC)n(c(=O)n2C)C		pIC50										4.8		N
46249215	Cn1c2cc(c(cc2n(c1=O)C)OC)NC(=O)c3ccccc3OC		pIC50										5.2		A
M153	CC(C)Oc1cc2c(cc1NC(=O)c3ccccc3OC)n(c(=O)n2C)C		pIC50										5.6		A
M158	CC(C)Oc1cc2c(cc1NC(=O)c3ccccc3OCCCO)n(c(=O)n2C)C		pIC50										5.5		A
M157	CC(C)Oc1cc2c(cc1NC(=O)c3ccccc3OCC(=O)N)n(c(=O)n2C)C		pIC50										5.6		A
M159	CC(C)Oc1cc2c(cc1NC(=O)c3ccccc3OCCN(C)C)n(c(=O)n2C)C		pIC50										5.4		A
M152	CC(C)Oc1cc2c(cc1NC(=O)c3ccccc3OC#N)n(c(=O)n2C)C		pIC50										5.2		A
M160	CC(C)Oc1cc2c(cc1NC(=O)c3ccccc3OCCOC)n(c(=O)n2C)C		pIC50										5.6		A
M156	CC(C)Oc1cc2c(cc1NC(=O)c3ccccc3OCC(=O)N(C)C)n(c(=O)n2C)C		pIC50										5.4		A
M155	CC(C)Oc1cc2c(cc1NC(=O)c3ccccc3OC4CCN(C4)C)n(c(=O)n2C)C		pIC50										5.3		A
M149	CC(C)Oc1cc2c(cc1NC(=O)C)n(c(=O)n2C)C		pIC50										4.9		N
M219	CCC(=O)Nc1cc2c(cc1OC(C)C)n(c(=O)n2C)C		pIC50										4.9		N
M163	CC(C)Oc1cc2c(cc1NC(=O)C3CCNC3)n(c(=O)n2C)C		pIC50										4.8		N
M165	CC(C)Oc1cc2c(cc1NC(=O)C3CCOCC3)n(c(=O)n2C)C		pIC50										4.8		N
M161	CC(C)Oc1cc2c(cc1NC(=O)c3ccccn3)n(c(=O)n2C)C		pIC50										5.4		A
M164	CC(C)Oc1cc2c(cc1NC(=O)c3ccncn3)n(c(=O)n2C)C		pIC50										5.4		A
M162	CC(C)Oc1cc2c(cc1NC(=O)c3cccnc3OC)n(c(=O)n2C)C		pIC50										5.5		A
M151	CC(C)Oc1cc2c(cc1NC(=O)c3c(cccn3)OC)n(c(=O)n2C)C		pIC50										5.2		A
M150	CC(C)Oc1cc2c(cc1NC(=O)c3c(cccc3OC)OC)n(c(=O)n2C)C		pIC50										5		A
M154	CC(C)Oc1cc2c(cc1NC(=O)c3ccccc3OC)n(c(=O)n2C)CCO		pIC50										4.2		N
M240	Cn1c2cc(c(cc2n(c1=O)C)N3CCCC3)NC(=O)c4ccccc4OC		pIC50										5.5		A
M241	Cn1c2cc(c(cc2n(c1=O)C)N3CCNCC3)NC(=O)c4ccccc4OC		pIC50										5		A
M242	Cn1c2cc(c(cc2n(c1=O)C)N3CCN(CC3)C)NC(=O)c4ccccc4OC		pIC50										4.8		N
M243	Cn1c2cc(c(cc2n(c1=O)C)NC(=O)c3ccccc3OC)C4CCNCC4		pIC50										5.1		A
M244	Cn1c2cc(c(cc2n(c1=O)C)NC(=O)c3ccccc3OC)C4=CCNCC4		pIC50										5.4		A
M227	CCN(c1cc2c(cc1N3CCNC[C@H]3C)n(c(=O)n2C)C)C(=O)c4ccccc4OC		pIC50										4.3		N
M239	Cn1c2cc(c(cc2n(c1=O)C)N3CCCCC3)NC(=O)c4ccccc4OC		pIC50										4.5		N
M245	CNc1cc2c(cc1NC(=O)c3ccccc3OC)n(c(=O)n2C)C		pIC50										4.5		N
46249116	Cc1cc2c(cc1NC(=O)c3ccccc3OC)n(c(=O)n2C)C		pIC50										4		N
46249215	Cn1c2cc(c(cc2n(c1=O)C)OC)NC(=O)c3ccccc3OC		pIC50										4		N
M153	CC(C)Oc1cc2c(cc1NC(=O)c3ccccc3OC)n(c(=O)n2C)C		pIC50										4.8		N
M158	CC(C)Oc1cc2c(cc1NC(=O)c3ccccc3OCCCO)n(c(=O)n2C)C		pIC50										5		A
M157	CC(C)Oc1cc2c(cc1NC(=O)c3ccccc3OCC(=O)N)n(c(=O)n2C)C		pIC50										4.8		N
M159	CC(C)Oc1cc2c(cc1NC(=O)c3ccccc3OCCN(C)C)n(c(=O)n2C)C		pIC50										4.9		N
M152	CC(C)Oc1cc2c(cc1NC(=O)c3ccccc3OC#N)n(c(=O)n2C)C		pIC50										4.5		N
M160	CC(C)Oc1cc2c(cc1NC(=O)c3ccccc3OCCOC)n(c(=O)n2C)C		pIC50										4.5		N
M156	CC(C)Oc1cc2c(cc1NC(=O)c3ccccc3OCC(=O)N(C)C)n(c(=O)n2C)C		pIC50										5.1		A
M155	CC(C)Oc1cc2c(cc1NC(=O)c3ccccc3OC4CCN(C4)C)n(c(=O)n2C)C		pIC50										4.8		N
M149	CC(C)Oc1cc2c(cc1NC(=O)C)n(c(=O)n2C)C		pIC50										4.8		N
M219	CCC(=O)Nc1cc2c(cc1OC(C)C)n(c(=O)n2C)C		pIC50										4.3		N
M163	CC(C)Oc1cc2c(cc1NC(=O)C3CCNC3)n(c(=O)n2C)C		pIC50										4.3		N
M165	CC(C)Oc1cc2c(cc1NC(=O)C3CCOCC3)n(c(=O)n2C)C		pIC50										4.5		N
M161	CC(C)Oc1cc2c(cc1NC(=O)c3ccccn3)n(c(=O)n2C)C		pIC50										4.3		N
M164	CC(C)Oc1cc2c(cc1NC(=O)c3ccncn3)n(c(=O)n2C)C		pIC50										4.6		N
M162	CC(C)Oc1cc2c(cc1NC(=O)c3cccnc3OC)n(c(=O)n2C)C		pIC50										4.6		N
M151	CC(C)Oc1cc2c(cc1NC(=O)c3c(cccn3)OC)n(c(=O)n2C)C		pIC50										4.8		N
M150	CC(C)Oc1cc2c(cc1NC(=O)c3c(cccc3OC)OC)n(c(=O)n2C)C		pIC50										4.5		N
M154	CC(C)Oc1cc2c(cc1NC(=O)c3ccccc3OC)n(c(=O)n2C)CCO		pIC50										4.3		N
M240	Cn1c2cc(c(cc2n(c1=O)C)N3CCCC3)NC(=O)c4ccccc4OC		pIC50										4		N
M241	Cn1c2cc(c(cc2n(c1=O)C)N3CCNCC3)NC(=O)c4ccccc4OC		pIC50										4.7		N
M242	Cn1c2cc(c(cc2n(c1=O)C)N3CCN(CC3)C)NC(=O)c4ccccc4OC		pIC50										4.7		N
M243	Cn1c2cc(c(cc2n(c1=O)C)NC(=O)c3ccccc3OC)C4CCNCC4		pIC50										4.9		N
M244	Cn1c2cc(c(cc2n(c1=O)C)NC(=O)c3ccccc3OC)C4=CCNCC4		pIC50										4.8		N
M227	CCN(c1cc2c(cc1N3CCNC[C@H]3C)n(c(=O)n2C)C)C(=O)c4ccccc4OC		pIC50										4.9		N
M239	Cn1c2cc(c(cc2n(c1=O)C)N3CCCCC3)NC(=O)c4ccccc4OC		pIC50										4.6		N
M245	CNc1cc2c(cc1NC(=O)c3ccccc3OC)n(c(=O)n2C)C		pIC50										4.5		N
46249116	Cc1cc2c(cc1NC(=O)c3ccccc3OC)n(c(=O)n2C)C		pIC50										4.3		N
46249215	Cn1c2cc(c(cc2n(c1=O)C)OC)NC(=O)c3ccccc3OC		pIC50										4.3		N
M153	CC(C)Oc1cc2c(cc1NC(=O)c3ccccc3OC)n(c(=O)n2C)C		pIC50										4.7		N
M158	CC(C)Oc1cc2c(cc1NC(=O)c3ccccc3OCCCO)n(c(=O)n2C)C		pIC50										4.5		N
M157	CC(C)Oc1cc2c(cc1NC(=O)c3ccccc3OCC(=O)N)n(c(=O)n2C)C		pIC50										4.3		N
M159	CC(C)Oc1cc2c(cc1NC(=O)c3ccccc3OCCN(C)C)n(c(=O)n2C)C		pIC50										4.3		N
M152	CC(C)Oc1cc2c(cc1NC(=O)c3ccccc3OC#N)n(c(=O)n2C)C		pIC50										4.3		N
M160	CC(C)Oc1cc2c(cc1NC(=O)c3ccccc3OCCOC)n(c(=O)n2C)C		pIC50										4.3		N
M156	CC(C)Oc1cc2c(cc1NC(=O)c3ccccc3OCC(=O)N(C)C)n(c(=O)n2C)C		pIC50										4.3		N
M155	CC(C)Oc1cc2c(cc1NC(=O)c3ccccc3OC4CCN(C4)C)n(c(=O)n2C)C		pIC50										4.3		N
M149	CC(C)Oc1cc2c(cc1NC(=O)C)n(c(=O)n2C)C		pIC50										4.3		N
M219	CCC(=O)Nc1cc2c(cc1OC(C)C)n(c(=O)n2C)C		pIC50										4.3		N
M163	CC(C)Oc1cc2c(cc1NC(=O)C3CCNC3)n(c(=O)n2C)C		pIC50										4.3		N
M165	CC(C)Oc1cc2c(cc1NC(=O)C3CCOCC3)n(c(=O)n2C)C		pIC50										4.3		N
M161	CC(C)Oc1cc2c(cc1NC(=O)c3ccccn3)n(c(=O)n2C)C		pIC50										4.3		N
M164	CC(C)Oc1cc2c(cc1NC(=O)c3ccncn3)n(c(=O)n2C)C		pIC50										4.5		N
M162	CC(C)Oc1cc2c(cc1NC(=O)c3cccnc3OC)n(c(=O)n2C)C		pIC50										4.6		N
M151	CC(C)Oc1cc2c(cc1NC(=O)c3c(cccn3)OC)n(c(=O)n2C)C		pIC50										4.5		N
M150	CC(C)Oc1cc2c(cc1NC(=O)c3c(cccc3OC)OC)n(c(=O)n2C)C		pIC50										4.3		N
M154	CC(C)Oc1cc2c(cc1NC(=O)c3ccccc3OC)n(c(=O)n2C)CCO		pIC50										4.3		N
M240	Cn1c2cc(c(cc2n(c1=O)C)N3CCCC3)NC(=O)c4ccccc4OC		pIC50										4.3		N
M241	Cn1c2cc(c(cc2n(c1=O)C)N3CCNCC3)NC(=O)c4ccccc4OC		pIC50										4.3		N
M242	Cn1c2cc(c(cc2n(c1=O)C)N3CCN(CC3)C)NC(=O)c4ccccc4OC		pIC50										4.3		N
M243	Cn1c2cc(c(cc2n(c1=O)C)NC(=O)c3ccccc3OC)C4CCNCC4		pIC50										4.3		N
M244	Cn1c2cc(c(cc2n(c1=O)C)NC(=O)c3ccccc3OC)C4=CCNCC4		pIC50										4.3		N
M227	CCN(c1cc2c(cc1N3CCNC[C@H]3C)n(c(=O)n2C)C)C(=O)c4ccccc4OC		pIC50										4.3		N
M239	Cn1c2cc(c(cc2n(c1=O)C)N3CCCCC3)NC(=O)c4ccccc4OC		pIC50										4.7		N
M245	CNc1cc2c(cc1NC(=O)c3ccccc3OC)n(c(=O)n2C)C		pIC50										5		A
M153	CC(C)Oc1cc2c(cc1NC(=O)c3ccccc3OC)n(c(=O)n2C)C		pIC50										5.2		A
M158	CC(C)Oc1cc2c(cc1NC(=O)c3ccccc3OCCCO)n(c(=O)n2C)C		pIC50										4.4		N
M157	CC(C)Oc1cc2c(cc1NC(=O)c3ccccc3OCC(=O)N)n(c(=O)n2C)C		pIC50										4.3		N
M159	CC(C)Oc1cc2c(cc1NC(=O)c3ccccc3OCCN(C)C)n(c(=O)n2C)C		pIC50										4.3		N
M152	CC(C)Oc1cc2c(cc1NC(=O)c3ccccc3OC#N)n(c(=O)n2C)C		pIC50										4.5		N
M160	CC(C)Oc1cc2c(cc1NC(=O)c3ccccc3OCCOC)n(c(=O)n2C)C		pIC50										4.4		N
M156	CC(C)Oc1cc2c(cc1NC(=O)c3ccccc3OCC(=O)N(C)C)n(c(=O)n2C)C		pIC50										4.4		N
M155	CC(C)Oc1cc2c(cc1NC(=O)c3ccccc3OC4CCN(C4)C)n(c(=O)n2C)C		pIC50										4.6		N
M149	CC(C)Oc1cc2c(cc1NC(=O)C)n(c(=O)n2C)C		pIC50										4.3		N
M219	CCC(=O)Nc1cc2c(cc1OC(C)C)n(c(=O)n2C)C		pIC50										4.3		N
M163	CC(C)Oc1cc2c(cc1NC(=O)C3CCNC3)n(c(=O)n2C)C		pIC50										4.3		N
M165	CC(C)Oc1cc2c(cc1NC(=O)C3CCOCC3)n(c(=O)n2C)C		pIC50										4.3		N
M161	CC(C)Oc1cc2c(cc1NC(=O)c3ccccn3)n(c(=O)n2C)C		pIC50										4.6		N
M164	CC(C)Oc1cc2c(cc1NC(=O)c3ccncn3)n(c(=O)n2C)C		pIC50										4.6		N
M162	CC(C)Oc1cc2c(cc1NC(=O)c3cccnc3OC)n(c(=O)n2C)C		pIC50										4.8		N
M151	CC(C)Oc1cc2c(cc1NC(=O)c3c(cccn3)OC)n(c(=O)n2C)C		pIC50										4.5		N
M150	CC(C)Oc1cc2c(cc1NC(=O)c3c(cccc3OC)OC)n(c(=O)n2C)C		pIC50										4.3		N
M154	CC(C)Oc1cc2c(cc1NC(=O)c3ccccc3OC)n(c(=O)n2C)CCO		pIC50										4		N
M240	Cn1c2cc(c(cc2n(c1=O)C)N3CCCC3)NC(=O)c4ccccc4OC		pIC50										4.7		N
M241	Cn1c2cc(c(cc2n(c1=O)C)N3CCNCC3)NC(=O)c4ccccc4OC		pIC50										4.7		N
M242	Cn1c2cc(c(cc2n(c1=O)C)N3CCN(CC3)C)NC(=O)c4ccccc4OC		pIC50										4.7		N
M243	Cn1c2cc(c(cc2n(c1=O)C)NC(=O)c3ccccc3OC)C4CCNCC4		pIC50										4.9		N
M244	Cn1c2cc(c(cc2n(c1=O)C)NC(=O)c3ccccc3OC)C4=CCNCC4		pIC50										4.8		N
M227	CCN(c1cc2c(cc1N3CCNC[C@H]3C)n(c(=O)n2C)C)C(=O)c4ccccc4OC		pIC50										4.9		N
M233	CN(Cc1cn(nc1c2ccc(cc2)Cl)c3ccccc3)Cc4nnnn4c5ccccc5		IC50							9.02	uM	9.02	5.04479		A
M223	CCCCCC(C)n1c(=O)c2ccccc2nc1SCc3nnc4n3c5ccccc5c(=O)n4C		IC50							12.77	uM	12.77	4.89381		N
M113	c1ccc2c(c1)CCCN2S(=O)(=O)c3ccc(cc3N)N		IC50							16.85	uM	16.85	4.7734		N
M211	Cc1cc(cc(c1OCCN2CCCC2)C)c3[nH]c(=O)c4c(n3)cc(cc4OC)OC		DeltaTm							2.4	degC			10 uM	A
M211	Cc1cc(cc(c1OCCN2CCCC2)C)c3[nH]c(=O)c4c(n3)cc(cc4OC)OC		DeltaTm							5.7	degC			10 uM	A
M211	Cc1cc(cc(c1OCCN2CCCC2)C)c3[nH]c(=O)c4c(n3)cc(cc4OC)OC		DeltaTm							2.4	degC			10 uM	A
M211	Cc1cc(cc(c1OCCN2CCCC2)C)c3[nH]c(=O)c4c(n3)cc(cc4OC)OC		DeltaTm							8	degC			10 uM	A
M211	Cc1cc(cc(c1OCCN2CCCC2)C)c3[nH]c(=O)c4c(n3)cc(cc4OC)OC									5.1	degC				A
M211	Cc1cc(cc(c1OCCN2CCCC2)C)c3[nH]c(=O)c4c(n3)cc(cc4OC)OC									6.9	degC				A
M211	Cc1cc(cc(c1OCCN2CCCC2)C)c3[nH]c(=O)c4c(n3)cc(cc4OC)OC									2.6	degC				A
M211	Cc1cc(cc(c1OCCN2CCCC2)C)c3[nH]c(=O)c4c(n3)cc(cc4OC)OC									9.6	degC				A
M211	Cc1cc(cc(c1OCCN2CCCC2)C)c3[nH]c(=O)c4c(n3)cc(cc4OC)OC									-0.1	degC				N
M211	Cc1cc(cc(c1OCCN2CCCC2)C)c3[nH]c(=O)c4c(n3)cc(cc4OC)OC									-0.2	degC				N
M211	Cc1cc(cc(c1OCCN2CCCC2)C)c3[nH]c(=O)c4c(n3)cc(cc4OC)OC									0	degC				N
M211	Cc1cc(cc(c1OCCN2CCCC2)C)c3[nH]c(=O)c4c(n3)cc(cc4OC)OC									-0.1	degC				N
M246	Cn1cc(cn1)CCn2cnc(c2c3ccc(cc3)C#N)c4cnn(c4)C									-0.5	degC				N
M246	Cn1cc(cn1)CCn2cnc(c2c3ccc(cc3)C#N)c4cnn(c4)C									5.2	degC				A
M246	Cn1cc(cn1)CCn2cnc(c2c3ccc(cc3)C#N)c4cnn(c4)C									3.8	degC				A
M246	Cn1cc(cn1)CCn2cnc(c2c3ccc(cc3)C#N)c4cnn(c4)C									0.2	degC				N
M246	Cn1cc(cn1)CCn2cnc(c2c3ccc(cc3)C#N)c4cnn(c4)C									-0.1	degC				N
M246	Cn1cc(cn1)CCn2cnc(c2c3ccc(cc3)C#N)c4cnn(c4)C									0.2	degC				N
M246	Cn1cc(cn1)CCn2cnc(c2c3ccc(cc3)C#N)c4cnn(c4)C									-0.1	degC				N
M246	Cn1cc(cn1)CCn2cnc(c2c3ccc(cc3)C#N)c4cnn(c4)C									0.1	degC				N
M246	Cn1cc(cn1)CCn2cnc(c2c3ccc(cc3)C#N)c4cnn(c4)C									-0.1	degC				N
M246	Cn1cc(cn1)CCn2cnc(c2c3ccc(cc3)C#N)c4cnn(c4)C									0	degC				N
M246	Cn1cc(cn1)CCn2cnc(c2c3ccc(cc3)C#N)c4cnn(c4)C									-0.9	degC				N
M246	Cn1cc(cn1)CCn2cnc(c2c3ccc(cc3)C#N)c4cnn(c4)C									0.1	degC				N
M246	Cn1cc(cn1)CCn2cnc(c2c3ccc(cc3)C#N)c4cnn(c4)C									0	degC				N
M246	Cn1cc(cn1)CCn2cnc(c2c3ccc(cc3)C#N)c4cnn(c4)C									0.4	degC				N
M246	Cn1cc(cn1)CCn2cnc(c2c3ccc(cc3)C#N)c4cnn(c4)C									-0.4	degC				N
M246	Cn1cc(cn1)CCn2cnc(c2c3ccc(cc3)C#N)c4cnn(c4)C									2	degC				A
M246	Cn1cc(cn1)CCn2cnc(c2c3ccc(cc3)C#N)c4cnn(c4)C									0.5	degC				N
M246	Cn1cc(cn1)CCn2cnc(c2c3ccc(cc3)C#N)c4cnn(c4)C									0.6	degC				N
M246	Cn1cc(cn1)CCn2cnc(c2c3ccc(cc3)C#N)c4cnn(c4)C									-0.4	degC				N
M246	Cn1cc(cn1)CCn2cnc(c2c3ccc(cc3)C#N)c4cnn(c4)C									-0.4	degC				N
M246	Cn1cc(cn1)CCn2cnc(c2c3ccc(cc3)C#N)c4cnn(c4)C									0	degC				N
M246	Cn1cc(cn1)CCn2cnc(c2c3ccc(cc3)C#N)c4cnn(c4)C									0.3	degC				N
M246	Cn1cc(cn1)CCn2cnc(c2c3ccc(cc3)C#N)c4cnn(c4)C									-0.1	degC				N
M246	Cn1cc(cn1)CCn2cnc(c2c3ccc(cc3)C#N)c4cnn(c4)C									-0.2	degC				N
M246	Cn1cc(cn1)CCn2cnc(c2c3ccc(cc3)C#N)c4cnn(c4)C									-0.6	degC				N
M246	Cn1cc(cn1)CCn2cnc(c2c3ccc(cc3)C#N)c4cnn(c4)C									-0.6	degC				N
91827372	Cc1cc(=O)n(c2c1ccc(c2)N3[C@@H]([C@H](CCC3=O)NS(=O)(=O)CC(C)C)c4ccc(cc4)Cl)C		DeltaTm						<	1	degC			10 uM	N
91827372	Cc1cc(=O)n(c2c1ccc(c2)N3[C@@H]([C@H](CCC3=O)NS(=O)(=O)CC(C)C)c4ccc(cc4)Cl)C		DeltaTm						<	1	degC			10 uM	N
91827372	Cc1cc(=O)n(c2c1ccc(c2)N3[C@@H]([C@H](CCC3=O)NS(=O)(=O)CC(C)C)c4ccc(cc4)Cl)C		DeltaTm						<	1	degC			10 uM	N
91827372	Cc1cc(=O)n(c2c1ccc(c2)N3[C@@H]([C@H](CCC3=O)NS(=O)(=O)CC(C)C)c4ccc(cc4)Cl)C		DeltaTm						<	1	degC			10 uM	N
91827372	Cc1cc(=O)n(c2c1ccc(c2)N3[C@@H]([C@H](CCC3=O)NS(=O)(=O)CC(C)C)c4ccc(cc4)Cl)C		DeltaTm						<	1	degC			10 uM	N
91827372	Cc1cc(=O)n(c2c1ccc(c2)N3[C@@H]([C@H](CCC3=O)NS(=O)(=O)CC(C)C)c4ccc(cc4)Cl)C		DeltaTm						<	1	degC			10 uM	N
91827372	Cc1cc(=O)n(c2c1ccc(c2)N3[C@@H]([C@H](CCC3=O)NS(=O)(=O)CC(C)C)c4ccc(cc4)Cl)C		DeltaTm						<	1	degC			10 uM	N
91827372	Cc1cc(=O)n(c2c1ccc(c2)N3[C@@H]([C@H](CCC3=O)NS(=O)(=O)CC(C)C)c4ccc(cc4)Cl)C		DeltaTm						<	1	degC			10 uM	N
91827372	Cc1cc(=O)n(c2c1ccc(c2)N3[C@@H]([C@H](CCC3=O)NS(=O)(=O)CC(C)C)c4ccc(cc4)Cl)C		DeltaTm						<	1	degC			10 uM	N
91827372	Cc1cc(=O)n(c2c1ccc(c2)N3[C@@H]([C@H](CCC3=O)NS(=O)(=O)CC(C)C)c4ccc(cc4)Cl)C		DeltaTm						<	1	degC			10 uM	N
91827372	Cc1cc(=O)n(c2c1ccc(c2)N3[C@@H]([C@H](CCC3=O)NS(=O)(=O)CC(C)C)c4ccc(cc4)Cl)C		DeltaTm						<	1	degC			10 uM	N
91827372	Cc1cc(=O)n(c2c1ccc(c2)N3[C@@H]([C@H](CCC3=O)NS(=O)(=O)CC(C)C)c4ccc(cc4)Cl)C		DeltaTm						<	1	degC			10 uM	N
91827372	Cc1cc(=O)n(c2c1ccc(c2)N3[C@@H]([C@H](CCC3=O)NS(=O)(=O)CC(C)C)c4ccc(cc4)Cl)C		DeltaTm						>	4	degC			10 uM	A
91827372	Cc1cc(=O)n(c2c1ccc(c2)N3[C@@H]([C@H](CCC3=O)NS(=O)(=O)CC(C)C)c4ccc(cc4)Cl)C		DeltaTm						<	1	degC			10 uM	N
91827372	Cc1cc(=O)n(c2c1ccc(c2)N3[C@@H]([C@H](CCC3=O)NS(=O)(=O)CC(C)C)c4ccc(cc4)Cl)C		DeltaTm						<	1	degC			10 uM	N
91827372	Cc1cc(=O)n(c2c1ccc(c2)N3[C@@H]([C@H](CCC3=O)NS(=O)(=O)CC(C)C)c4ccc(cc4)Cl)C		DeltaTm						<	1	degC			10 uM	N
91827372	Cc1cc(=O)n(c2c1ccc(c2)N3[C@@H]([C@H](CCC3=O)NS(=O)(=O)CC(C)C)c4ccc(cc4)Cl)C		DeltaTm						<	1	degC			10 uM	N
91827372	Cc1cc(=O)n(c2c1ccc(c2)N3[C@@H]([C@H](CCC3=O)NS(=O)(=O)CC(C)C)c4ccc(cc4)Cl)C		DeltaTm						<	1	degC			10 uM	N
91827372	Cc1cc(=O)n(c2c1ccc(c2)N3[C@@H]([C@H](CCC3=O)NS(=O)(=O)CC(C)C)c4ccc(cc4)Cl)C		DeltaTm						<	1	degC			10 uM	N
91827372	Cc1cc(=O)n(c2c1ccc(c2)N3[C@@H]([C@H](CCC3=O)NS(=O)(=O)CC(C)C)c4ccc(cc4)Cl)C		DeltaTm						<	1	degC			10 uM	N
91827372	Cc1cc(=O)n(c2c1ccc(c2)N3[C@@H]([C@H](CCC3=O)NS(=O)(=O)CC(C)C)c4ccc(cc4)Cl)C		DeltaTm						<	1	degC			10 uM	N
91827372	Cc1cc(=O)n(c2c1ccc(c2)N3[C@@H]([C@H](CCC3=O)NS(=O)(=O)CC(C)C)c4ccc(cc4)Cl)C		DeltaTm						<	1	degC			10 uM	N
91827372	Cc1cc(=O)n(c2c1ccc(c2)N3[C@@H]([C@H](CCC3=O)NS(=O)(=O)CC(C)C)c4ccc(cc4)Cl)C		DeltaTm						<	1	degC			10 uM	N
91827372	Cc1cc(=O)n(c2c1ccc(c2)N3[C@@H]([C@H](CCC3=O)NS(=O)(=O)CC(C)C)c4ccc(cc4)Cl)C		DeltaTm						<	1	degC			10 uM	N
91827372	Cc1cc(=O)n(c2c1ccc(c2)N3[C@@H]([C@H](CCC3=O)NS(=O)(=O)CC(C)C)c4ccc(cc4)Cl)C		DeltaTm						<	1	degC			10 uM	N
91827372	Cc1cc(=O)n(c2c1ccc(c2)N3[C@@H]([C@H](CCC3=O)NS(=O)(=O)CC(C)C)c4ccc(cc4)Cl)C		DeltaTm						<	1	degC			10 uM	N
91827372	Cc1cc(=O)n(c2c1ccc(c2)N3[C@@H]([C@H](CCC3=O)NS(=O)(=O)CC(C)C)c4ccc(cc4)Cl)C		DeltaTm						<	1	degC			10 uM	N
91827372	Cc1cc(=O)n(c2c1ccc(c2)N3[C@@H]([C@H](CCC3=O)NS(=O)(=O)CC(C)C)c4ccc(cc4)Cl)C		DeltaTm						<	1	degC			10 uM	N
M228	CCCO/C(=C/c1c(cc(n1C)C(=O)C)c2ccccn2)/C=C		DeltaTm							1.1	degC			10 uM	A
M128	CC(=O)c1cc(c(n1C)/C=C(\C=C)/N2CCOCC2)c3ccccn3		DeltaTm							5.7	degC			10 uM	A
M124	CC(=O)c1cc(c(n1C)/C=C(\C=C)/N2CCOCC2)c3cccc(n3)Cl		DeltaTm							0.81	degC			10 uM	N
M229	CCCO/C(=C/c1c(cc(n1C)C(=O)C)c2cccc(n2)Cl)/C=C		DeltaTm							0.085	degC			10 uM	N
M215	Cc1cccc(n1)c2cc(n(c2/C=C(\C=C)/N3CCOCC3)C)C(=O)C		DeltaTm							4.2	degC			10 uM	A
M125	CC(=O)c1cc(c(n1C)/C=C(\C=C)/N2CCOCC2)c3cccc(n3)OC		DeltaTm							1.3	degC			10 uM	A
M123	CC(=O)c1cc(c(n1C)/C=C(\C=C)/N2CCOCC2)c3ccc(cn3)Cl		DeltaTm							-0.23	degC			10 uM	N
M122	CC(=O)c1cc(c(n1C)/C=C(\C=C)/N2CCOCC2)c3ccc(cn3)C(F)(F)F		DeltaTm							-1.1	degC			10 uM	N
M121	CC(=O)c1cc(c(n1C)/C=C(\C=C)/N2CCOCC2)c3cc(ccn3)C(=O)OC		DeltaTm							0.35	degC			10 uM	N
M224	CCCO/C(=C/c1c(cc(n1C)C(=O)C)c2cc(ccn2)C(=O)OC)/C=C		DeltaTm							-0.03	degC			10 uM	N
M120	CC(=O)c1cc(c(n1C)/C=C(\C=C)/N2CCOCC2)c3cc(ccn3)C(=O)O		DeltaTm							-0.06	degC			10 uM	N
M119	CC(=O)c1cc(c(n1C)/C=C(\C=C)/N2CCOCC2)c3c(cccn3)F		DeltaTm							1.3	degC			10 uM	A
M212	Cc1cc(c(nc1)c2cc(n(c2/C=C(\C=C)/N3CCOCC3)C)C(=O)C)F		DeltaTm							-0.28	degC			10 uM	N
M130	CC(=O)c1cc(c(n1C)/C=C(\C=C)/N2CCOCC2)c3ncccn3		DeltaTm							0.035	degC			10 uM	N
M129	CC(=O)c1cc(c(n1C)/C=C(\C=C)/N2CCOCC2)c3nc4ccccc4s3		DeltaTm							-0.3	degC			10 uM	N
M126	CC(=O)c1cc(c(n1C)/C=C(\C=C)/N2CCOCC2)c3cccc4n3ccn4		DeltaTm							4.5	degC			10 uM	A
M118	CC(=O)c1cc(c(n1C)/C=C(\C=C)/N2CCNCC2)c3ccccn3		DeltaTm							5.7	degC			10 uM	A
M117	CC(=O)c1cc(c(n1C)/C=C(\C=C)/N2CCNCC2)c3cccc4n3ccn4		DeltaTm							5.1	degC			10 uM	A
M116	CC(=O)c1cc(c(n1C)/C=C(\C=C)/N2CCN(CC2)C)c3cccc4n3ccn4		DeltaTm							7.5	degC			10 uM	A
M220	CCC(=O)c1cc(c(n1C)/C=C(\C=C)/N2CCOCC2)c3cccc4n3ccn4		DeltaTm							3	degC			10 uM	A
M237	Cn1c(cc(c1/C=C(\C=C)/N2CCOCC2)c3cccc4n3ccn4)C(=O)C(F)(F)F		DeltaTm							0.26	degC			10 uM	N
M221	CCC(=O)c1cc(c(n1C)/C=C(\C=C)/N2CCN(CC2)C)c3cccc4n3ccn4		DeltaTm							1.2	degC			10 uM	A
M148	CC(C)C(=O)c1cc(c(n1C)/C=C(\C=C)/N2CCN(CC2)C)c3cccc4n3ccn4		DeltaTm							1	degC			10 uM	A
M225	CCCC(=O)c1cc(c(n1C)/C=C(\C=C)/N2CCN(CC2)C)c3cccc4n3ccn4		DeltaTm							0.76	degC			10 uM	N
M226	CCCCC(=O)c1cc(c(n1C)/C=C(\C=C)/N2CCN(CC2)C)c3cccc4n3ccn4		DeltaTm							0.27	degC			10 uM	N
M238	Cn1c(cc(c1/C=C(\C=C)/N2CCN(CC2)C)c3cccc4n3ccn4)C(=O)C(F)(F)F		DeltaTm							0.3	degC			10 uM	N
M228	CCCO/C(=C/c1c(cc(n1C)C(=O)C)c2ccccn2)/C=C		DeltaTm							-0.35	degC			10 uM	N
M128	CC(=O)c1cc(c(n1C)/C=C(\C=C)/N2CCOCC2)c3ccccn3		DeltaTm							1.9	degC			10 uM	A
M124	CC(=O)c1cc(c(n1C)/C=C(\C=C)/N2CCOCC2)c3cccc(n3)Cl		DeltaTm							0.28	degC			10 uM	N
M229	CCCO/C(=C/c1c(cc(n1C)C(=O)C)c2cccc(n2)Cl)/C=C		DeltaTm							-0.6	degC			10 uM	N
M215	Cc1cccc(n1)c2cc(n(c2/C=C(\C=C)/N3CCOCC3)C)C(=O)C		DeltaTm							1.2	degC			10 uM	A
M125	CC(=O)c1cc(c(n1C)/C=C(\C=C)/N2CCOCC2)c3cccc(n3)OC		DeltaTm							0.82	degC			10 uM	N
M123	CC(=O)c1cc(c(n1C)/C=C(\C=C)/N2CCOCC2)c3ccc(cn3)Cl		DeltaTm							-0.39	degC			10 uM	N
M122	CC(=O)c1cc(c(n1C)/C=C(\C=C)/N2CCOCC2)c3ccc(cn3)C(F)(F)F		DeltaTm							-4	degC			10 uM	A
M121	CC(=O)c1cc(c(n1C)/C=C(\C=C)/N2CCOCC2)c3cc(ccn3)C(=O)OC		DeltaTm							0.075	degC			10 uM	N
M224	CCCO/C(=C/c1c(cc(n1C)C(=O)C)c2cc(ccn2)C(=O)OC)/C=C		DeltaTm							-0.24	degC			10 uM	N
M120	CC(=O)c1cc(c(n1C)/C=C(\C=C)/N2CCOCC2)c3cc(ccn3)C(=O)O		DeltaTm							-0.24	degC			10 uM	N
M119	CC(=O)c1cc(c(n1C)/C=C(\C=C)/N2CCOCC2)c3c(cccn3)F		DeltaTm							0.41	degC			10 uM	N
M212	Cc1cc(c(nc1)c2cc(n(c2/C=C(\C=C)/N3CCOCC3)C)C(=O)C)F		DeltaTm							-0.42	degC			10 uM	N
M130	CC(=O)c1cc(c(n1C)/C=C(\C=C)/N2CCOCC2)c3ncccn3		DeltaTm							0.43	degC			10 uM	N
M129	CC(=O)c1cc(c(n1C)/C=C(\C=C)/N2CCOCC2)c3nc4ccccc4s3		DeltaTm							0.55	degC			10 uM	N
M126	CC(=O)c1cc(c(n1C)/C=C(\C=C)/N2CCOCC2)c3cccc4n3ccn4		DeltaTm							1.3	degC			10 uM	A
M118	CC(=O)c1cc(c(n1C)/C=C(\C=C)/N2CCNCC2)c3ccccn3		DeltaTm							4	degC			10 uM	A
M117	CC(=O)c1cc(c(n1C)/C=C(\C=C)/N2CCNCC2)c3cccc4n3ccn4		DeltaTm							2.6	degC			10 uM	A
M116	CC(=O)c1cc(c(n1C)/C=C(\C=C)/N2CCN(CC2)C)c3cccc4n3ccn4		DeltaTm							4.1	degC			10 uM	A
M220	CCC(=O)c1cc(c(n1C)/C=C(\C=C)/N2CCOCC2)c3cccc4n3ccn4		DeltaTm							0.98	degC			10 uM	N
M237	Cn1c(cc(c1/C=C(\C=C)/N2CCOCC2)c3cccc4n3ccn4)C(=O)C(F)(F)F		DeltaTm							-0.4	degC			10 uM	N
M221	CCC(=O)c1cc(c(n1C)/C=C(\C=C)/N2CCN(CC2)C)c3cccc4n3ccn4		DeltaTm							0.51	degC			10 uM	N
M148	CC(C)C(=O)c1cc(c(n1C)/C=C(\C=C)/N2CCN(CC2)C)c3cccc4n3ccn4		DeltaTm							0.19	degC			10 uM	N
M225	CCCC(=O)c1cc(c(n1C)/C=C(\C=C)/N2CCN(CC2)C)c3cccc4n3ccn4		DeltaTm							-0.65	degC			10 uM	N
M226	CCCCC(=O)c1cc(c(n1C)/C=C(\C=C)/N2CCN(CC2)C)c3cccc4n3ccn4		DeltaTm							-0.78	degC			10 uM	N
M238	Cn1c(cc(c1/C=C(\C=C)/N2CCN(CC2)C)c3cccc4n3ccn4)C(=O)C(F)(F)F		DeltaTm							-0.7	degC			10 uM	N
M228	CCCO/C(=C/c1c(cc(n1C)C(=O)C)c2ccccn2)/C=C		DeltaTm							0.32	degC			10 uM	N
M128	CC(=O)c1cc(c(n1C)/C=C(\C=C)/N2CCOCC2)c3ccccn3		DeltaTm							1.3	degC			10 uM	A
M124	CC(=O)c1cc(c(n1C)/C=C(\C=C)/N2CCOCC2)c3cccc(n3)Cl		DeltaTm							0.34	degC			10 uM	N
M229	CCCO/C(=C/c1c(cc(n1C)C(=O)C)c2cccc(n2)Cl)/C=C		DeltaTm							-0.18	degC			10 uM	N
M215	Cc1cccc(n1)c2cc(n(c2/C=C(\C=C)/N3CCOCC3)C)C(=O)C		DeltaTm							0.65	degC			10 uM	N
M125	CC(=O)c1cc(c(n1C)/C=C(\C=C)/N2CCOCC2)c3cccc(n3)OC		DeltaTm							0.53	degC			10 uM	N
M123	CC(=O)c1cc(c(n1C)/C=C(\C=C)/N2CCOCC2)c3ccc(cn3)Cl		DeltaTm							-0.22	degC			10 uM	N
M122	CC(=O)c1cc(c(n1C)/C=C(\C=C)/N2CCOCC2)c3ccc(cn3)C(F)(F)F		DeltaTm							-2.5	degC			10 uM	N
M121	CC(=O)c1cc(c(n1C)/C=C(\C=C)/N2CCOCC2)c3cc(ccn3)C(=O)OC		DeltaTm							-0.04	degC			10 uM	N
M224	CCCO/C(=C/c1c(cc(n1C)C(=O)C)c2cc(ccn2)C(=O)OC)/C=C		DeltaTm							-0.09	degC			10 uM	N
M120	CC(=O)c1cc(c(n1C)/C=C(\C=C)/N2CCOCC2)c3cc(ccn3)C(=O)O		DeltaTm							-0.01	degC			10 uM	N
M119	CC(=O)c1cc(c(n1C)/C=C(\C=C)/N2CCOCC2)c3c(cccn3)F		DeltaTm							0.71	degC			10 uM	N
M212	Cc1cc(c(nc1)c2cc(n(c2/C=C(\C=C)/N3CCOCC3)C)C(=O)C)F		DeltaTm							-0.48	degC			10 uM	N
M130	CC(=O)c1cc(c(n1C)/C=C(\C=C)/N2CCOCC2)c3ncccn3		DeltaTm							0.29	degC			10 uM	N
M129	CC(=O)c1cc(c(n1C)/C=C(\C=C)/N2CCOCC2)c3nc4ccccc4s3		DeltaTm							0.04	degC			10 uM	N
M126	CC(=O)c1cc(c(n1C)/C=C(\C=C)/N2CCOCC2)c3cccc4n3ccn4		DeltaTm							1.7	degC			10 uM	A
M118	CC(=O)c1cc(c(n1C)/C=C(\C=C)/N2CCNCC2)c3ccccn3		DeltaTm							1.7	degC			10 uM	A
M117	CC(=O)c1cc(c(n1C)/C=C(\C=C)/N2CCNCC2)c3cccc4n3ccn4		DeltaTm							2.3	degC			10 uM	A
M116	CC(=O)c1cc(c(n1C)/C=C(\C=C)/N2CCN(CC2)C)c3cccc4n3ccn4		DeltaTm							3.5	degC			10 uM	A
M220	CCC(=O)c1cc(c(n1C)/C=C(\C=C)/N2CCOCC2)c3cccc4n3ccn4		DeltaTm							0.2	degC			10 uM	N
M237	Cn1c(cc(c1/C=C(\C=C)/N2CCOCC2)c3cccc4n3ccn4)C(=O)C(F)(F)F		DeltaTm							0.2	degC			10 uM	N
M221	CCC(=O)c1cc(c(n1C)/C=C(\C=C)/N2CCN(CC2)C)c3cccc4n3ccn4		DeltaTm							-0.15	degC			10 uM	N
M148	CC(C)C(=O)c1cc(c(n1C)/C=C(\C=C)/N2CCN(CC2)C)c3cccc4n3ccn4		DeltaTm							0.71	degC			10 uM	N
M225	CCCC(=O)c1cc(c(n1C)/C=C(\C=C)/N2CCN(CC2)C)c3cccc4n3ccn4		DeltaTm							-0.085	degC			10 uM	N
M226	CCCCC(=O)c1cc(c(n1C)/C=C(\C=C)/N2CCN(CC2)C)c3cccc4n3ccn4		DeltaTm							-0.5	degC			10 uM	N
M238	Cn1c(cc(c1/C=C(\C=C)/N2CCN(CC2)C)c3cccc4n3ccn4)C(=O)C(F)(F)F		DeltaTm							-0.26	degC			10 uM	N
M228	CCCO/C(=C/c1c(cc(n1C)C(=O)C)c2ccccn2)/C=C		pIC50							5.6			5.6		A
M128	CC(=O)c1cc(c(n1C)/C=C(\C=C)/N2CCOCC2)c3ccccn3		pIC50							5.5			5.5		A
M126	CC(=O)c1cc(c(n1C)/C=C(\C=C)/N2CCOCC2)c3cccc4n3ccn4		pIC50						<	4			4		N
M144	CC(=O)c1cc(c(n1C)/C=C\C=C)c2ccccn2		IC50							1.5	uM	1.5	5.82391		A
M140	CC(=O)c1cc(c(n1C)/C=C\C=C)c2cccc(c2)OC		IC50						>	30	uM	30	4.52288		N
M145	CC(=O)c1cc(c(n1C)/C=C\C=C)c2cccs2		IC50							8.6	uM	8.6	5.0655		A
M139	CC(=O)c1cc(c(n1C)/C=C\C=C)c2cccc(c2)O		IC50							3.3	uM	3.3	5.48149		A
M141	CC(=O)c1cc(c(n1C)/C=C\C=C)c2ccccc2CO		IC50							1.8	uM	1.8	5.74473		A
M138	CC(=O)c1cc(c(n1C)/C=C\C=C)c2cccc(c2)C(=O)N		IC50							1.8	uM	1.8	5.74473		A
M137	CC(=O)c1cc(c(n1C)/C=C\C=C)c2ccc(cc2CO)OC		IC50							1.4	uM	1.4	5.85387		A
M135	CC(=O)c1cc(c(n1C)/C=C\C=C)c2ccc(cc2)CO		IC50							1.2	uM	1.2	5.92082		A
M136	CC(=O)c1cc(c(n1C)/C=C\C=C)c2ccc(cc2)N(C)C		IC50							1.1	uM	1.1	5.95861		A
M143	CC(=O)c1cc(c(n1C)/C=C\C=C)c2ccccc2S(=O)(=O)C		IC50							0.72	uM	0.72	6.14267		A
M114	CC(=O)c1cc(c(n1C)/C=C(/CNC(=O)OC(C)(C)C)\C=C)c2ccccc2S(=O)(=O)C		IC50							0.16	uM	0.16	6.79588		A
M230	CCCO/C(=C/c1c(cc(n1C)C(=O)C)c2ccccc2S(=O)(=O)C)/C=C		IC50							0.4	uM	0.4	6.39794		A
M134	CC(=O)c1cc(c(n1C)/C=C(\C=C)/Oc2ccccc2)c3ccccc3S(=O)(=O)C		IC50							0.55	uM	0.55	6.25964		A
M132	CC(=O)c1cc(c(n1C)/C=C(\C=C)/OC)c2ccccc2S(=O)(=O)C		IC50							0.58	uM	0.58	6.23657		A
M101	C/C(=C/c1c(cc(n1C)C(=O)C)c2ccccc2S(=O)(=O)C)/C=C		IC50							0.89	uM	0.89	6.05061		A
M100	C/C(=C/c1c(cc(n1C)C(=O)C)c2ccccc2CO)/C=C		IC50							1	uM	1	6		A
M131	CC(=O)c1cc(c(n1C)/C=C(\C=C)/OC)c2ccccc2CO		IC50							1.2	uM	1.2	5.92082		A
M127	CC(=O)c1cc(c(n1C)/C=C(\C=C)/N2CCOCC2)c3ccccc3CO		IC50							1.7	uM	1.7	5.76955		A
M115	CC(=O)c1cc(c(n1C)/C=C(\C=C)/C(=O)N)c2ccccc2CO		IC50							4.1	uM	4.1	5.38722		A
M133	CC(=O)c1cc(c(n1C)/C=C(\C=C)/Oc2ccccc2)c3ccccc3CO		IC50							4.1	uM	4.1	5.38722		A
M144	CC(=O)c1cc(c(n1C)/C=C\C=C)c2ccccn2		IC50							7		7	5.1549		A
M140	CC(=O)c1cc(c(n1C)/C=C\C=C)c2cccc(c2)OC		IC50						>	30		30	4.52288		N
M145	CC(=O)c1cc(c(n1C)/C=C\C=C)c2cccs2		IC50							34.1		34.1	4.46725		N
M142	CC(=O)c1cc(c(n1C)/C=C\C=C)c2ccccc2O		IC50							22.7		22.7	4.64397		N
M139	CC(=O)c1cc(c(n1C)/C=C\C=C)c2cccc(c2)O		IC50							12.5		12.5	4.90309		N
M141	CC(=O)c1cc(c(n1C)/C=C\C=C)c2ccccc2CO		IC50							1		1	6		A
M138	CC(=O)c1cc(c(n1C)/C=C\C=C)c2cccc(c2)C(=O)N		IC50							9.8		9.8	5.00877		A
M137	CC(=O)c1cc(c(n1C)/C=C\C=C)c2ccc(cc2CO)OC		IC50							1.5		1.5	5.82391		A
M135	CC(=O)c1cc(c(n1C)/C=C\C=C)c2ccc(cc2)CO		IC50							4.1		4.1	5.38722		A
M136	CC(=O)c1cc(c(n1C)/C=C\C=C)c2ccc(cc2)N(C)C		IC50							3.8		3.8	5.42022		A
M143	CC(=O)c1cc(c(n1C)/C=C\C=C)c2ccccc2S(=O)(=O)C		IC50							1.3		1.3	5.88606		A
M114	CC(=O)c1cc(c(n1C)/C=C(/CNC(=O)OC(C)(C)C)\C=C)c2ccccc2S(=O)(=O)C		IC50							0.67		0.67	6.17393		A
M230	CCCO/C(=C/c1c(cc(n1C)C(=O)C)c2ccccc2S(=O)(=O)C)/C=C		IC50							0.43		0.43	6.36653		A
M134	CC(=O)c1cc(c(n1C)/C=C(\C=C)/Oc2ccccc2)c3ccccc3S(=O)(=O)C		IC50							0.84		0.84	6.07572		A
M132	CC(=O)c1cc(c(n1C)/C=C(\C=C)/OC)c2ccccc2S(=O)(=O)C		IC50							0.82		0.82	6.08619		A
M101	C/C(=C/c1c(cc(n1C)C(=O)C)c2ccccc2S(=O)(=O)C)/C=C		IC50							1.9		1.9	5.72125		A
M100	C/C(=C/c1c(cc(n1C)C(=O)C)c2ccccc2CO)/C=C		IC50							0.37		0.37	6.4318		A
M131	CC(=O)c1cc(c(n1C)/C=C(\C=C)/OC)c2ccccc2CO		IC50							0.41		0.41	6.38722		A
M127	CC(=O)c1cc(c(n1C)/C=C(\C=C)/N2CCOCC2)c3ccccc3CO		IC50							0.54		0.54	6.26761		A
M115	CC(=O)c1cc(c(n1C)/C=C(\C=C)/C(=O)N)c2ccccc2CO		IC50							1.9		1.9	5.72125		A
M133	CC(=O)c1cc(c(n1C)/C=C(\C=C)/Oc2ccccc2)c3ccccc3CO		IC50							0.61		0.61	6.21467		A
M141	CC(=O)c1cc(c(n1C)/C=C\C=C)c2ccccc2CO		IC50							38.9		38.9	4.41005		N
M143	CC(=O)c1cc(c(n1C)/C=C\C=C)c2ccccc2S(=O)(=O)C		IC50						>	50		50	4.30103		N
M114	CC(=O)c1cc(c(n1C)/C=C(/CNC(=O)OC(C)(C)C)\C=C)c2ccccc2S(=O)(=O)C		IC50						>	50		50	4.30103		N
M230	CCCO/C(=C/c1c(cc(n1C)C(=O)C)c2ccccc2S(=O)(=O)C)/C=C		IC50						>	50		50	4.30103		N
M134	CC(=O)c1cc(c(n1C)/C=C(\C=C)/Oc2ccccc2)c3ccccc3S(=O)(=O)C		IC50						>	50		50	4.30103		N
M132	CC(=O)c1cc(c(n1C)/C=C(\C=C)/OC)c2ccccc2S(=O)(=O)C		IC50						>	50		50	4.30103		N
M141	CC(=O)c1cc(c(n1C)/C=C\C=C)c2ccccc2CO		IC50							23.7		23.7	4.62525		N
M143	CC(=O)c1cc(c(n1C)/C=C\C=C)c2ccccc2S(=O)(=O)C		IC50							17.9		17.9	4.74715		N
M114	CC(=O)c1cc(c(n1C)/C=C(/CNC(=O)OC(C)(C)C)\C=C)c2ccccc2S(=O)(=O)C		IC50							1.4		1.4	5.85387		A
M230	CCCO/C(=C/c1c(cc(n1C)C(=O)C)c2ccccc2S(=O)(=O)C)/C=C		IC50						>	50		50	4.30103		N
M134	CC(=O)c1cc(c(n1C)/C=C(\C=C)/Oc2ccccc2)c3ccccc3S(=O)(=O)C		IC50							19.9		19.9	4.70115		N
M132	CC(=O)c1cc(c(n1C)/C=C(\C=C)/OC)c2ccccc2S(=O)(=O)C		IC50						>	50		50	4.30103		N
86208116	Cc1c(c(on1)C)c2ccc(cc2)c3c(n4ccncc4n3)NC(C)(C)C		Kd							40000	nM	40	4.39794		N
86208116	Cc1c(c(on1)C)c2ccc(cc2)c3c(n4ccncc4n3)NC(C)(C)C		Kd							40000	nM	40	4.39794		N
86208116	Cc1c(c(on1)C)c2ccc(cc2)c3c(n4ccncc4n3)NC(C)(C)C		Kd							40000	nM	40	4.39794		N
86208116	Cc1c(c(on1)C)c2ccc(cc2)c3c(n4ccncc4n3)NC(C)(C)C		Kd							40000	nM	40	4.39794		N
86208116	Cc1c(c(on1)C)c2ccc(cc2)c3c(n4ccncc4n3)NC(C)(C)C		Kd							40000	nM	40	4.39794		N
86208116	Cc1c(c(on1)C)c2ccc(cc2)c3c(n4ccncc4n3)NC(C)(C)C		Kd							94	nM	0.094	7.02687		A
86208116	Cc1c(c(on1)C)c2ccc(cc2)c3c(n4ccncc4n3)NC(C)(C)C		Kd							95	nM	0.095	7.02228		A
86208116	Cc1c(c(on1)C)c2ccc(cc2)c3c(n4ccncc4n3)NC(C)(C)C		Kd							35	nM	0.035	7.45593		A
86208116	Cc1c(c(on1)C)c2ccc(cc2)c3c(n4ccncc4n3)NC(C)(C)C		Kd							38	nM	0.038	7.42022		A
86208116	Cc1c(c(on1)C)c2ccc(cc2)c3c(n4ccncc4n3)NC(C)(C)C		Kd							31	nM	0.031	7.50864		A
86208116	Cc1c(c(on1)C)c2ccc(cc2)c3c(n4ccncc4n3)NC(C)(C)C		Kd							40000	nM	40	4.39794		N
86208116	Cc1c(c(on1)C)c2ccc(cc2)c3c(n4ccncc4n3)NC(C)(C)C		Kd							110	nM	0.11	6.95861		A
86208116	Cc1c(c(on1)C)c2ccc(cc2)c3c(n4ccncc4n3)NC(C)(C)C		Kd							75	nM	0.075	7.12494		A
86208116	Cc1c(c(on1)C)c2ccc(cc2)c3c(n4ccncc4n3)NC(C)(C)C		Kd							40000	nM	40	4.39794		N
86208116	Cc1c(c(on1)C)c2ccc(cc2)c3c(n4ccncc4n3)NC(C)(C)C		Kd							40000	nM	40	4.39794		N
86208116	Cc1c(c(on1)C)c2ccc(cc2)c3c(n4ccncc4n3)NC(C)(C)C		Kd							4500	nM	4.5	5.34679		A
86208116	Cc1c(c(on1)C)c2ccc(cc2)c3c(n4ccncc4n3)NC(C)(C)C		Kd							4500	nM	4.5	5.34679		A
86208116	Cc1c(c(on1)C)c2ccc(cc2)c3c(n4ccncc4n3)NC(C)(C)C		Kd							40000	nM	40	4.39794		N
86208116	Cc1c(c(on1)C)c2ccc(cc2)c3c(n4ccncc4n3)NC(C)(C)C		Kd							560	nM	0.56	6.25181		A
86208116	Cc1c(c(on1)C)c2ccc(cc2)c3c(n4ccncc4n3)NC(C)(C)C		Kd							1300	nM	1.3	5.88606		A
86208116	Cc1c(c(on1)C)c2ccc(cc2)c3c(n4ccncc4n3)NC(C)(C)C		Kd							40000	nM	40	4.39794		N
86208116	Cc1c(c(on1)C)c2ccc(cc2)c3c(n4ccncc4n3)NC(C)(C)C		Kd							40000	nM	40	4.39794		N
86208116	Cc1c(c(on1)C)c2ccc(cc2)c3c(n4ccncc4n3)NC(C)(C)C		Kd							40000	nM	40	4.39794		N
M216	Cc1ccc(cc1NS(=O)(=O)c2ccc(c(c2)Cl)Cl)c3cc(c4nnc(n4n3)C)N		DeltaTm							4.3	degC			10 uM	A
12726857	C1=CC=C(C=C1)C2=NN3C(=NN=C3C(F)(F)F)C=C2		DeltaTm							-1.6	degC			10 uM	N
76314856	COC1=CC=C(C=C1)C2=NN3C(=NN=C3C(F)(F)F)C=C2		DeltaTm							0	degC			10 uM	N
M216	Cc1ccc(cc1NS(=O)(=O)c2ccc(c(c2)Cl)Cl)c3cc(c4nnc(n4n3)C)N		DeltaTm							3.7	degC			10 uM	A
76329338	CCOC(=O)N(C1=C(C=CC(=C1)C2=NN3C(=NN=C3C(=C2)N)C)C)S(=O)(=O)C4=CC=C(C=C4)Cl		DeltaTm							2	degC			10 uM	A
12726857	C1=CC=C(C=C1)C2=NN3C(=NN=C3C(F)(F)F)C=C2		DeltaTm							-3.5	degC			10 uM	N
76314856	COC1=CC=C(C=C1)C2=NN3C(=NN=C3C(F)(F)F)C=C2		DeltaTm							-1.3	degC			10 uM	N
M216	Cc1ccc(cc1NS(=O)(=O)c2ccc(c(c2)Cl)Cl)c3cc(c4nnc(n4n3)C)N		DeltaTm							6.7	degC			10 uM	A
76329338	CCOC(=O)N(C1=C(C=CC(=C1)C2=NN3C(=NN=C3C(=C2)N)C)C)S(=O)(=O)C4=CC=C(C=C4)Cl		DeltaTm							4.3	degC			10 uM	A
M216	Cc1ccc(cc1NS(=O)(=O)c2cccc(c2)Cl)c3cc(c4nnc(n4n3)C)N		DeltaTm							1	degC			10 uM	A
76329338	CCOC(=O)N(C1=C(C=CC(=C1)C2=NN3C(=NN=C3C(=C2)N)C)C)S(=O)(=O)C4=CC=C(C=C4)Cl		DeltaTm							1.7	degC			10 uM	A
M216	Cc1ccc(cc1NS(=O)(=O)c2ccc(c(c2)Cl)Cl)c3cc(c4nnc(n4n3)C)N		DeltaTm							3.1	degC			10 uM	A
M216	Cc1ccc(cc1NS(=O)(=O)c2cccc(c2)Cl)c3cc(c4nnc(n4n3)C)N		DeltaTm							3	degC			10 uM	A
M216	Cc1ccc(cc1NS(=O)(=O)c2ccc(c(c2)Cl)Cl)c3cc(c4nnc(n4n3)C)N		DeltaTm							4.3	degC			10 uM	A
12726857	C1=CC=C(C=C1)C2=NN3C(=NN=C3C(F)(F)F)C=C2		DeltaTm							1.3	degC			10 uM	A
76314856	COC1=CC=C(C=C1)C2=NN3C(=NN=C3C(F)(F)F)C=C2		DeltaTm							1.3	degC			10 uM	A
M216	Cc1ccc(cc1NS(=O)(=O)c2ccc(c(c2)Cl)Cl)c3cc(c4nnc(n4n3)C)N		DeltaTm							8	degC			10 uM	A
76329338	CCOC(=O)N(C1=C(C=CC(=C1)C2=NN3C(=NN=C3C(=C2)N)C)C)S(=O)(=O)C4=CC=C(C=C4)Cl		DeltaTm							4.3	degC			10 uM	A
M216	Cc1ccc(cc1NS(=O)(=O)c2ccc(c(c2)Cl)Cl)c3cc(c4nnc(n4n3)C)N		DeltaTm							1.8	degC			10 uM	A
M167	CC1C(=O)Nc2cccc(c2N1)C(=O)NCCCN3CCCc4c3cccc4		IC50							0.76	uM		0.76	6.11919	A
M166	CC1C(=O)Nc2cccc(c2N1)C(=O)NCCCN3CCCc4c3cc(cc4)OC		IC50							0.32	uM		0.32	6.49485	A
M166	CC1C(=O)Nc2cccc(c2N1)C(=O)NCCCN3CCCc4c3cc(cc4)OC		DeltaTm							-0.5	degC			10 uM	N
M166	CC1C(=O)Nc2cccc(c2N1)C(=O)NCCCN3CCCc4c3cc(cc4)OC		DeltaTm							-1.1	degC			10 uM	N
M166	CC1C(=O)Nc2cccc(c2N1)C(=O)NCCCN3CCCc4c3cc(cc4)OC		DeltaTm							0.5	degC			10 uM	N
M166	CC1C(=O)Nc2cccc(c2N1)C(=O)NCCCN3CCCc4c3cc(cc4)OC		DeltaTm							0	degC			10 uM	N
M166	CC1C(=O)Nc2cccc(c2N1)C(=O)NCCCN3CCCc4c3cc(cc4)OC		DeltaTm							0.7	degC			10 uM	N
M179	Cc1c(c(on1)C)c2ccc3c(c2)nc(n3CCN4CCC4)CCc5ccccc5		DeltaTm							0.27	degC			10 uM	N
M180	Cc1c(c(on1)C)c2ccc3c(c2)nc(n3CCN4CCCC4)CCc5ccccc5		DeltaTm							4.4	degC			10 uM	A
M182	Cc1c(c(on1)C)c2ccc3c(c2)nc(n3CCN4CCCCC4)CCc5ccccc5		DeltaTm							5.4	degC			10 uM	A
72201025	Cc1c(c(on1)C)c2ccc3c(c2)nc(n3CCN4CCOCC4)CCc5ccccc5		DeltaTm							6.5	degC			10 uM	A
M186	Cc1c(c(on1)C)c2ccc3c(c2)nc(n3CCN4CCN(CC4)C)CCc5ccccc5		DeltaTm							3.9	degC			10 uM	A
M188	Cc1c(c(on1)C)c2ccc3c(c2)nc(n3CCN4CCNCC4)CCc5ccccc5		DeltaTm							2	degC			10 uM	A
M213	Cc1c(c(on1)C)c2ccc3c(c2)nc(n3CCN4CCSCC4)CCc5ccccc5		DeltaTm							6.5	degC			10 uM	A
M178	Cc1c(c(on1)C)c2ccc3c(c2)nc(n3CCN4C[C@H](O[C@H](C4)C)C)CCc5ccccc5		DeltaTm							6.6	degC			10 uM	A
M222	Cc1ccccc1CCc2nc3cc(ccc3n2CCN4CCOCC4)c5c(noc5C)C		DeltaTm							6.4	degC			10 uM	A
M218	Cc1cccc(c1)CCc2nc3cc(ccc3n2CCN4CCOCC4)c5c(noc5C)C		DeltaTm							6.3	degC			10 uM	A
M214	Cc1ccc(cc1)CCc2nc3cc(ccc3n2CCN4CCOCC4)c5c(noc5C)C		DeltaTm							7.4	degC			10 uM	A
M202	Cc1c(c(on1)C)c2ccc3c(c2)nc(n3CCN4CCOCC4)CCc5ccc(cc5)OC		DeltaTm							8.1	degC			10 uM	A
M203	Cc1c(c(on1)C)c2ccc3c(c2)nc(n3CCN4CCOCC4)CCc5cccc(c5)N(=O)=O		DeltaTm							5.2	degC			10 uM	A
M201	Cc1c(c(on1)C)c2ccc3c(c2)nc(n3CCN4CCOCC4)CCc5ccc(cc5)N(=O)=O		DeltaTm							5.2	degC			10 uM	A
M205	Cc1c(c(on1)C)c2ccc3c(c2)nc(n3CCN4CCOCC4)CCc5ccccc5F		DeltaTm							6.2	degC			10 uM	A
M204	Cc1c(c(on1)C)c2ccc3c(c2)nc(n3CCN4CCOCC4)CCc5cccc(c5)F		DeltaTm							7.1	degC			10 uM	A
M200	Cc1c(c(on1)C)c2ccc3c(c2)nc(n3CCN4CCOCC4)CCc5ccc(cc5)F		DeltaTm							6.4	degC			10 uM	A
M198	Cc1c(c(on1)C)c2ccc3c(c2)nc(n3CCN4CCOCC4)CCc5ccc(c(c5)Cl)OC		DeltaTm							9	degC			10 uM	A
M199	Cc1c(c(on1)C)c2ccc3c(c2)nc(n3CCN4CCOCC4)CCc5ccc(c(c5)F)OC		DeltaTm							9.6	degC			10 uM	A
M206	Cc1c(c(on1)C)c2ccc3c(c2)nc(n3CCN4CCOCC4)CCc5cccs5		DeltaTm							6	degC			10 uM	A
M207	Cc1c(c(on1)C)c2ccc3c(c2)nc(n3CCN4CCOCC4)CCc5nc6ccccc6s5		DeltaTm							6.2	degC			10 uM	A
M208	Cc1c(c(on1)C)c2ccc3c(c2)nc(n3CCN4CCOCC4)CCn5ccc6c5cccc6		DeltaTm							8.9	degC			10 uM	A
M168	Cc1c(c(on1)C)c2ccc3c(c2)cc(n3CCN4CCOCC4)CCc5ccc(c(c5)Cl)OC		DeltaTm							2	degC			10 uM	A
M209	Cc1c(c(on1)C)c2ccc3c(c2)nc(n3CCN4CCOCC4)OCc5ccccc5		DeltaTm							4.9	degC			10 uM	A
M210	Cc1c(c(on1)C)c2ccc3c(c2)nc(n3CCN4CCOCC4)COc5ccc(c(c5)F)OC		DeltaTm							6.8	degC			10 uM	A
M191	Cc1c(c(on1)C)c2ccc3c(c2)nc(n3CCN4CCOCC4)C[C@@H](C)c5ccccc5		DeltaTm							7.2	degC			10 uM	A
M189	Cc1c(c(on1)C)c2ccc3c(c2)nc(n3CCN4CCOCC4)C(C)Cc5ccccc5		DeltaTm							8.9	degC			10 uM	A
M190	Cc1c(c(on1)C)c2ccc3c(c2)nc(n3CCN4CCOCC4)C(Cc5ccccc5)O		DeltaTm							3.6	degC			10 uM	A
M195	Cc1c(c(on1)C)c2ccc3c(c2)nc(n3CCN4CCOCC4)C5Cc6ccccc6O5		DeltaTm							3.9	degC			10 uM	A
M194	Cc1c(c(on1)C)c2ccc3c(c2)nc(n3CCN4CCOCC4)C5Cc6ccccc6C5		DeltaTm							4.9	degC			10 uM	A
M196	Cc1c(c(on1)C)c2ccc3c(c2)nc(n3CCN4CCOCC4)C5CCc6ccccc6C5		DeltaTm							5.8	degC			10 uM	A
M193	Cc1c(c(on1)C)c2ccc3c(c2)nc(n3CCN4CCOCC4)C5C[C@H]5c6ccccc6		DeltaTm							4.2	degC			10 uM	A
M197	Cc1c(c(on1)C)c2ccc3c(c2)nc(n3CCN4CCOCC4)c5cccc6c5cccc6		DeltaTm							5.8	degC			10 uM	A
M169	Cc1c(c(on1)C)c2ccc3c(c2)nc(n3C(C)CN4CCOCC4)CCc5ccc(c(c5)Cl)OC		DeltaTm							5.8	degC			10 uM	A
M170	Cc1c(c(on1)C)c2ccc3c(c2)nc(n3C(C)CN4CCOCC4)CCn5ccc6c5cccc6		DeltaTm							5.6	degC			10 uM	A
72201027	Cc1c(c(on1)C)c2ccc3c(c2)nc(n3C[C@H](C)N4CCOCC4)CCc5ccc(c(c5)Cl)OC		DeltaTm							9.7	degC			10 uM	A
M173	Cc1c(c(on1)C)c2ccc3c(c2)nc(n3C[C@@H](C)N4CCOCC4)CCn5ccc6c5cccc6		DeltaTm							7.2	degC			10 uM	A
M172	Cc1c(c(on1)C)c2ccc3c(c2)nc(n3C[C@@H](C)N4CCOCC4)CCc5cccc(c5)F		DeltaTm							7.3	degC			10 uM	A
M179	Cc1c(c(on1)C)c2ccc3c(c2)nc(n3CCN4CCC4)CCc5ccccc5		DeltaTm							0.6	degC			10 uM	N
M180	Cc1c(c(on1)C)c2ccc3c(c2)nc(n3CCN4CCCC4)CCc5ccccc5		DeltaTm							2.6	degC			10 uM	A
M182	Cc1c(c(on1)C)c2ccc3c(c2)nc(n3CCN4CCCCC4)CCc5ccccc5		DeltaTm							2.7	degC			10 uM	A
M186	Cc1c(c(on1)C)c2ccc3c(c2)nc(n3CCN4CCN(CC4)C)CCc5ccccc5		DeltaTm							2.1	degC			10 uM	A
M188	Cc1c(c(on1)C)c2ccc3c(c2)nc(n3CCN4CCNCC4)CCc5ccccc5		DeltaTm							1.2	degC			10 uM	A
M213	Cc1c(c(on1)C)c2ccc3c(c2)nc(n3CCN4CCSCC4)CCc5ccccc5		DeltaTm							4	degC			10 uM	A
M178	Cc1c(c(on1)C)c2ccc3c(c2)nc(n3CCN4C[C@H](O[C@H](C4)C)C)CCc5ccccc5		DeltaTm							3.9	degC			10 uM	A
M222	Cc1ccccc1CCc2nc3cc(ccc3n2CCN4CCOCC4)c5c(noc5C)C		DeltaTm							3.8	degC			10 uM	A
M218	Cc1cccc(c1)CCc2nc3cc(ccc3n2CCN4CCOCC4)c5c(noc5C)C		DeltaTm							2.7	degC			10 uM	A
M214	Cc1ccc(cc1)CCc2nc3cc(ccc3n2CCN4CCOCC4)c5c(noc5C)C		DeltaTm							3.8	degC			10 uM	A
M202	Cc1c(c(on1)C)c2ccc3c(c2)nc(n3CCN4CCOCC4)CCc5ccc(cc5)OC		DeltaTm							2.4	degC			10 uM	A
M203	Cc1c(c(on1)C)c2ccc3c(c2)nc(n3CCN4CCOCC4)CCc5cccc(c5)N(=O)=O		DeltaTm							1.9	degC			10 uM	A
M201	Cc1c(c(on1)C)c2ccc3c(c2)nc(n3CCN4CCOCC4)CCc5ccc(cc5)N(=O)=O		DeltaTm							2	degC			10 uM	A
M25	Cc1c(c(on1)C)c2ccc3c(c2)nc(n3CCN4CCOCC4)CCc5ccccc5F		DeltaTm							2.6	degC			10 uM	A
M204	Cc1c(c(on1)C)c2ccc3c(c2)nc(n3CCN4CCOCC4)CCc5cccc(c5)F		DeltaTm							2.8	degC			10 uM	A
M200	Cc1c(c(on1)C)c2ccc3c(c2)nc(n3CCN4CCOCC4)CCc5ccc(cc5)F		DeltaTm							3.1	degC			10 uM	A
M198	Cc1c(c(on1)C)c2ccc3c(c2)nc(n3CCN4CCOCC4)CCc5ccc(c(c5)Cl)OC		DeltaTm							1.9	degC			10 uM	A
M199	Cc1c(c(on1)C)c2ccc3c(c2)nc(n3CCN4CCOCC4)CCc5ccc(c(c5)F)OC		DeltaTm							3.2	degC			10 uM	A
M26	Cc1c(c(on1)C)c2ccc3c(c2)nc(n3CCN4CCOCC4)CCc5cccs5		DeltaTm							3.4	degC			10 uM	A
M207	Cc1c(c(on1)C)c2ccc3c(c2)nc(n3CCN4CCOCC4)CCc5nc6ccccc6s5		DeltaTm							3.1	degC			10 uM	A
M208	Cc1c(c(on1)C)c2ccc3c(c2)nc(n3CCN4CCOCC4)CCn5ccc6c5cccc6		DeltaTm							2.8	degC			10 uM	A
M168	Cc1c(c(on1)C)c2ccc3c(c2)cc(n3CCN4CCOCC4)CCc5ccc(c(c5)Cl)OC		DeltaTm							0.42	degC			10 uM	N
M209	Cc1c(c(on1)C)c2ccc3c(c2)nc(n3CCN4CCOCC4)OCc5ccccc5		DeltaTm							3.2	degC			10 uM	A
M210	Cc1c(c(on1)C)c2ccc3c(c2)nc(n3CCN4CCOCC4)COc5ccc(c(c5)F)OC		DeltaTm							2.9	degC			10 uM	A
M191	Cc1c(c(on1)C)c2ccc3c(c2)nc(n3CCN4CCOCC4)C[C@@H](C)c5ccccc5		DeltaTm							3.6	degC			10 uM	A
M189	Cc1c(c(on1)C)c2ccc3c(c2)nc(n3CCN4CCOCC4)C(C)Cc5ccccc5		DeltaTm							2.9	degC			10 uM	A
M190	Cc1c(c(on1)C)c2ccc3c(c2)nc(n3CCN4CCOCC4)C(Cc5ccccc5)O		DeltaTm							1.5	degC			10 uM	A
M195	Cc1c(c(on1)C)c2ccc3c(c2)nc(n3CCN4CCOCC4)C5Cc6ccccc6O5		DeltaTm							3.3	degC			10 uM	A
M194	Cc1c(c(on1)C)c2ccc3c(c2)nc(n3CCN4CCOCC4)C5Cc6ccccc6C5		DeltaTm							3.7	degC			10 uM	A
M196	Cc1c(c(on1)C)c2ccc3c(c2)nc(n3CCN4CCOCC4)C5CCc6ccccc6C5		DeltaTm							2.8	degC			10 uM	A
M193	Cc1c(c(on1)C)c2ccc3c(c2)nc(n3CCN4CCOCC4)C5C[C@H]5c6ccccc6		DeltaTm							2.8	degC			10 uM	A
M197	Cc1c(c(on1)C)c2ccc3c(c2)nc(n3CCN4CCOCC4)c5cccc6c5cccc6		DeltaTm							2.6	degC			10 uM	A
M169	Cc1c(c(on1)C)c2ccc3c(c2)nc(n3C(C)CN4CCOCC4)CCc5ccc(c(c5)Cl)OC		DeltaTm							1.9	degC			10 uM	A
M170	Cc1c(c(on1)C)c2ccc3c(c2)nc(n3C(C)CN4CCOCC4)CCn5ccc6c5cccc6		DeltaTm							1.2	degC			10 uM	A
M171	Cc1c(c(on1)C)c2ccc3c(c2)nc(n3C[C@@H](C)N4CCOCC4)CCc5ccc(c(c5)Cl)OC		DeltaTm							2	degC			10 uM	A
M173	Cc1c(c(on1)C)c2ccc3c(c2)nc(n3C[C@@H](C)N4CCOCC4)CCn5ccc6c5cccc6		DeltaTm							2.3	degC			10 uM	A
M172	Cc1c(c(on1)C)c2ccc3c(c2)nc(n3C[C@@H](C)N4CCOCC4)CCc5cccc(c5)F		DeltaTm							3.4	degC			10 uM	A
M182	Cc1c(c(on1)C)c2ccc3c(c2)nc(n3CCN4CCCCC4)CCc5ccccc5		DeltaTm							2.4	degC			10 uM	A
M171	Cc1c(c(on1)C)c2ccc3c(c2)nc(n3C[C@@H](C)N4CCOCC4)CCc5ccc(c(c5)Cl)OC		DeltaTm							1.2	degC			10 uM	A
M171	Cc1c(c(on1)C)c2ccc3c(c2)nc(n3C[C@@H](C)N4CCOCC4)CCc5ccc(c(c5)Cl)OC		DeltaTm							1.5	degC			10 uM	A
M171	Cc1c(c(on1)C)c2ccc3c(c2)nc(n3C[C@@H](C)N4CCOCC4)CCc5ccc(c(c5)Cl)OC		DeltaTm							-0.31	degC			10 uM	N
M171	Cc1c(c(on1)C)c2ccc3c(c2)nc(n3C[C@@H](C)N4CCOCC4)CCc5ccc(c(c5)Cl)OC		DeltaTm							0.87	degC			10 uM	N
M171	Cc1c(c(on1)C)c2ccc3c(c2)nc(n3C[C@@H](C)N4CCOCC4)CCc5ccc(c(c5)Cl)OC		DeltaTm							9.7	degC			10 uM	A
M171	Cc1c(c(on1)C)c2ccc3c(c2)nc(n3C[C@@H](C)N4CCOCC4)CCc5ccc(c(c5)Cl)OC		DeltaTm							0.78	degC			10 uM	N
[truncated: 7 more columns]
